# Supplementary material for: Access to derivatives of 4-(arylthio)isocoumarins via hydrogen bonding network assisted electrophilic cyclization
Source: Royal Society of Chemistry journal article supplement (doi:10.1039/d3nj04361d), 2023-01-01
Supplement: d3nj04361d1.pdf [file d3nj04361d1.pdf]

## Access to Derivatives of 4-(Arylthio)isocoumarins via Hydrogen Bonding Network Assisted Electrophilic Cyclization

Wenna Xie, <sup>a\*</sup> Shiwen Liu <sup>b</sup>

<sup>a</sup> College of pharmacy, Jiangsu Vocational College of Medicine, Yancheng, 224005, China.

<sup>b</sup> College of Textiles and Clothing, Yancheng Institute of Technology, Jiangsu, 224003, China.

### Content

|                                                                              |    |
|------------------------------------------------------------------------------|----|
| 1. General.....                                                              | 2  |
| 2. General procedure for the preparation of <i>N</i> -thiosuccinimides ..... | 3  |
| 3. General procedure for the preparation of 2-silynylbenzoates .....         | 3  |
| 4. Procedure for preparation of 4-(arylthio)isocoumarins.....                | 3  |
| 5. Procedure for preparation of (alkynyl)(aryl)sulfanes.....                 | 12 |
| 6. Copies of NMR Spectra.....                                                | 15 |
| 7. References .....                                                          | 61 |

## 1. General

Commercial reagents and solvents were obtained from the commercial providers and used without further purification. The products were purified using a commercial flash chromatography system or a regular glass column. TLC was developed on silica gel 60 F254 glass plates.  $^1\text{H}$  NMR (400 MHz) and  $^{13}\text{C}$  NMR (100 MHz) spectra were recorded on a Bruker NMR apparatus. The chemical shifts are reported in  $\delta$  (ppm) values ( $^1\text{H}$  and  $^{13}\text{C}$  NMR relative to  $\text{CHCl}_3$ ,  $\delta$  7.26 ppm for  $^1\text{H}$  NMR and  $\delta$  77.0 ppm for  $^{13}\text{C}$  NMR). Or alternatively,  $^1\text{H}$  NMR chemical shifts were referenced to tetramethylsilane signal (0 ppm). Multiplicities are recorded by s (singlet), d (doublet), t (triplet), q (quartet), p (pentet), h (hextet), m (multiplet) and br (broad). Coupling constants ( $J$ ), are reported in Hertz (Hz). HRMS data were obtained by using Thermo LTQ-Orbitrap XL mass spectrometer with ESI, ACPI or EI ionization sources by the service provided at Indiana University Bloomington Mass Spectral Facility. GC analyses were performed using a Shimadzu GC-2010 ultra gas chromatography–mass spectrometry instrument equipped with a Shimadzu AOC-20s autosampler.

## 2. General procedure for the preparation of *N*-thiosuccinimides

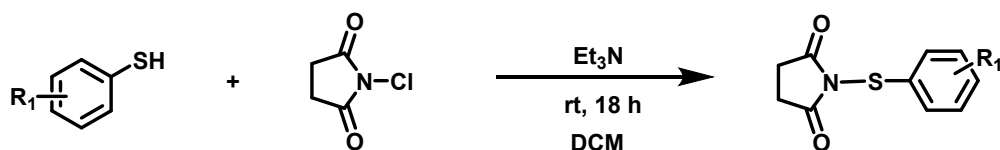

To a  $\text{CH}_2\text{Cl}_2$  (15 mL) solution of NCS (1.01 g, 7.53 mmol) was dropwise added thiol (7.53 mmol, 1.0 equivalent) and  $\text{Et}_3\text{N}$  (1.05 mL, 7.53 mmol) at 0 °C. And then the mixture was stirring for 18 hours at room temperature. Subsequently, the solution was filtered and washed by saturated aqueous  $\text{NH}_4\text{Cl}$ . After evaporation of solvent, the residue was purified by column chromatography on silica gel eluted with hexane/EA to give the *N*-(benzenesulfonyl)succinimide.<sup>[1]</sup>

## 3. General procedure for the preparation of 2-silynylbenzoates

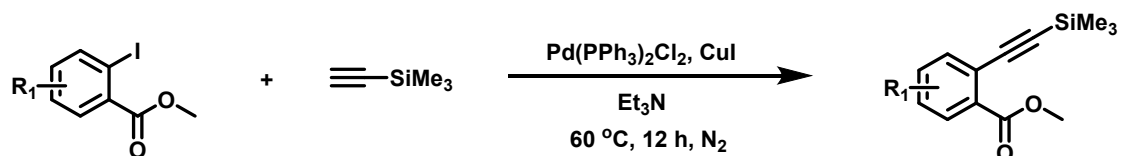

To an oven-dried vial charged with bis(triphenylphosphine)palladium(II) dichloride  $\text{Pd}(\text{PPh}_3)_2\text{Cl}_2$  (36.1 mg, 0.05 mmol) and copper iodide ( $\text{CuI}$ ) (10.0 mg, 0.05 mmol) was added a solution of 2-iodobenzoates (1.59 mmol) dissolved in dry triethylamine (9.0 mL) with stirring for 15 min under argon atmosphere. Then, ethynyltrimethylsilane (0.35 mL, 2.38 mmol) was also introduced into the above mixtures. Next, the reaction was heated to 60°C and further stirred for 12 h. Subsequently, the solution was cooled to room temperature, filtered, and washed by ethyl acetate. After evaporation of solvent, the residue was purified by column chromatography on silica gel eluted with hexane to give 2-silynylbenzoates as pale yellow liquid.<sup>[2]</sup>

## 4. Procedure for preparation of 4-(aryltio)isocoumarins

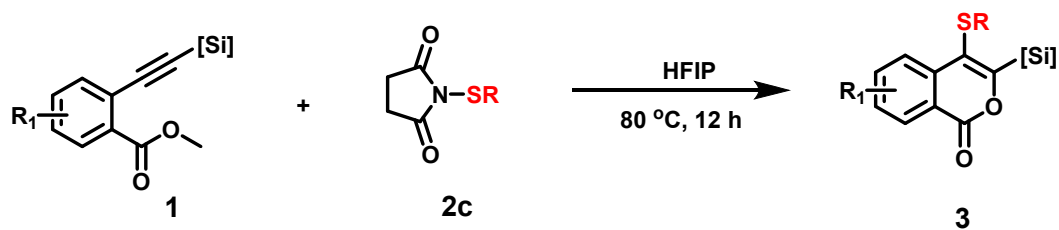

An oven-dried vial was charged with 2-silynylbenzoates (0.1 mmol, 1 equiv), *N*-

thiosuccinimide (0.12 mmol, 1.2 equiv) and HFIP (1.0 mL). After being sealed with a septum, the mixture was stirred at 80 °C for 12 h. This was followed by the addition of water; the aqueous phase was then extracted with ethyl acetate (3 x 10.0 mL). The combined organic layers were dried over Na<sub>2</sub>SO<sub>4</sub> and concentrated. The crude product was purified by silica gel column chromatography.

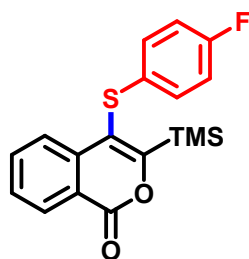

**3a**

**4-((4-fluorophenyl)thio)-3-(trimethylsilyl)-1H-isochromen-1-one (3a).** Following the standard procedure, the desired product was obtained after flash chromatography (PE as eluent) as yellow oil (26 mg, 77 %). <sup>1</sup>H NMR (400 MHz, CDCl<sub>3</sub>) δ 8.32 (d, *J* = 8.1 Hz, 1H), 7.72 – 7.62 (m, 2H), 7.57 – 7.50 (m, 1H), 7.10 – 7.03 (m, 2H), 6.94 (dd, *J* = 12.0, 5.3 Hz, 2H), 0.40 (s, 9H). <sup>13</sup>C NMR (151 MHz, CDCl<sub>3</sub>) δ 170.9, 162.6, 161.2 (d, *J* = 246.1 Hz), 136.2, 135.0, 131.4 (d, *J* = 3.2 Hz), 129.7, 129.2, 127.46 (d, *J* = 7.9 Hz), 124.8, 121.9, 118.6, 116.4 (d, *J* = 22.6 Hz), -0.8. HRMS (EI) *m/z*: [M]<sup>+</sup> Calcd for C<sub>18</sub>H<sub>17</sub>FO<sub>2</sub>SSi 344.0703, found 344.0710.

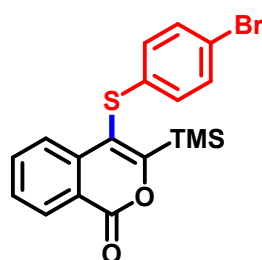

**3b**

**4-((4-bromophenyl)thio)-3-(trimethylsilyl)-1H-isochromen-1-one (3b).** Following the standard procedure, the desired product was obtained after flash chromatography (PE as eluent) as yellow oil (30 mg, 76 %). <sup>1</sup>H NMR (400 MHz, CDCl<sub>3</sub>) δ 8.33 (d, *J* = 7.9 Hz, 1H), 7.69 – 7.63 (m, 2H), 7.56-7.52 (m, 1H), 7.34 (d, *J* = 8.6 Hz, 2H), 6.95 (d, *J* = 8.6 Hz, 2H), 0.38 (s, 9H). <sup>13</sup>C NMR (151 MHz, CDCl<sub>3</sub>) δ 171.3, 162.5, 136.1, 135.8, 135.1, 132.2, 129.8, 129.3, 127.2, 124.7, 121.9, 119.4, 117.9, -0.8. HRMS (EI) *m/z*: [M]<sup>+</sup> Calcd for C<sub>18</sub>H<sub>17</sub>BrO<sub>2</sub>SSi 403.9902, found 403.9908.

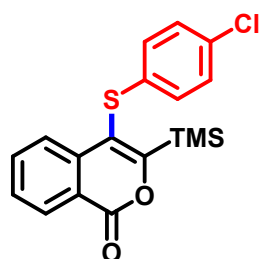

**3c**

**4-((4-chlorophenyl)thio)-3-(trimethylsilyl)-1H-isochromen-1-one (3c).** Following the standard procedure, the desired product was obtained after flash chromatography (PE as eluent) as yellow oil (25 mg, 70 %).  $^1\text{H}$  NMR (400 MHz,  $\text{CDCl}_3$ )  $\delta$  8.32 (d,  $J = 7.8$  Hz, 1H), 7.66 (d,  $J = 3.7$  Hz, 2H), 7.57 – 7.52 (m, 1H), 7.20 (d,  $J = 8.7$  Hz, 2H), 7.01 (d,  $J = 8.7$  Hz, 2H), 0.39 (s, 9H).  $^{13}\text{C}$  NMR (101 MHz,  $\text{CDCl}_3$ )  $\delta$  172.1, 163.3, 136.9, 135.9, 135.8, 132.4, 130.6, 130.2, 130.1, 127.7, 125.5, 122.7, 118.8, 0.00. HRMS (EI)  $m/z$ :  $[\text{M}]^+$  Calcd for  $\text{C}_{18}\text{H}_{17}\text{ClO}_2\text{SSi}$  360.0407, found 360.0408.

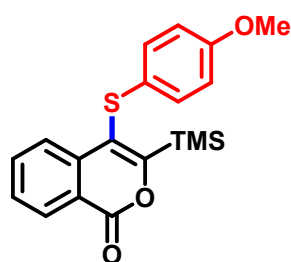

**3d**

**4-((4-methoxyphenyl)thio)-3-(trimethylsilyl)-1H-isochromen-1-one (3d).** Following the standard procedure, the desired product was obtained after flash chromatography (PE/EA= 20:1 as eluent) as yellow oil (29 mg, 81 %).  $^1\text{H}$  NMR (400 MHz,  $\text{CDCl}_3$ )  $\delta$  8.30 (dd,  $J = 7.9, 0.8$  Hz, 1H), 7.72 (d,  $J = 7.6$  Hz, 1H), 7.67 – 7.60 (m, 1H), 7.55 – 7.48 (m, 1H), 7.08 – 7.02 (m, 2H), 6.82 – 6.75 (m, 2H), 3.74 (s, 3H), 0.41 (s, 9H).  $^{13}\text{C}$  NMR (151 MHz,  $\text{CDCl}_3$ )  $\delta$  170.1, 162.8, 158.1, 136.5, 134.8, 129.6, 129.0, 127.6, 126.7, 125.1, 121.9, 119.4, 114.9, 55.3, -0.7. HRMS (EI)  $m/z$ :  $[\text{M}]^+$  Calcd for  $\text{C}_{19}\text{H}_{20}\text{O}_3\text{SSi}$  356.0902, found 356.0905.

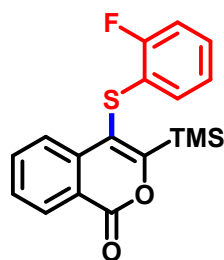

**3e**

**4-((2-fluorophenyl)thio)-3-(trimethylsilyl)-1*H*-isochromen-1-one (3e).** Following the standard procedure, the desired product was obtained after flash chromatography (PE as eluent) as colorless oil (23 mg, 68 %). <sup>1</sup>H NMR (400 MHz, CDCl<sub>3</sub>) δ 8.33 (d, *J* = 7.9 Hz, 1H), 7.74 – 7.64 (m, 2H), 7.60 – 7.51 (m, 1H), 7.14 – 7.05 (m, 2H), 6.97 – 6.89 (m, 1H), 6.72 (td, *J* = 7.9, 1.1 Hz, 1H), 0.39 (s, 9H). <sup>13</sup>C NMR (151 MHz, CDCl<sub>3</sub>) δ 171.6, 162.5, 158.9 (d, *J* = 244.2 Hz), 136.2, 135.1, 129.7, 129.3, 127.1 (d, *J* = 3.0 Hz) 127.0, 124.8 (d, *J* = 3.0 Hz) 124.7, 123.9 (d, *J* = 16.6 Hz), 121.8, 116.8, 115.6 (d, *J* = 21.1 Hz), -0.8. HRMS (EI) *m/z*: [M]<sup>+</sup> Calcd for C<sub>18</sub>H<sub>17</sub>FO<sub>2</sub>SSi 344.0703, found 344.0700.

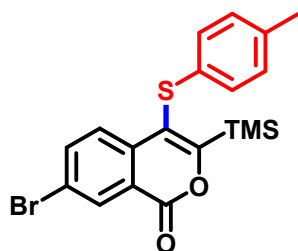

**3f**

**7-bromo-4-(p-tolylthio)-3-(trimethylsilyl)-1*H*-isochromen-1-one (3f).** Following the standard procedure, the desired product was obtained after flash chromatography (PE as eluent) as colorless oil (30 mg, 72 %). <sup>1</sup>H NMR (400 MHz, CDCl<sub>3</sub>) δ 8.43 (d, *J* = 1.9 Hz, 1H), 7.70 (dd, *J* = 8.6, 2.1 Hz, 1H), 7.57 (d, *J* = 8.6 Hz, 1H), 7.04 (d, *J* = 8.1 Hz, 2H), 6.96 (d, *J* = 8.3 Hz, 2H), 2.27 (s, 3H), 0.40 (s, 9H). <sup>13</sup>C NMR (101 MHz, CDCl<sub>3</sub>) δ 171.8, 162.3, 138.8, 136.7, 136.2, 133.0, 132.9, 130.9, 127.8, 126.8, 124.0, 123.7, 119.2, 21.7, -0.0. HRMS (EI) *m/z*: [M]<sup>+</sup> Calcd for C<sub>19</sub>H<sub>19</sub>BrO<sub>2</sub>SSi 418.0058, found 418.0051.

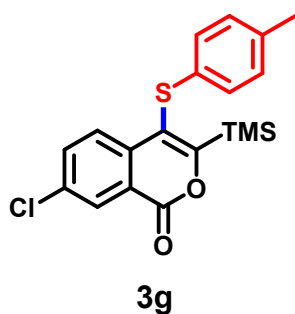

**7-chloro-4-(p-tolylthio)-3-(trimethylsilyl)-1*H*-isochromen-1-one (3g).** Following the standard procedure, the desired product was obtained after flash chromatography (PE as eluent) as colorless oil (28 mg, 77 %). <sup>1</sup>H NMR (400 MHz, CDCl<sub>3</sub>) δ 8.23 (d, *J* = 8.4 Hz, 1H), 7.70 (d, *J* = 1.9 Hz, 1H), 7.46 (dd, *J* = 8.5, 2.0 Hz, 1H), 7.06 (d, *J* = 8.1 Hz, 2H), 6.98 (d, *J* = 8.3 Hz, 2H), 2.28 (s, 3H), 0.39 (s, 9H). <sup>13</sup>C NMR (151 MHz, CDCl<sub>3</sub>) δ 172.4, 162.0, 141.9, 138.2, 135.9, 132.1, 131.3, 130.1, 129.6, 125.9, 124.8, 120.1, 117.9, 20.9, -0.8. HRMS (EI) *m/z*: [M]<sup>+</sup> Calcd for C<sub>19</sub>H<sub>19</sub>ClO<sub>2</sub>SSi 374.0564, found 374.0560.

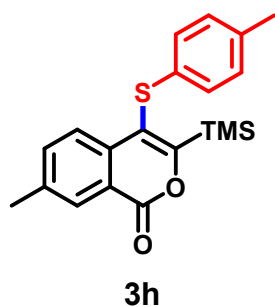

**7-methyl-4-(p-tolylthio)-3-(trimethylsilyl)-1*H*-isochromen-1-one (3h).** Following the standard procedure, the desired product was obtained after flash chromatography (PE as eluent) as colorless oil (23 mg, 67 %). <sup>1</sup>H NMR (400 MHz, CDCl<sub>3</sub>) δ 8.12 (s, 1H), 7.59 (d, *J* = 8.2 Hz, 1H), 7.43 (dd, *J* = 8.2, 1.3 Hz, 1H), 7.02 (d, *J* = 8.2 Hz, 2H), 6.97 (d, *J* = 8.3 Hz, 2H), 2.43 (s, 3H), 2.26 (s, 3H), 0.39 (s, 9H). <sup>13</sup>C NMR (101 MHz, CDCl<sub>3</sub>) δ 170.1, 163.8, 140.2, 136.9, 136.2, 134.8, 133.6, 130.7, 130.0, 126.6, 125.8, 122.5, 119.6, 22.0, 21.6, -0.0. HRMS (EI) *m/z*: [M]<sup>+</sup> Calcd for C<sub>20</sub>H<sub>22</sub>O<sub>2</sub>SSi 354.1110, found 354.1116.

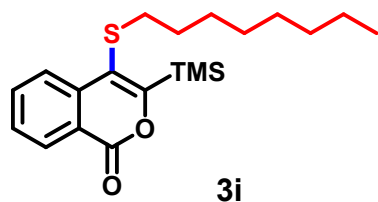

**4-(octylthio)-3-(trimethylsilyl)-1H-isochromen-1-one (3i).** Following the standard procedure, the desired product was obtained after flash chromatography (PE as eluent) as colorless oil (20 mg, 57 %).  $^1\text{H}$  NMR (400 MHz,  $\text{CDCl}_3$ )  $\delta$  8.31 (dd,  $J = 7.9, 0.8$  Hz, 1H), 8.01 (d,  $J = 8.0$  Hz, 1H), 7.85 – 7.78 (m, 1H), 7.60 – 7.53 (m, 1H), 2.66 (t,  $J = 7.6$  Hz, 2H), 1.64 (dd,  $J = 15.1, 7.3$  Hz, 2H), 1.44 – 1.27 (m, 10H), 0.89 (d,  $J = 6.6$  Hz, 3H), 0.45 (s, 9H).  $^{13}\text{C}$  NMR (101 MHz,  $\text{CDCl}_3$ )  $\delta$  168.7, 163.4, 137.4, 135.1, 130.1, 129.3, 125.2, 122.7, 122.3, 37.4, 32.2, 30.1, 30.0, 29.6, 29.5, 23.1, 14.5, 0.0. HRMS (EI)  $m/z$ :  $[\text{M}]^+$  Calcd for  $\text{C}_{20}\text{H}_{30}\text{O}_2\text{SSi}$  362.1736, found 362.1731.

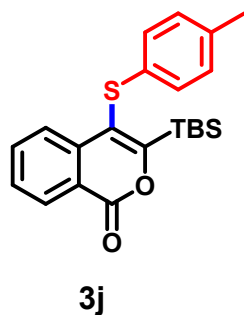

**3-(tert-butyl dimethylsilyl)-4-(p-tolylthio)-1H-isochromen-1-one (3j)** Following the standard procedure, the desired product was obtained after flash chromatography (PE as eluent) as colorless oil (25 mg, 66 %).  $^1\text{H}$  NMR (600 MHz,  $\text{CDCl}_3$ )  $\delta$  8.31 (dd,  $J = 7.9, 1.1$  Hz, 1H), 7.74 (d,  $J = 7.9$  Hz, 1H), 7.65 – 7.60 (m, 1H), 7.54 – 7.48 (m, 1H), 7.03 (d,  $J = 8.1$  Hz, 2H), 7.01 – 6.96 (m, 2H), 2.27 (s, 3H), 1.02 (s, 9H), 0.39 (s, 6H).  $^{13}\text{C}$  NMR (151 MHz,  $\text{CDCl}_3$ )  $\delta$  169.9, 162.6, 136.7, 135.6, 134.9, 133.3, 130.1, 129.6, 129.2, 125.9, 125.6, 119.7, 29.8, 27.1, 18.2, 14.3. HRMS (EI)  $m/z$ :  $[\text{M}]^+$  Calcd for  $\text{C}_{22}\text{H}_{26}\text{O}_2\text{SSi}$  382.1423, found 382.1422.



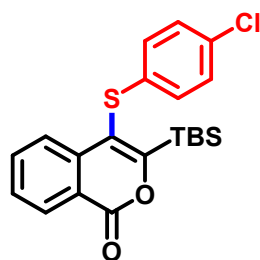

**3k**

**3-(*tert*-butyldimethylsilyl)-4-((4-chlorophenyl)thio)-1*H*-isochromen-1-one (3k).**

Following the standard procedure, the desired product was obtained after flash chromatography (PE as eluent) as colorless oil (32 mg, 79 %). <sup>1</sup>H NMR (600 MHz, CDCl<sub>3</sub>) δ 8.32 (dd, *J* = 7.9, 0.8 Hz, 1H), 7.71 – 7.68 (m, 1H), 7.68 – 7.63 (m, 1H), 7.57 – 7.52 (m, 1H), 7.22 – 7.17 (m, 2H), 7.05 – 6.94 (m, 2H), 1.02 (s, 9H), 0.37 (s, 6H). <sup>13</sup>C NMR (151 MHz, CDCl<sub>3</sub>) δ 170.6, 162.3, 136.3, 135.5, 135.1, 131.6, 129.8, 129.5, 126.9, 125.3, 121.9, 118.9, 29.8, 27.1, 18.1. HRMS (EI) *m/z*: [M]<sup>+</sup> Calcd for C<sub>21</sub>H<sub>23</sub>ClO<sub>2</sub>SSi 402.0877, found 402.0880.

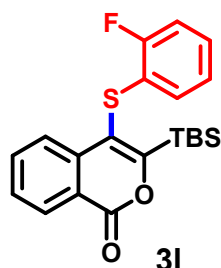

**3l**

**3-(*tert*-butyldimethylsilyl)-4-((2-fluorophenyl)thio)-1*H*-isochromen-1-one (3l).**

Following the standard procedure, the desired product was obtained after flash chromatography (PE as eluent) as yellow oil (24 mg, 62 %). <sup>1</sup>H NMR (600 MHz, CDCl<sub>3</sub>) δ 8.33 (dd, *J* = 7.9, 1.0 Hz, 1H), 7.73 (d, *J* = 7.8 Hz, 1H), 7.70 – 7.65 (m, 1H), 7.58 – 7.52 (m, 1H), 7.15 – 7.04 (m, 2H), 6.96 – 6.89 (m, 1H), 6.72 (td, *J* = 7.8, 1.4 Hz, 1H), 1.02 (s, 9H), 0.37 (s, 6H). <sup>13</sup>C NMR (151 MHz, CDCl<sub>3</sub>) δ 170.9, 162.4, 158.9 (d, *J* = 244.6 Hz), 136.4, 135.2, 129.8, 129.5, 127.3 (d, *J* = 2.4 Hz), 127.1 (d, *J* = 7.5 Hz), 125.2, 124.9 (d, *J* = 3.4 Hz), 124.5, 124.4, 121.8, 115.7 (d, *J* = 21.1 Hz), 29.8, 27.1, 18.1. HRMS (EI) *m/z*: [M]<sup>+</sup> Calcd for C<sub>21</sub>H<sub>23</sub>FO<sub>2</sub>SSi 386.1172, found 386.1181.

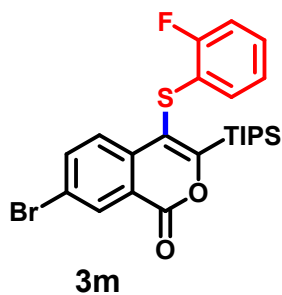

**7-bromo-4-((2-fluorophenyl)thio)-3-(triisopropylsilyl)-1H-**

**isochromen-1-one (3m).** Following the standard procedure, the desired product was obtained after flash chromatography (PE as eluent) as colorless oil (71 mg, 44 %). <sup>1</sup>H NMR (600 MHz, CDCl<sub>3</sub>) δ 8.46 (d, *J* = 2.1 Hz, 1H), 7.74 (dd, *J* = 8.6, 2.1 Hz, 1H), 7.54 (d, *J* = 8.6 Hz, 1H), 7.13 – 7.05 (m, 2H), 6.93 – 6.88 (m, 1H), 6.63 (td, *J* = 7.8, 1.2 Hz, 1H), 1.63 (dt, *J* = 15.0, 7.5 Hz, 3H), 1.12 (d, *J* = 7.5 Hz, 18H). <sup>13</sup>C NMR (151 MHz, CDCl<sub>3</sub>) δ 171.2, 161.2, 158.7 (d, *J* = 244.2 Hz), 138.1, 135.0, 132.1, 127.1 (d, *J* = 3.0 Hz), 127.0 (d, *J* = 7.5 Hz), 124.7 (d, *J* = 3.6 Hz), 123.1, 122.8, 115.6 (d, *J* = 19.6 Hz), 29.7, 18.9. HRMS (EI) *m/z*: [M]<sup>+</sup> Calcd for C<sub>24</sub>H<sub>28</sub>BrFO<sub>2</sub>SSi 506.0747, found 506.0740.

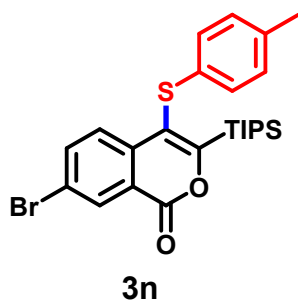

**7-bromo-4-(p-tolylthio)-3-(triisopropylsilyl)-1H-isochromen-1-one (3n).** Following the standard procedure, the desired product was obtained after flash chromatography (PE as eluent) as colorless oil (36 mg, 72 %). <sup>1</sup>H NMR (600 MHz, CDCl<sub>3</sub>) δ 8.44 (d, *J* = 2.1 Hz, 1H), 7.69 (dd, *J* = 8.7, 2.1 Hz, 1H), 7.55 (d, *J* = 8.7 Hz, 1H), 7.02 (d, *J* = 8.2 Hz, 2H), 6.91 (d, *J* = 8.2 Hz, 2H), 2.27 (s, 3H), 1.64 (dd, *J* = 10.0, 5.0 Hz, 3H), 1.14 (d, *J* = 7.5 Hz, 18H). <sup>13</sup>C NMR (151 MHz, CDCl<sub>3</sub>) δ 170.0, 161.5, 138.0, 135.6, 135.4, 132.5, 132.0, 130.1, 127.8, 125.9, 123.0, 122.9, 119.5, 29.8, 19.0, 12.7. HRMS (EI) *m/z*: [M]<sup>+</sup> Calcd for C<sub>25</sub>H<sub>31</sub>BrO<sub>2</sub>SSi 502.0997, found 502.0990.

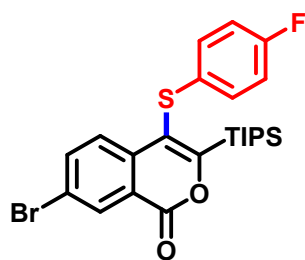

**3o**

**7-bromo-4-((4-fluorophenyl)thio)-3-(triisopropylsilyl)-1*H*-isochromen-1-one (3o).**

Following the standard procedure, the desired product was obtained after flash chromatography (PE as eluent) as colorless oil (33 mg, 66 %). <sup>1</sup>H NMR (600 MHz, CDCl<sub>3</sub>) δ 8.45 (d, *J* = 2.1 Hz, 1H), 7.72 (dd, *J* = 8.6, 2.1 Hz, 1H), 7.53 (d, *J* = 8.6 Hz, 1H), 7.02 – 6.96 (m, 2H), 6.96 – 6.89 (m, 2H), 1.62 (dd, *J* = 15.0, 7.5 Hz, 3H), 1.13 (d, *J* = 7.5 Hz, 18H). <sup>13</sup>C NMR (151 MHz, CDCl<sub>3</sub>) δ 170.6, 161.3, 161.2 (d, *J* = 246.1 Hz), 138.1, 135.1, 132.2, 131.3 127.5 (d, *J* = 7.1 Hz) 127.4, 123.2, 123.0, 119.2, 116.6 (d, *J* = 21.1 Hz), 29.8, 19.0. HRMS (EI) *m/z*: [M]<sup>+</sup> Calcd for C<sub>24</sub>H<sub>28</sub>BrFO<sub>2</sub>SSi 506.0747, found 506.0751.

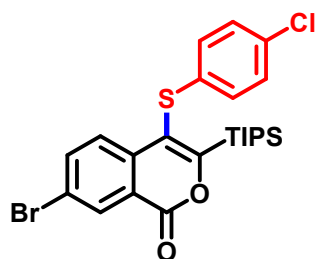

**3p**

**7-bromo-4-((4-chlorophenyl)thio)-3-(triisopropylsilyl)-1*H*-isochromen-1-one (3p).**

Following the standard procedure, the desired product was obtained after flash chromatography (PE as eluent) as colorless oil (47 mg, 72 %). <sup>1</sup>H NMR (600 MHz, CDCl<sub>3</sub>) δ 8.48 (d, *J* = 2.1 Hz, 1H), 7.76 (dd, *J* = 8.6, 2.1 Hz, 1H), 7.53 (d, *J* = 8.6 Hz, 1H), 7.21 (d, *J* = 8.7 Hz, 2H), 6.97 (d, *J* = 8.7 Hz, 2H), 1.66 – 1.63 (m, 3H), 1.15 (s, 18H). <sup>13</sup>C NMR (151 MHz, CDCl<sub>3</sub>) δ 170.9, 161.2, 138.2, 134.9, 134.8, 132.3, 131.7, 129.5, 127.4, 127.0, 123.3, 123.0, 118.6, 29.8, 19.0. HRMS (EI) *m/z*: [M]<sup>+</sup> Calcd for C<sub>24</sub>H<sub>28</sub>BrClO<sub>2</sub>SSi 522.0451, found 522.0457.

## 5. Procedure for preparation of (alkynyl)(aryl)sulfanes

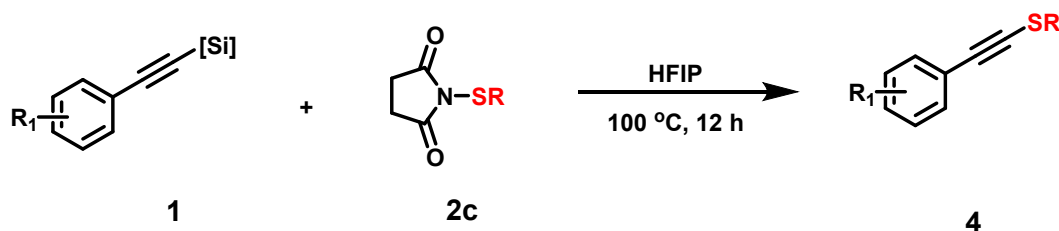

An oven-dried vial was charged with aryl(trimethylsilyl)ethyne (0.1 mmol, 1 equiv), *N*-thiosuccinimide or *N*-(trifluoromethylthio)succinimide (0.12 mmol, 1.2 equiv) and HFIP (1.0 mL). After being sealed with a septum, the mixture was stirred at 100 °C for 12 h. This was followed by the addition of water; the aqueous phase was then extracted with ethyl acetate (3 x 10.0 mL). The combined organic layers were dried over Na<sub>2</sub>SO<sub>4</sub> and concentrated. The crude product was purified by silica gel column chromatography.

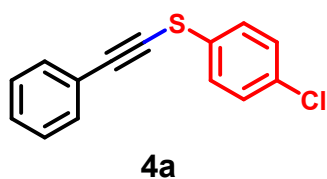

**(4-chlorophenyl)(phenylethynyl)sulfane (4a)**. Following the standard procedure, the desired product was obtained after flash chromatography (PE as eluent) as white solid (16 mg, 66 %). <sup>1</sup>H NMR (400 MHz, CDCl<sub>3</sub>) δ 7.54 – 7.48 (m, 2H), 7.41 (d, *J* = 8.5 Hz, 2H), 7.34 (dd, *J* = 10.9, 6.7 Hz, 5H). <sup>13</sup>C NMR (151 MHz, CDCl<sub>3</sub>) δ 132.5, 131.8, 131.6, 129.4, 128.9, 128.5, 127.5, 122.6, 98.4, 74.8.

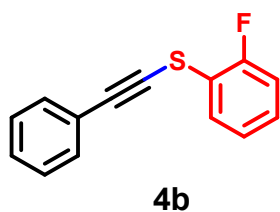

**(2-fluorophenyl)(phenylethynyl)sulfane (4b)**. Following the standard procedure, the desired product was obtained after flash chromatography (PE as eluent) as white solid (16 mg, 70 %). <sup>1</sup>H NMR (400 MHz, CDCl<sub>3</sub>) δ 7.68 (dd, *J* = 11.0, 4.3 Hz, 1H), 7.57 – 7.49 (m, 2H), 7.35 (d, *J* = 4.5 Hz, 3H), 7.21 (dt, *J* = 14.2, 7.0 Hz, 2H), 7.07 (t, *J* = 9.0 Hz, 1H). <sup>13</sup>C NMR (151 MHz, CDCl<sub>3</sub>) δ 158.9 (d, *J* = 246.1 Hz), 131.9, 128.9, 128.5,

128.2 (d,  $J = 3.0$  Hz), 128.1 (d,  $J = 3.7$  Hz), 125.0 (d,  $J = 3.4$  Hz), 122.5, 120.5 (d,  $J = 16.3$  Hz), 115.4 (d,  $J = 19.6$  Hz), 98.3, 73.5. HRMS (EI)  $m/z$ :  $[M]^+$  Calcd for  $C_{14}H_9FS$  228.0409, found 228.0400.

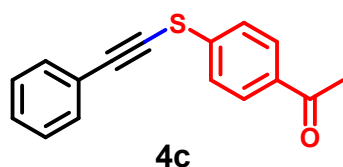

**1-(4-((phenylethynyl)thio)phenyl)ethan-1-one (4c).** Following the standard procedure, the desired product was obtained after flash chromatography (PE/EA = 20:1 as eluent) as white solid (18 mg, 73 %).  $^1H$  NMR (400 MHz,  $CDCl_3$ )  $\delta$  7.94 (d,  $J = 8.3$  Hz, 2H), 7.55 (t,  $J = 6.7$  Hz, 4H), 7.38 (d,  $J = 5.0$  Hz, 3H), 2.59 (s, 3H).  $^{13}C$  NMR (151 MHz,  $CDCl_3$ )  $\delta$  197.01, 140.0, 135.2, 131.9, 129.1, 129.0, 128.5, 125.4, 122.4, 99.5, 73.6, 26.5. HRMS (EI)  $m/z$ :  $[M]^+$  Calcd for  $C_{16}H_{12}OS$  252.0609, found 252.0600.

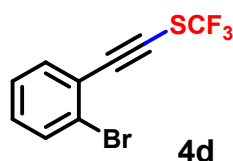

**((2-bromophenyl)ethynyl)(trifluoromethyl)sulfane (4d).** Following the standard procedure, the desired product was obtained after flash chromatography (PE as eluent) as colorless oil (17 mg, 61 %).  $^1H$  NMR (400 MHz,  $CDCl_3$ )  $\delta$  7.61 (d,  $J = 8.0$  Hz, 1H), 7.53 – 7.46 (m, 1H), 7.30 (t,  $J = 7.4$  Hz, 1H), 7.26 – 7.20 (m, 1H).  $^{19}F$  NMR (377 MHz,  $CDCl_3$ )  $\delta$  -43.07 (s).  $^{13}C$  NMR (151 MHz,  $CDCl_3$ )  $\delta$  133.6, 132.6, 130.6, 127.9 (q,  $J = 318.6$  Hz), 125.8, 123.9, 99.7, 71.63 (q,  $J = 4.1$  Hz). HRMS (EI)  $m/z$ :  $[M]^+$  Calcd for  $C_9H_4BrF_3S$  279.9169, found 279.9177.

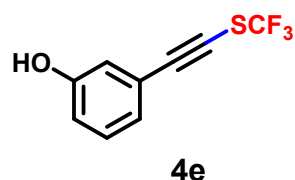

**3-(((trifluoromethyl)thio)ethynyl)phenol (4e).** Following the standard procedure, the desired product was obtained after flash chromatography (PE/EA = 8:1 as eluent)

as colorless oil (13 mg, 58 %).  $^1\text{H}$  NMR (400 MHz,  $\text{CDCl}_3$ )  $\delta$  7.22 (t,  $J = 7.9$  Hz, 1H), 7.07 (d,  $J = 7.6$  Hz, 1H), 6.96 (s, 1H), 6.88 (d,  $J = 8.2$  Hz, 1H), 3.08 (s, 1H).  $^{19}\text{F}$  NMR (377 MHz,  $\text{CDCl}_3$ )  $\delta$  -43.55 (s).  $^{13}\text{C}$  NMR (151 MHz,  $\text{CDCl}_3$ )  $\delta$  155.5, 129.8, 128.1 (q,  $J = 312.3$  Hz), 124.8, 122.7, 118.7, 117.3, 100.9, 66.8 (q,  $J = 4.3$  Hz). HRMS (EI)  $m/z$ :  $[\text{M}]^+$  Calcd for  $\text{C}_9\text{H}_5\text{F}_3\text{OS}$  218.0013, found 218.0019.

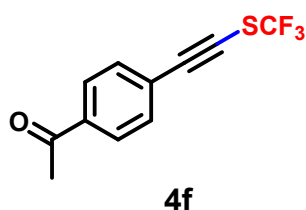

**1-(4-(((trifluoromethyl)thio)ethynyl)phenyl)ethan-1-one (4f).** Following the standard procedure, the desired product was obtained after flash chromatography (PE/EA = 20:1 as eluent) as colorless oil (16 mg, 70 %).  $^1\text{H}$  NMR (400 MHz,  $\text{CDCl}_3$ )  $\delta$  7.94 (d,  $J = 8.1$  Hz, 2H), 7.56 (d,  $J = 8.1$  Hz, 2H), 2.61 (s, 3H).  $^{19}\text{F}$  NMR (377 MHz,  $\text{CDCl}_3$ )  $\delta$  -43.15 (s).  $^{13}\text{C}$  NMR (151 MHz,  $\text{CDCl}_3$ )  $\delta$  197.1, 137.2, 131.9, 128.3, 127.9 (q,  $J = 312.6$  Hz), 126.1, 100.4, 70.4 (q,  $J = 4.2$  Hz), 26.7. HRMS (EI)  $m/z$ :  $[\text{M}]^+$  Calcd for  $\text{C}_{11}\text{H}_7\text{F}_3\text{OS}$  244.0170, found 244.0178.

## 6. Copies of NMR Spectra

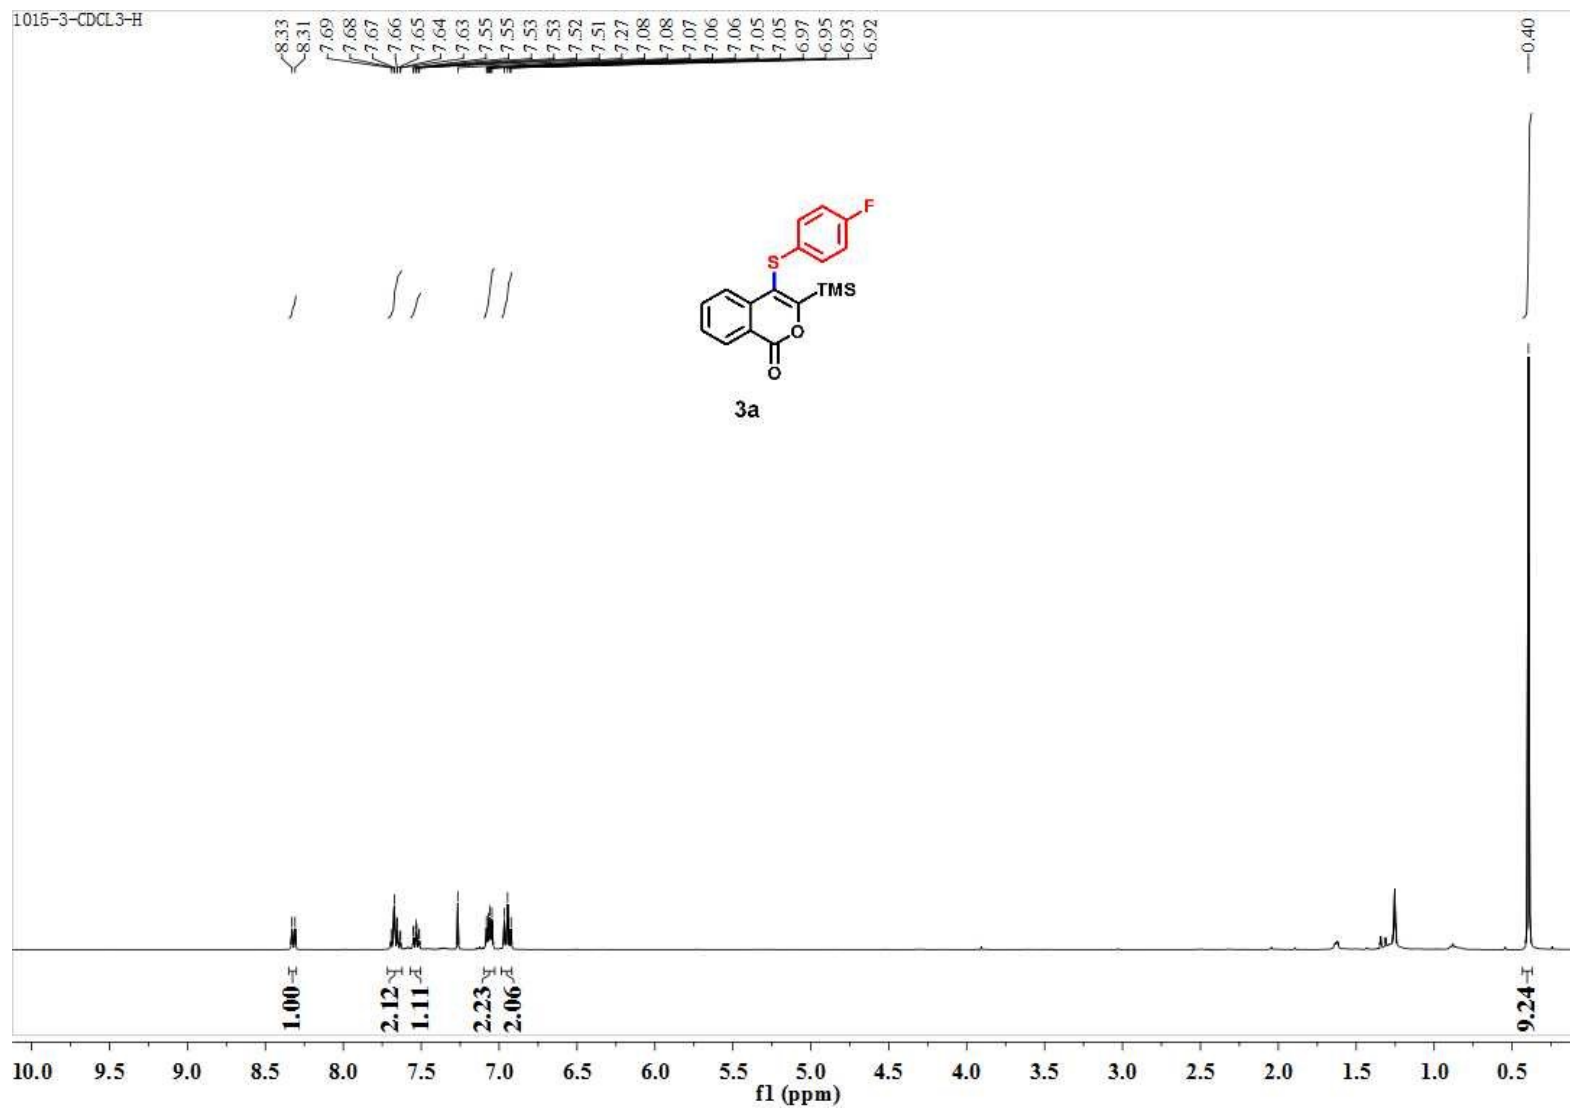

1015-3-CDCL3-H

170.94

162.60

162.04

160.41

136.22

134.99

131.41

131.39

129.73

129.25

127.49

127.44

124.82

121.95

118.64

116.51

116.36

-0.79

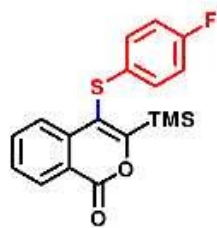

3a

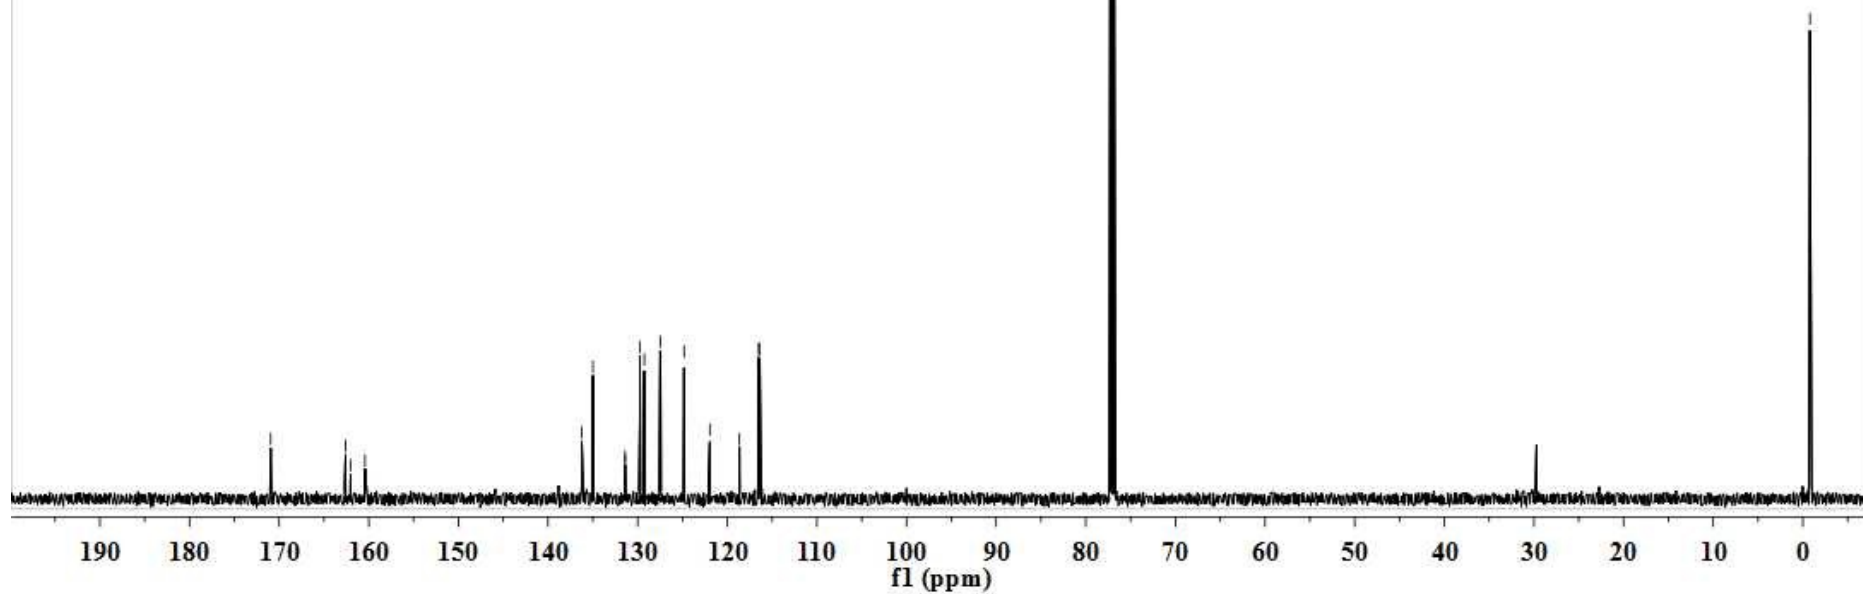



1018-2-CDCL3-H

8.34  
8.32  
7.66  
7.66  
7.65  
7.54  
7.35  
7.33  
6.96  
6.94

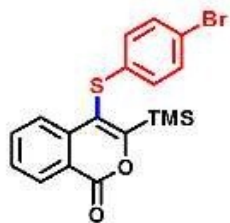

3b

0.38

10.0 9.5 9.0 8.5 8.0 7.5 7.0 6.5 6.0 5.5 5.0 4.5 4.0 3.5 3.0 2.5 2.0 1.5 1.0 0.5

1.00  
2.05  
1.27  
2.26  
2.06  
9.26

fl (ppm)

3b-1018-2-4BR

—171.34

—162.52

136.08

135.78

135.08

132.26

129.79

129.34

127.23

124.72

121.91

119.40

117.91

—0.83

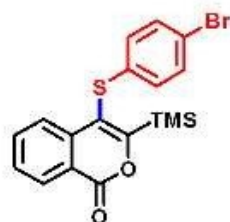

3b

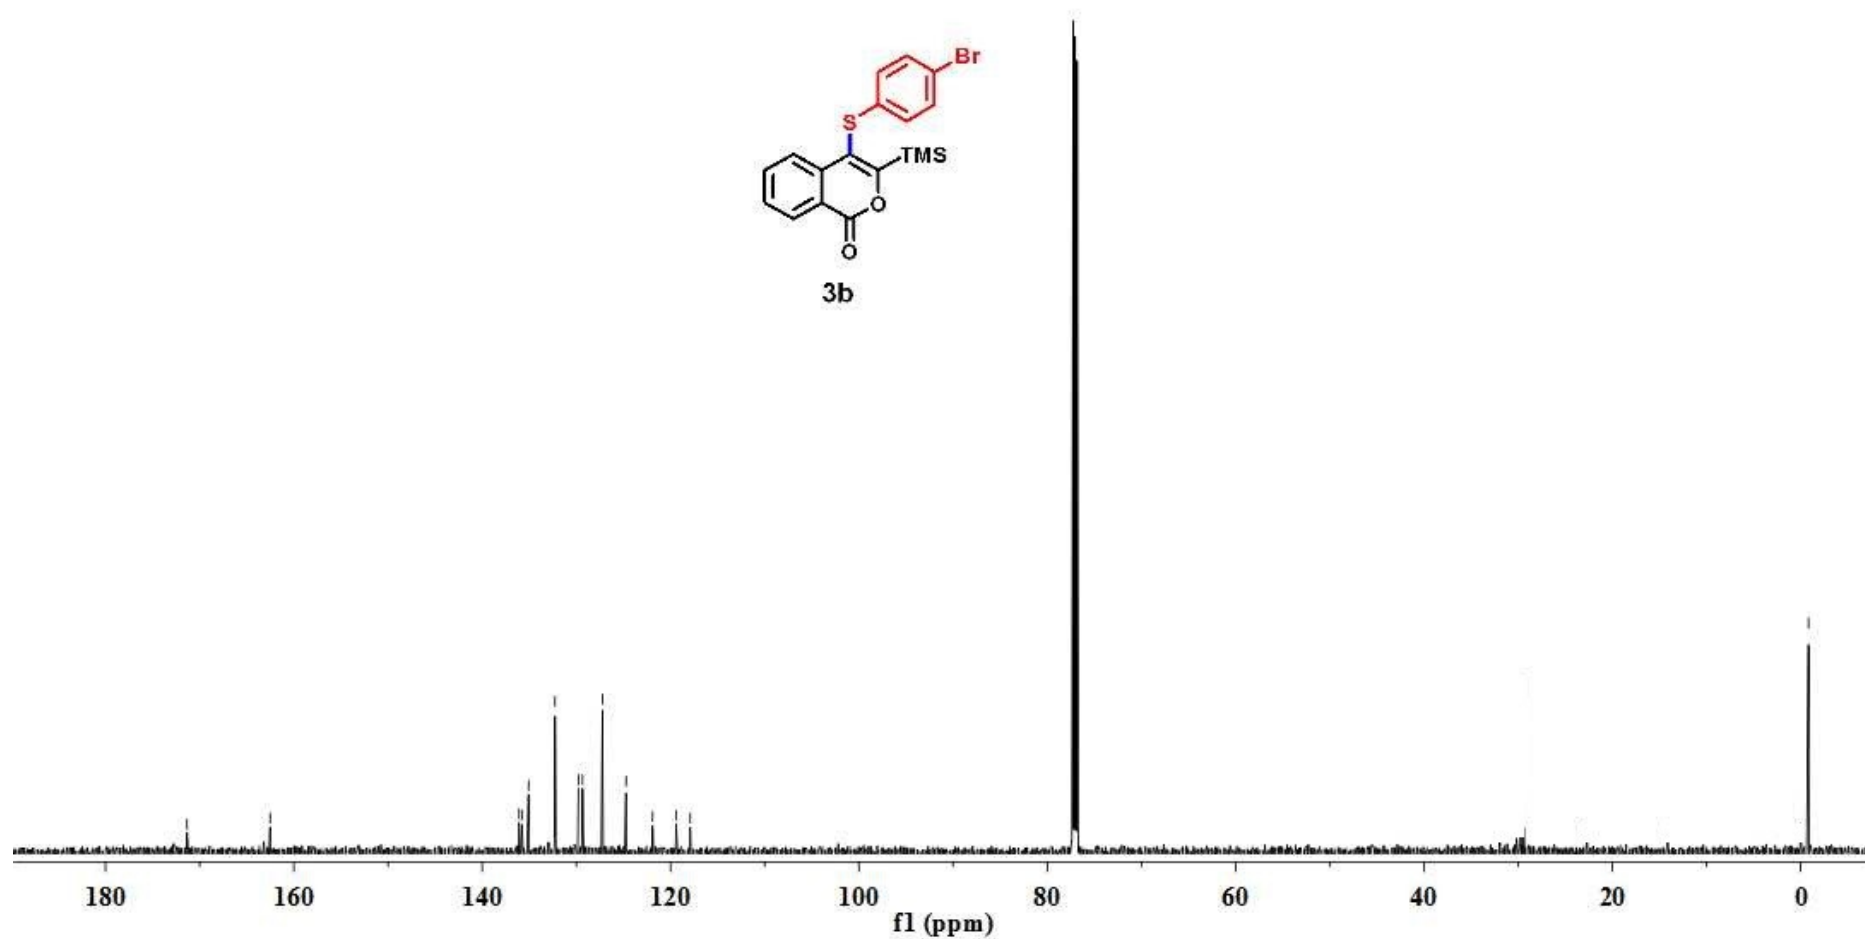

1015-2-CDCL3-H

8.33  
8.31  
7.67  
7.66  
7.56  
7.55  
7.54  
7.53  
7.52  
7.27  
7.21  
7.19  
7.02  
7.00

| | | |

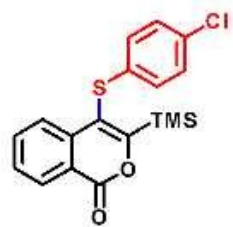

3c

0.39

1.00  
2.08  
1.10  
2.00  
2.07

9.21

10.5 10.0 9.5 9.0 8.5 8.0 7.5 7.0 6.5 6.0 5.5 5.0 4.5 4.0 3.5 3.0 2.5 2.0 1.5 1.0 0.5 0.0  
f1 (ppm)

1015-2-CDCl<sub>3</sub>-C

—172.11

—163.34

136.94

135.90

135.88

132.44

130.60

130.20

130.15

127.76

125.56

122.74

118.86

—0.00

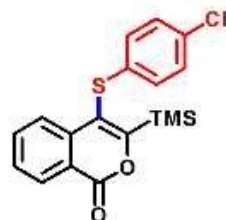

3c

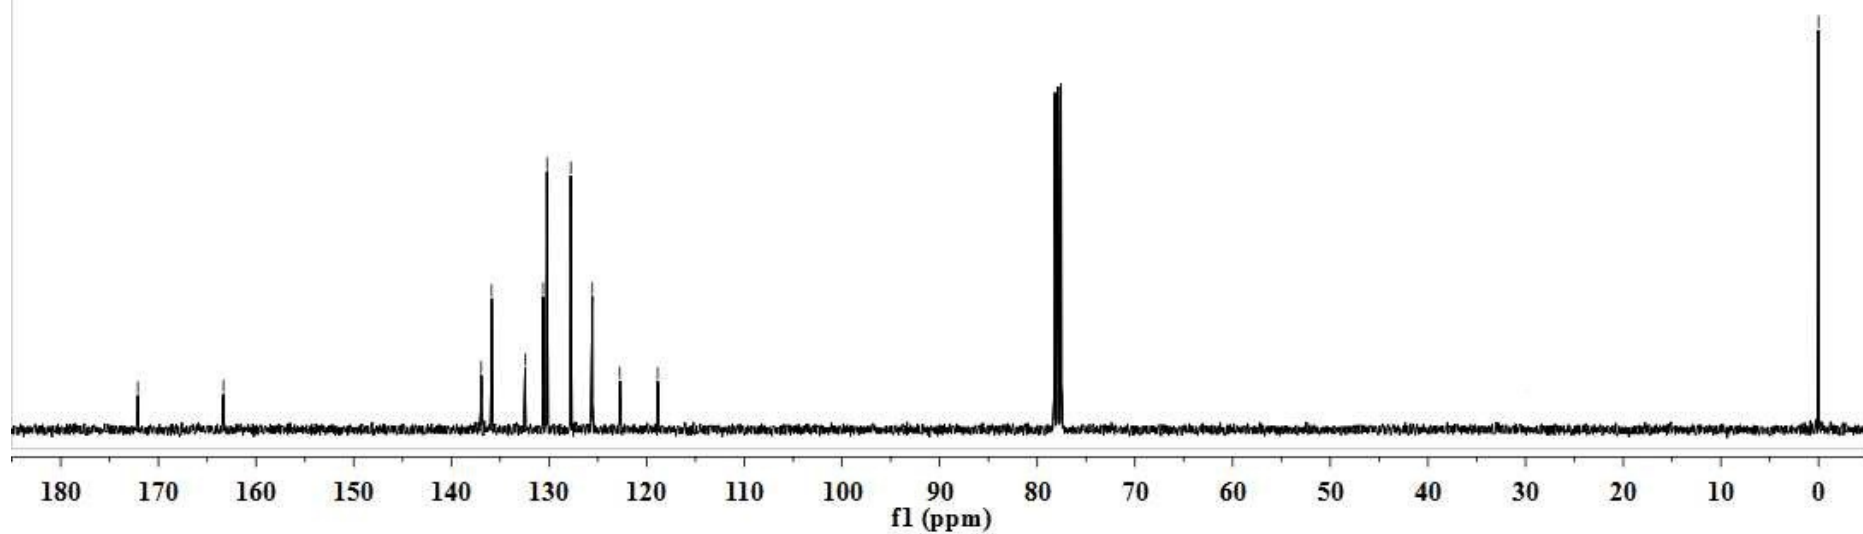

1018-1-CDCL3-H

8.31  
8.31  
8.29  
8.29  
7.73  
7.71  
7.65  
7.65  
7.63  
7.63  
7.61  
7.61  
7.52  
7.52  
7.50  
7.49  
7.48  
7.26  
7.06  
7.05  
7.04  
7.04  
6.80  
6.79  
6.78  
6.78

3.74

0.41

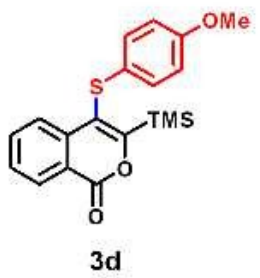

1  
111  
11

1.00  
1.04  
1.08  
1.07  
2.05  
2.07

3.09

9.20

10.0 9.5 9.0 8.5 8.0 7.5 7.0 6.5 6.0 5.5 5.0 4.5 4.0 3.5 3.0 2.5 2.0 1.5 1.0 0.5  
f1 (ppm)

1018-1-CDCL3-H

—170.14

—162.80

—158.12

136.50

134.85

129.58

129.03

127.60

126.75

125.06

121.96

119.40

114.95

—55.31

—0.70

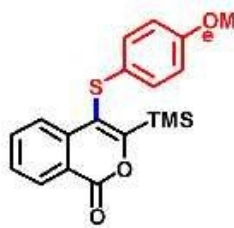

3d

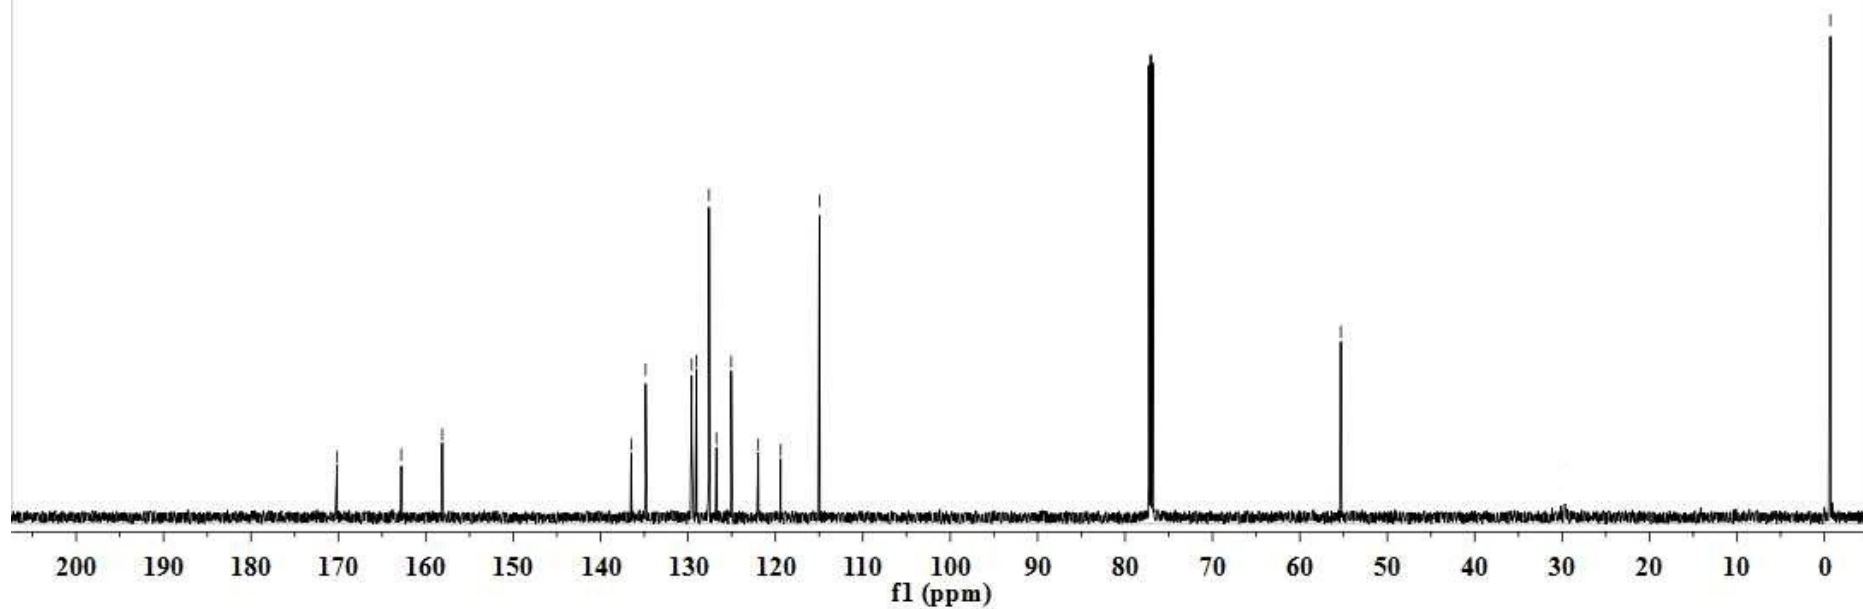

1015-1-CDL3-H

8.34  
8.32  
7.71  
7.70  
7.69  
7.69  
7.67  
7.67  
7.65  
7.65  
7.56  
7.56  
7.54  
7.53  
7.52  
7.27  
7.13  
7.12  
7.11  
7.09  
7.09  
7.08  
7.08  
7.06  
6.94  
6.94  
6.92  
6.90  
6.90  
6.74  
6.73  
6.72  
6.71  
6.70  
6.69

1  
11  
111

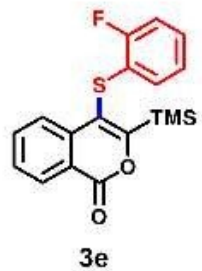

1.00  
2.09  
1.08  
2.09  
1.06  
1.02

9.19

10.0 9.5 9.0 8.5 8.0 7.5 7.0 6.5 6.0 5.5 5.0 4.5 4.0 3.5 3.0 2.5 2.0 1.5 1.0 0.5

fl (ppm)

3e-1-2F

171.61  
162.56  
159.72  
158.10  
136.25  
135.11  
129.74  
129.34  
127.12  
127.10  
127.04  
124.83  
124.81  
124.68  
124.04  
123.92  
121.84  
116.81  
115.66  
115.52

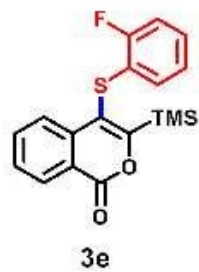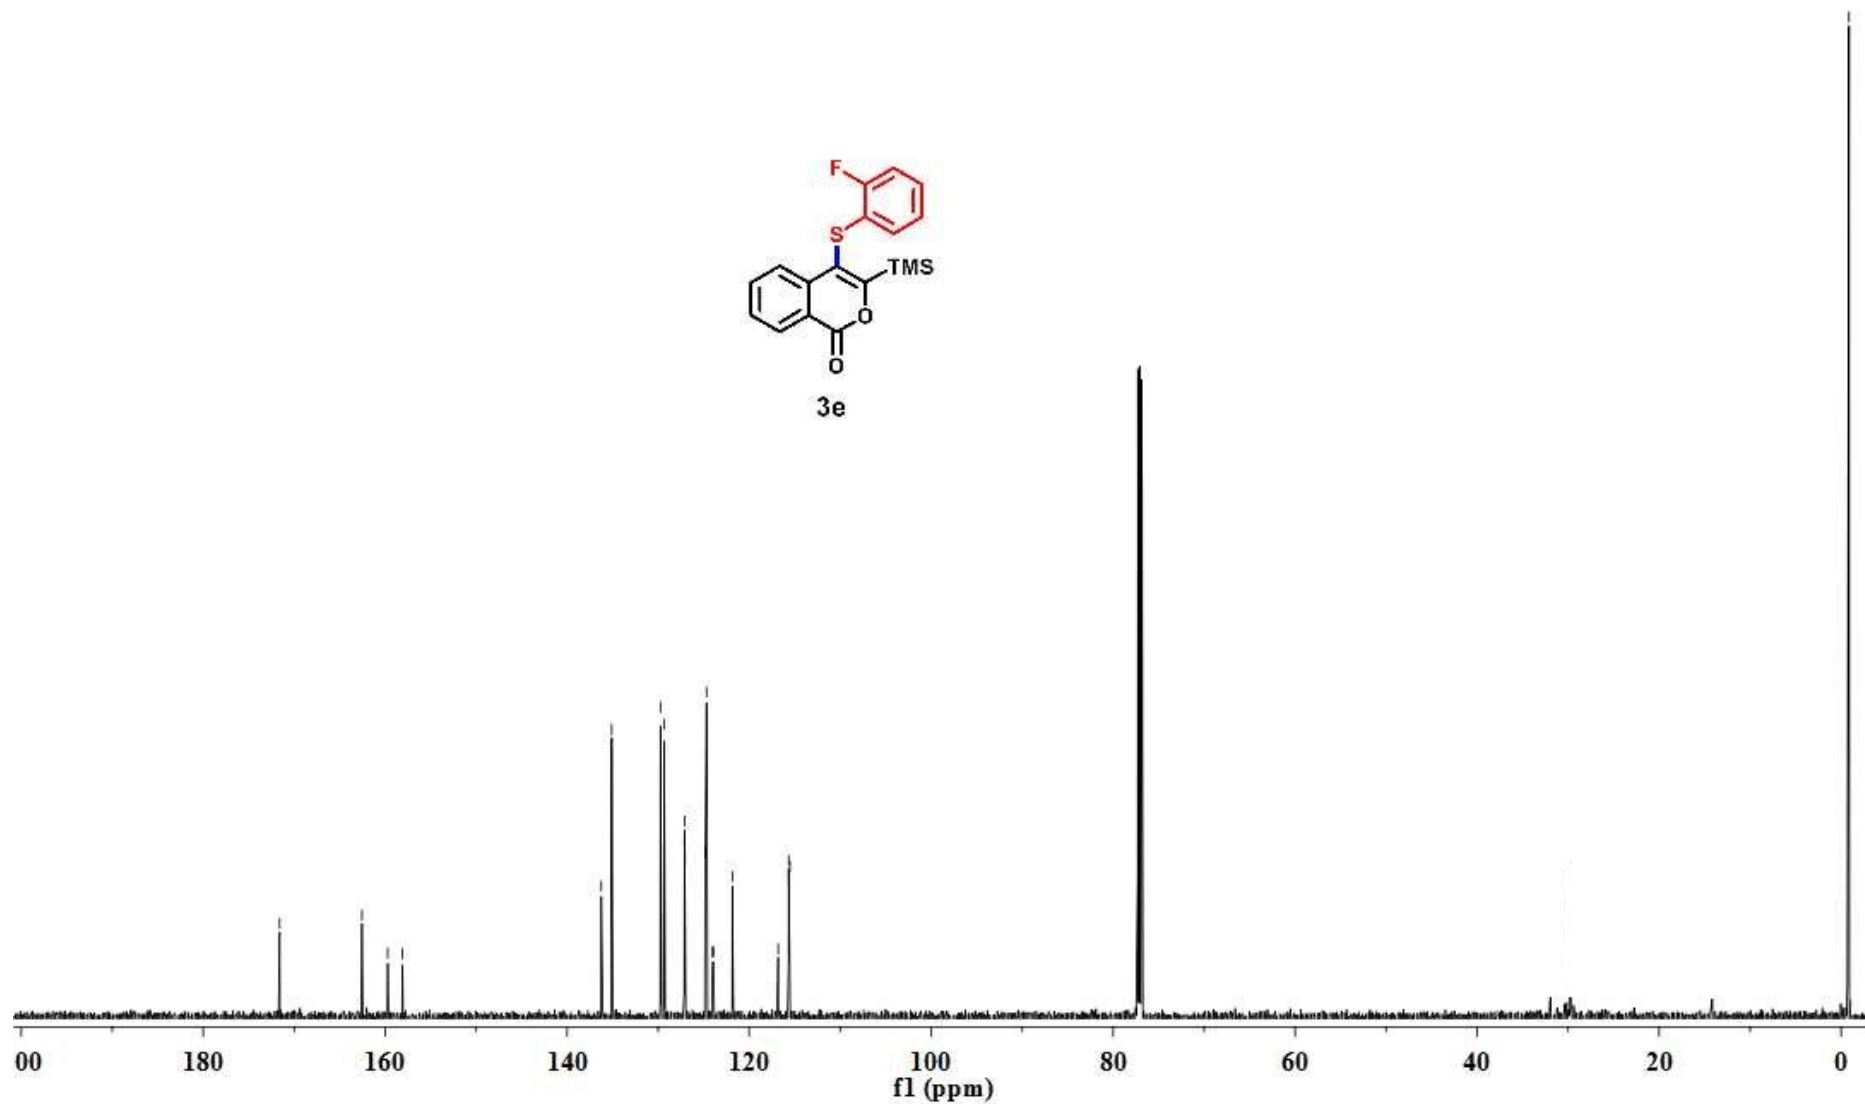



1129-1-CCL3-H

8.43  
8.43  
7.72  
7.71  
7.69  
7.58  
7.56  
7.05  
7.03  
6.97  
6.95

2.27

0.40

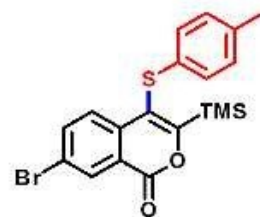

3f

|  
||  
|||

|

|

1.00

1.04

1.15

2.18

2.24

3.12

9.29

1.0 10.5 10.0 9.5 9.0 8.5 8.0 7.5 7.0 6.5 6.0 5.5 5.0 4.5 4.0 3.5 3.0 2.5 2.0 1.5 1.0 0.5

fl (ppm)

1129-1-CDCl3-C

—171.85

—162.32

138.82  
136.68  
136.17  
133.06  
132.89  
130.91  
127.78  
126.77  
124.05  
123.68  
119.23

—21.74

—0.00

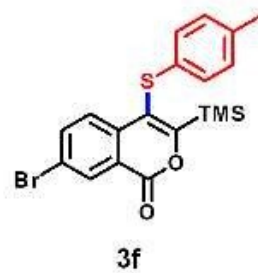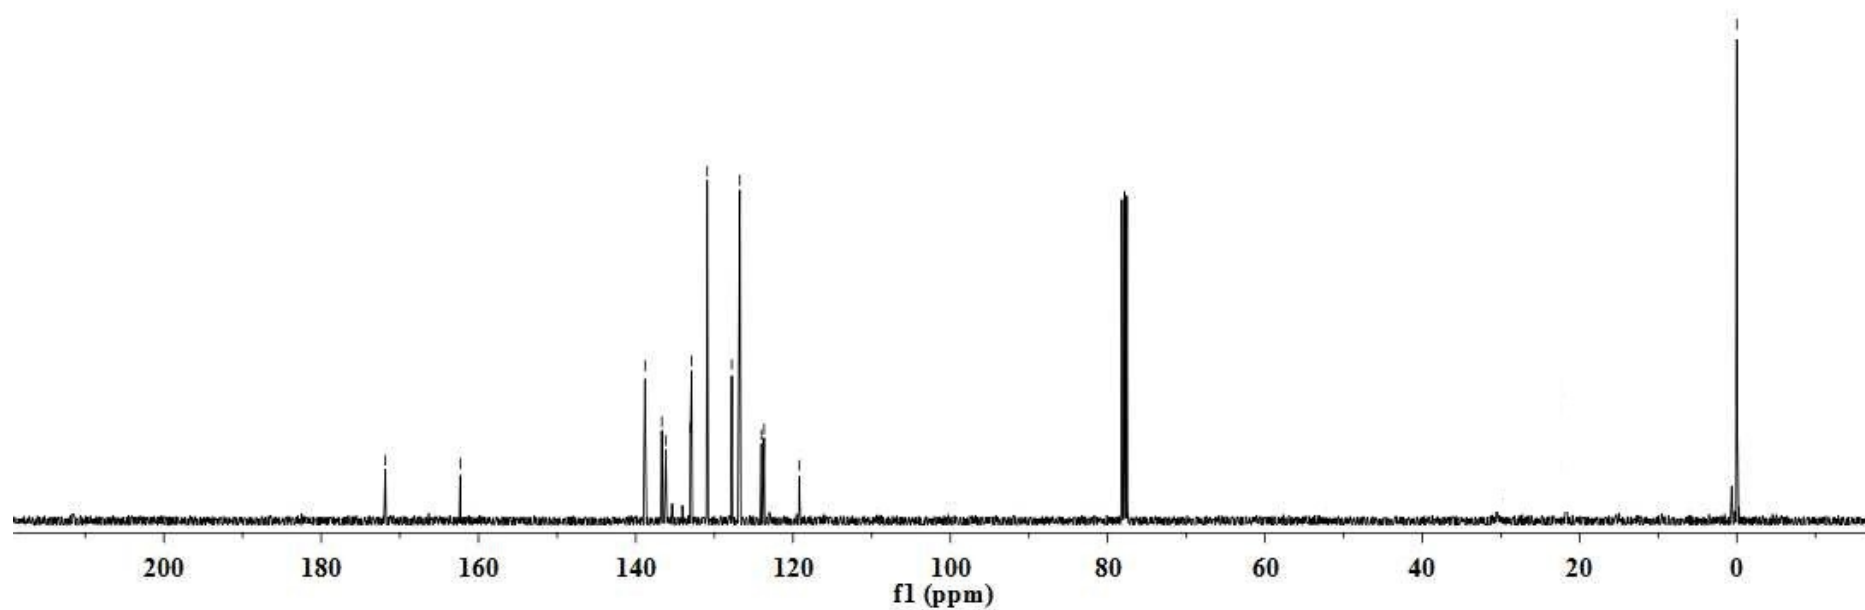

1129-2-DCL3-H

8.24  
8.22  
7.70  
7.70  
7.47  
7.46  
7.45  
7.44  
7.26  
7.07  
7.05  
6.99  
6.97

1  
1  
1  
||

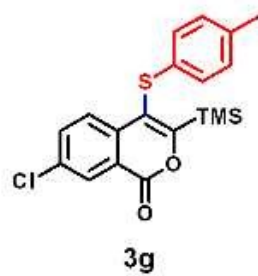

2.28

1

0.39

1

1.01

0.97

1.00

2.07

2.06

3.05

9.26

1.0 9.5 9.0 8.5 8.0 7.5 7.0 6.5 6.0 5.5 5.0 4.5 4.0 3.5 3.0 2.5 2.0 1.5 1.0 0.5  
f1 (ppm)

1129-2-DCL3-H

—172.37

—162.00

141.91

138.25

135.88

132.16

131.35

130.14

129.62

125.90

124.77

120.16

117.90

—20.94

—0.82

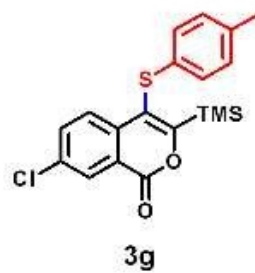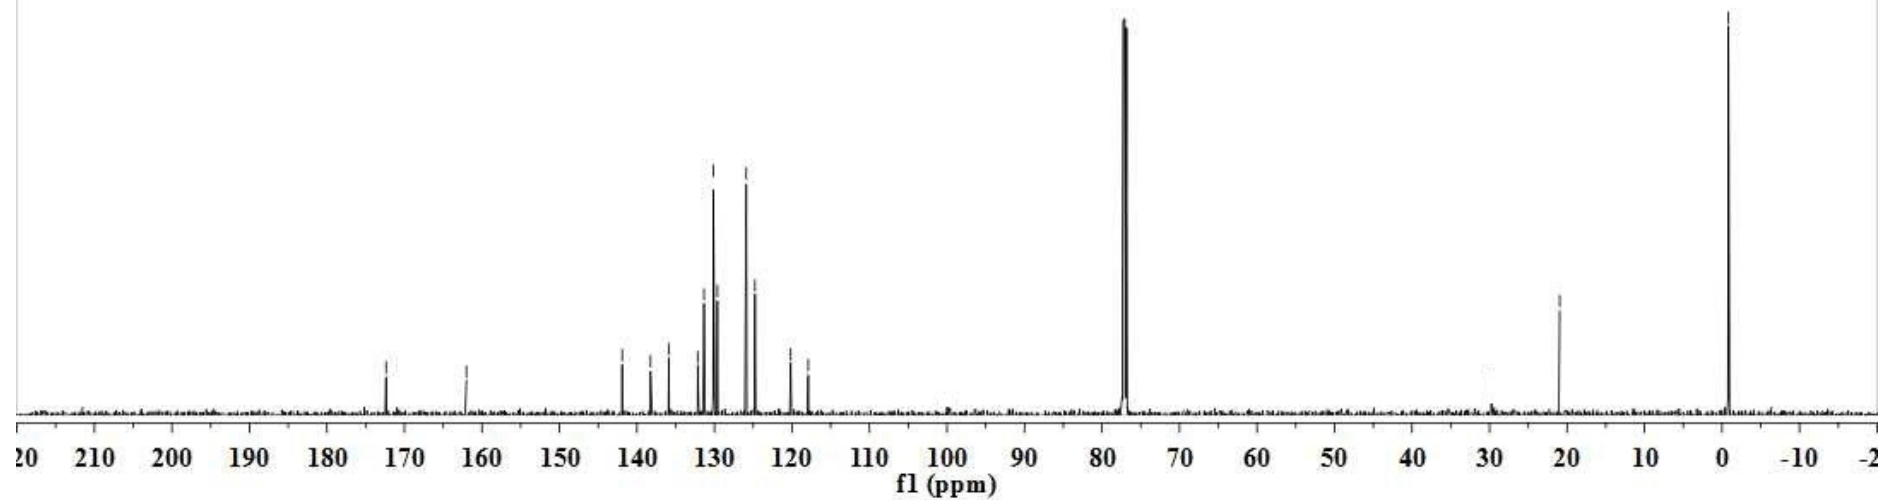

1129-3-DCL3-H

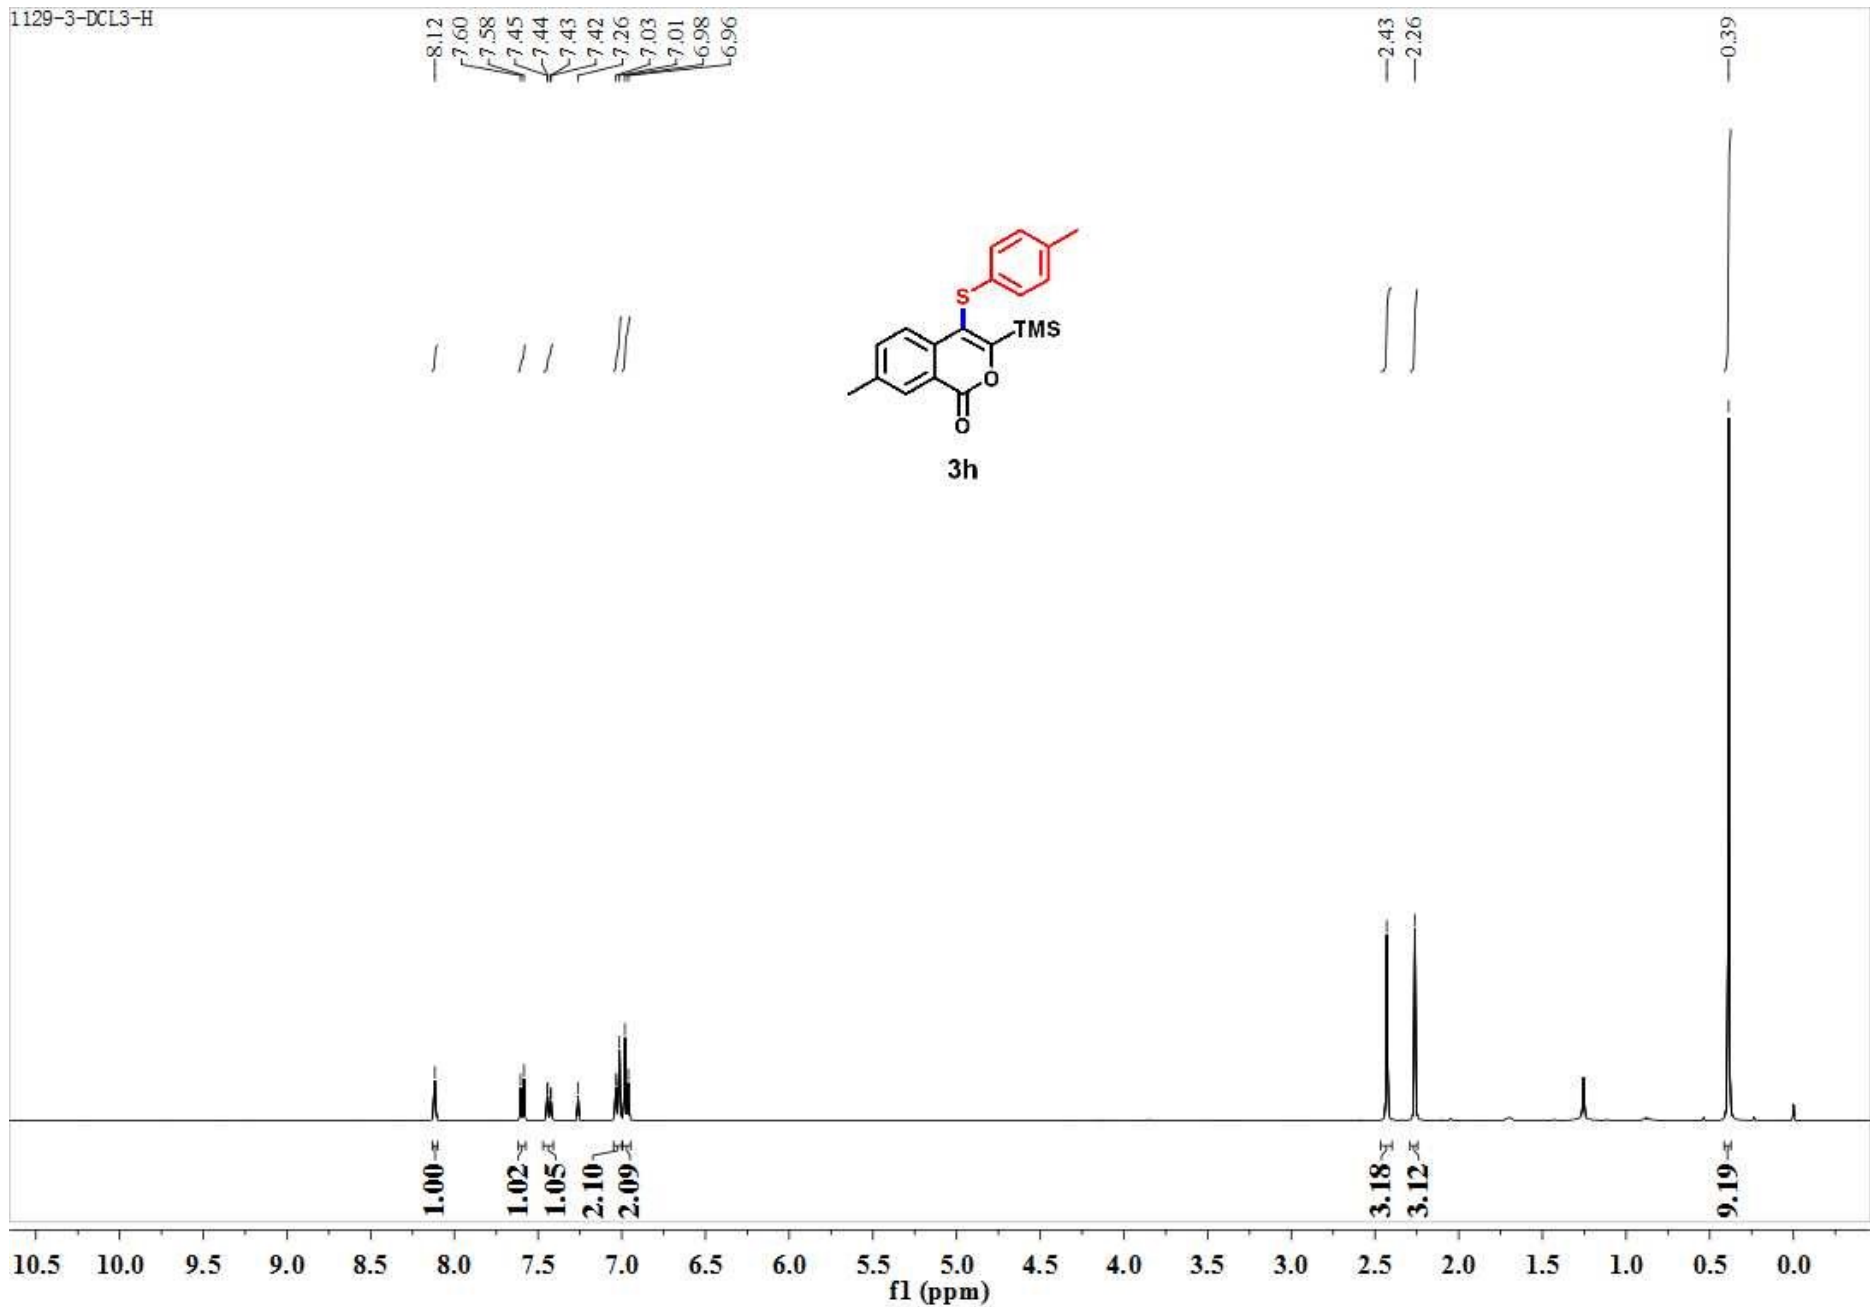

1129-3-CDCL3-C

—170.07

—163.77

140.23

136.88

136.20

134.85

133.65

130.67

130.04

126.60

125.76

122.48

119.61

22.05

21.64

—0.00

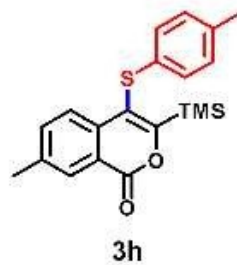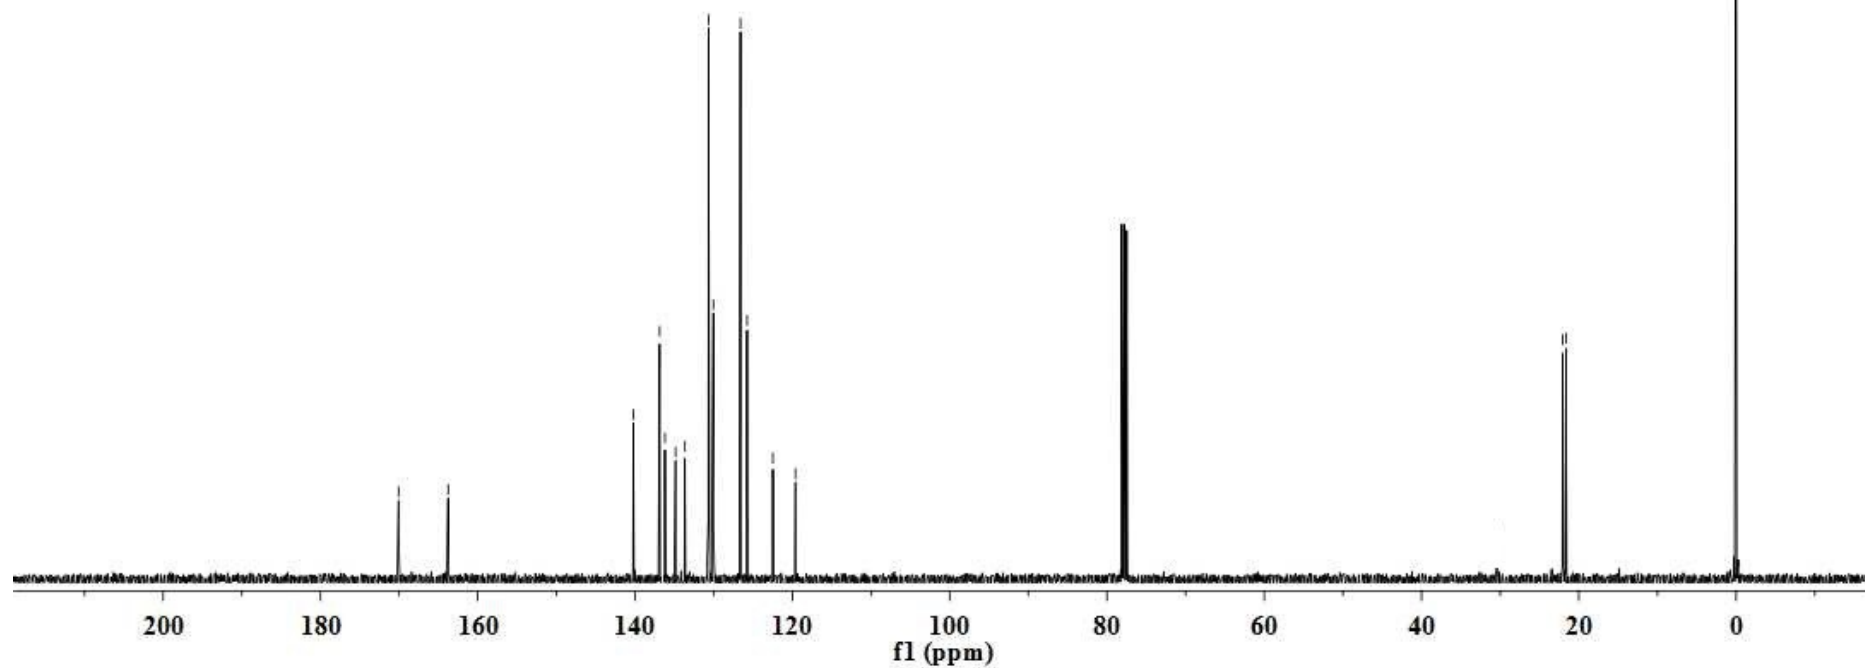

1018-3-DCL3-H

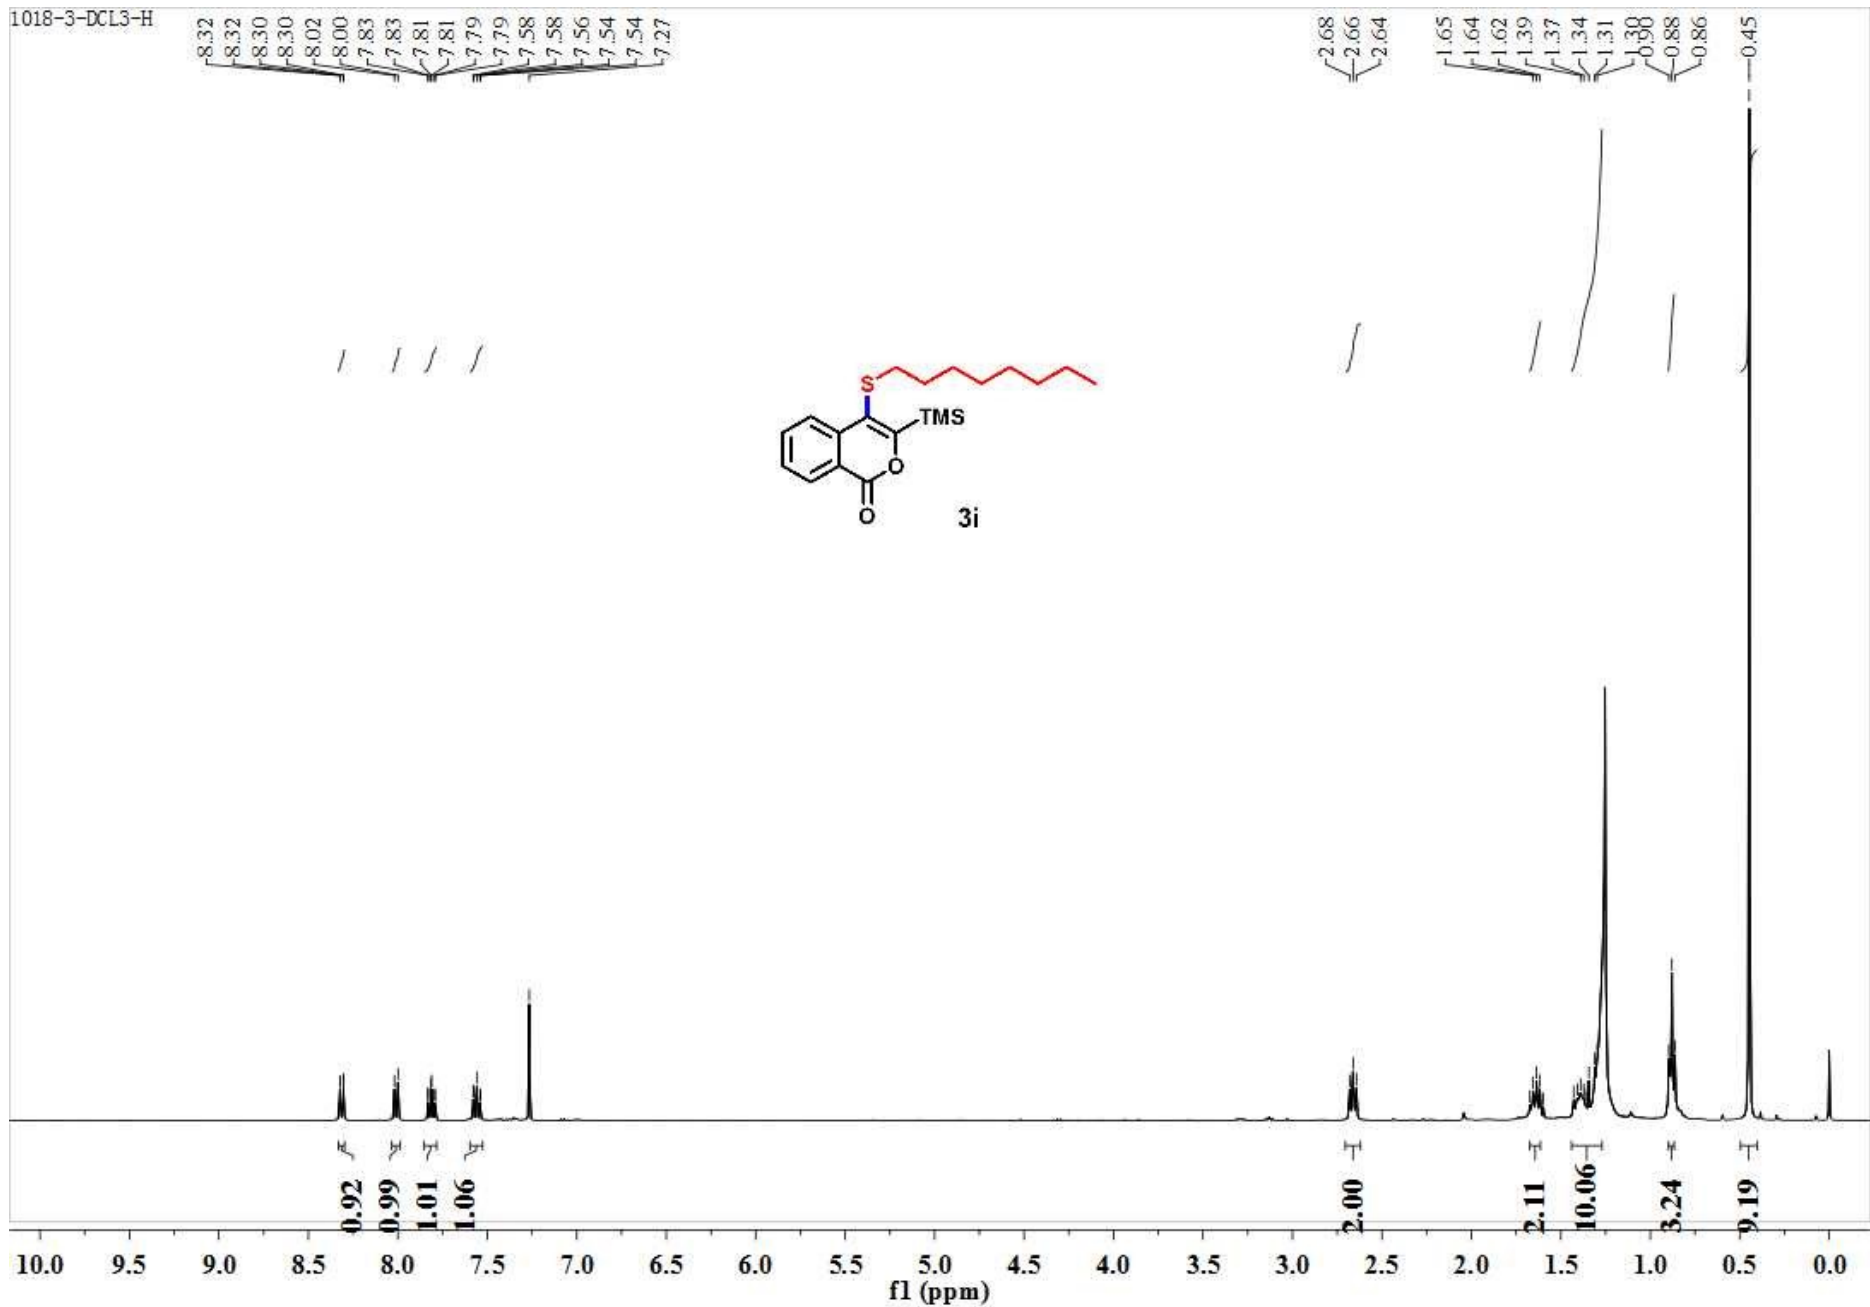

1018-3-CDCl3-C

—168.75  
—163.40

—137.45  
—135.15  
—130.15  
—129.29  
—125.19  
—122.76  
—122.28

—37.36  
—32.21  
—30.14  
—29.64  
—29.60  
—29.49  
—23.06

—14.52

—0.00

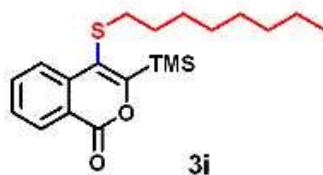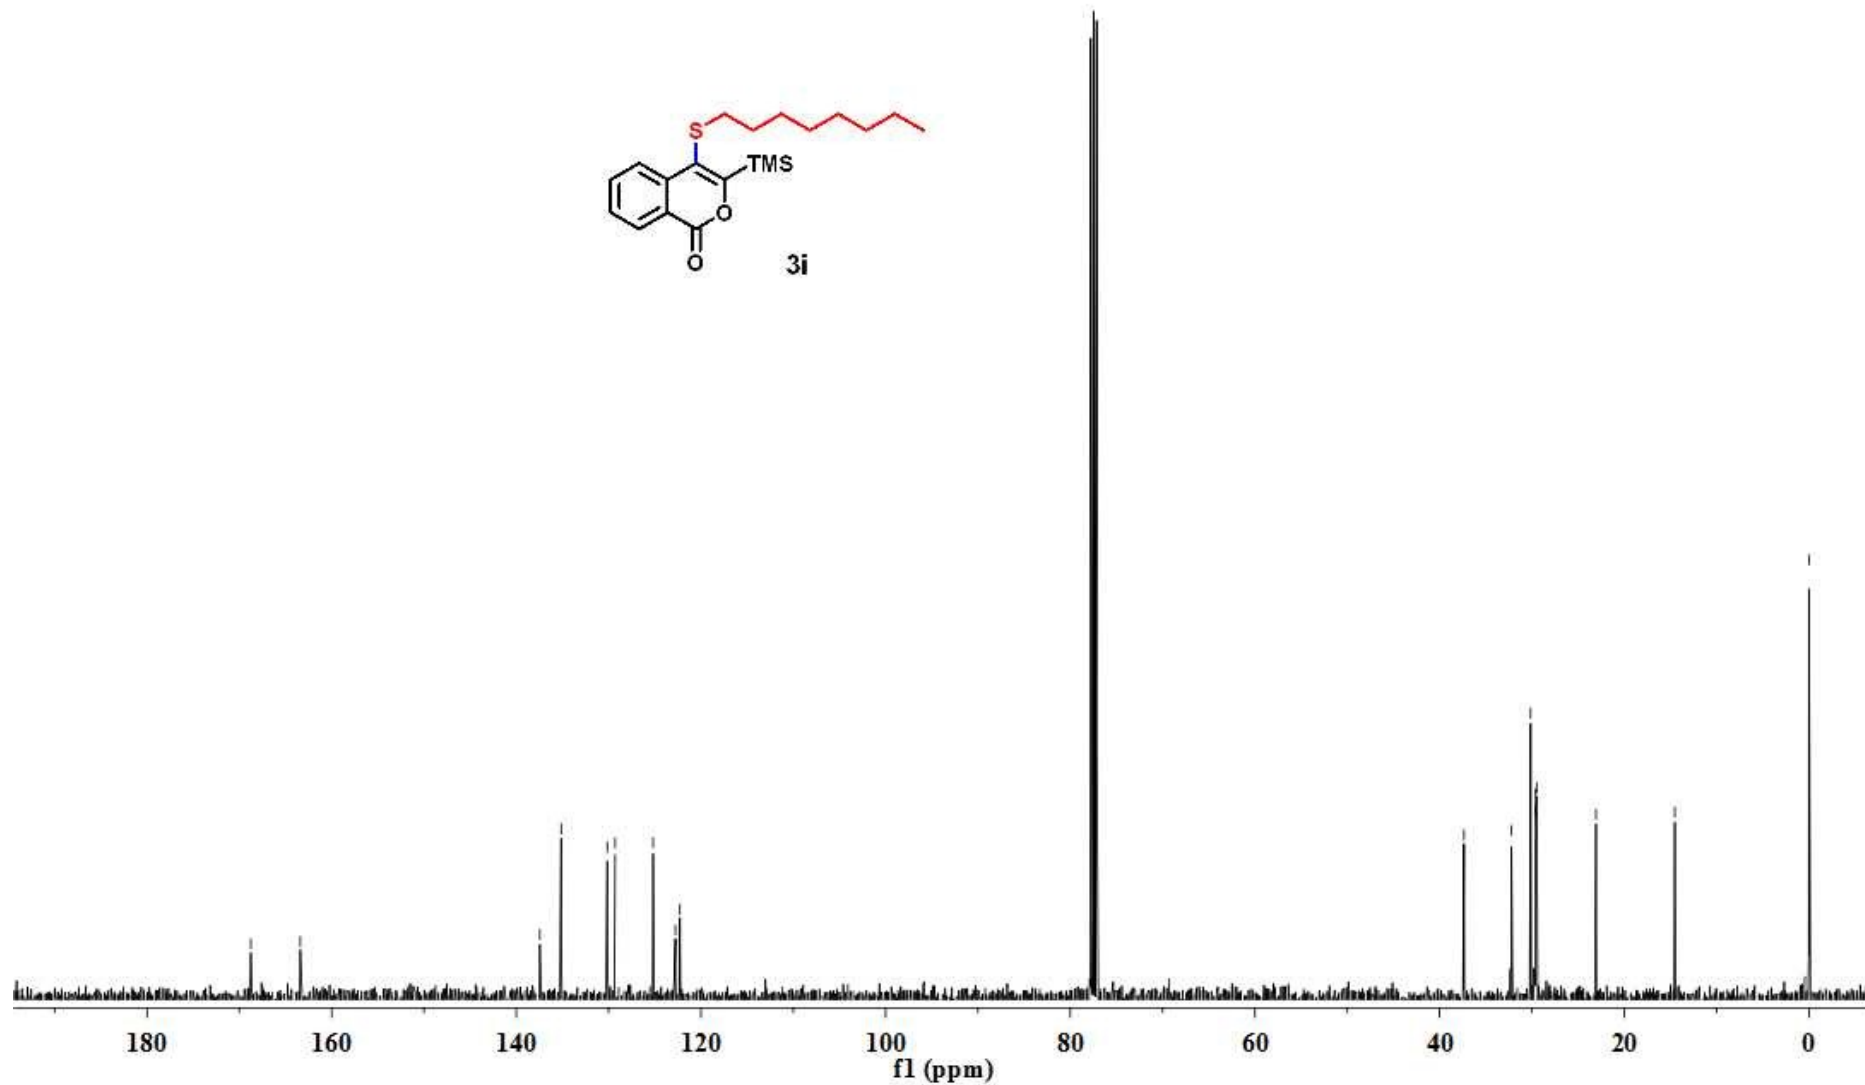



20220901-14

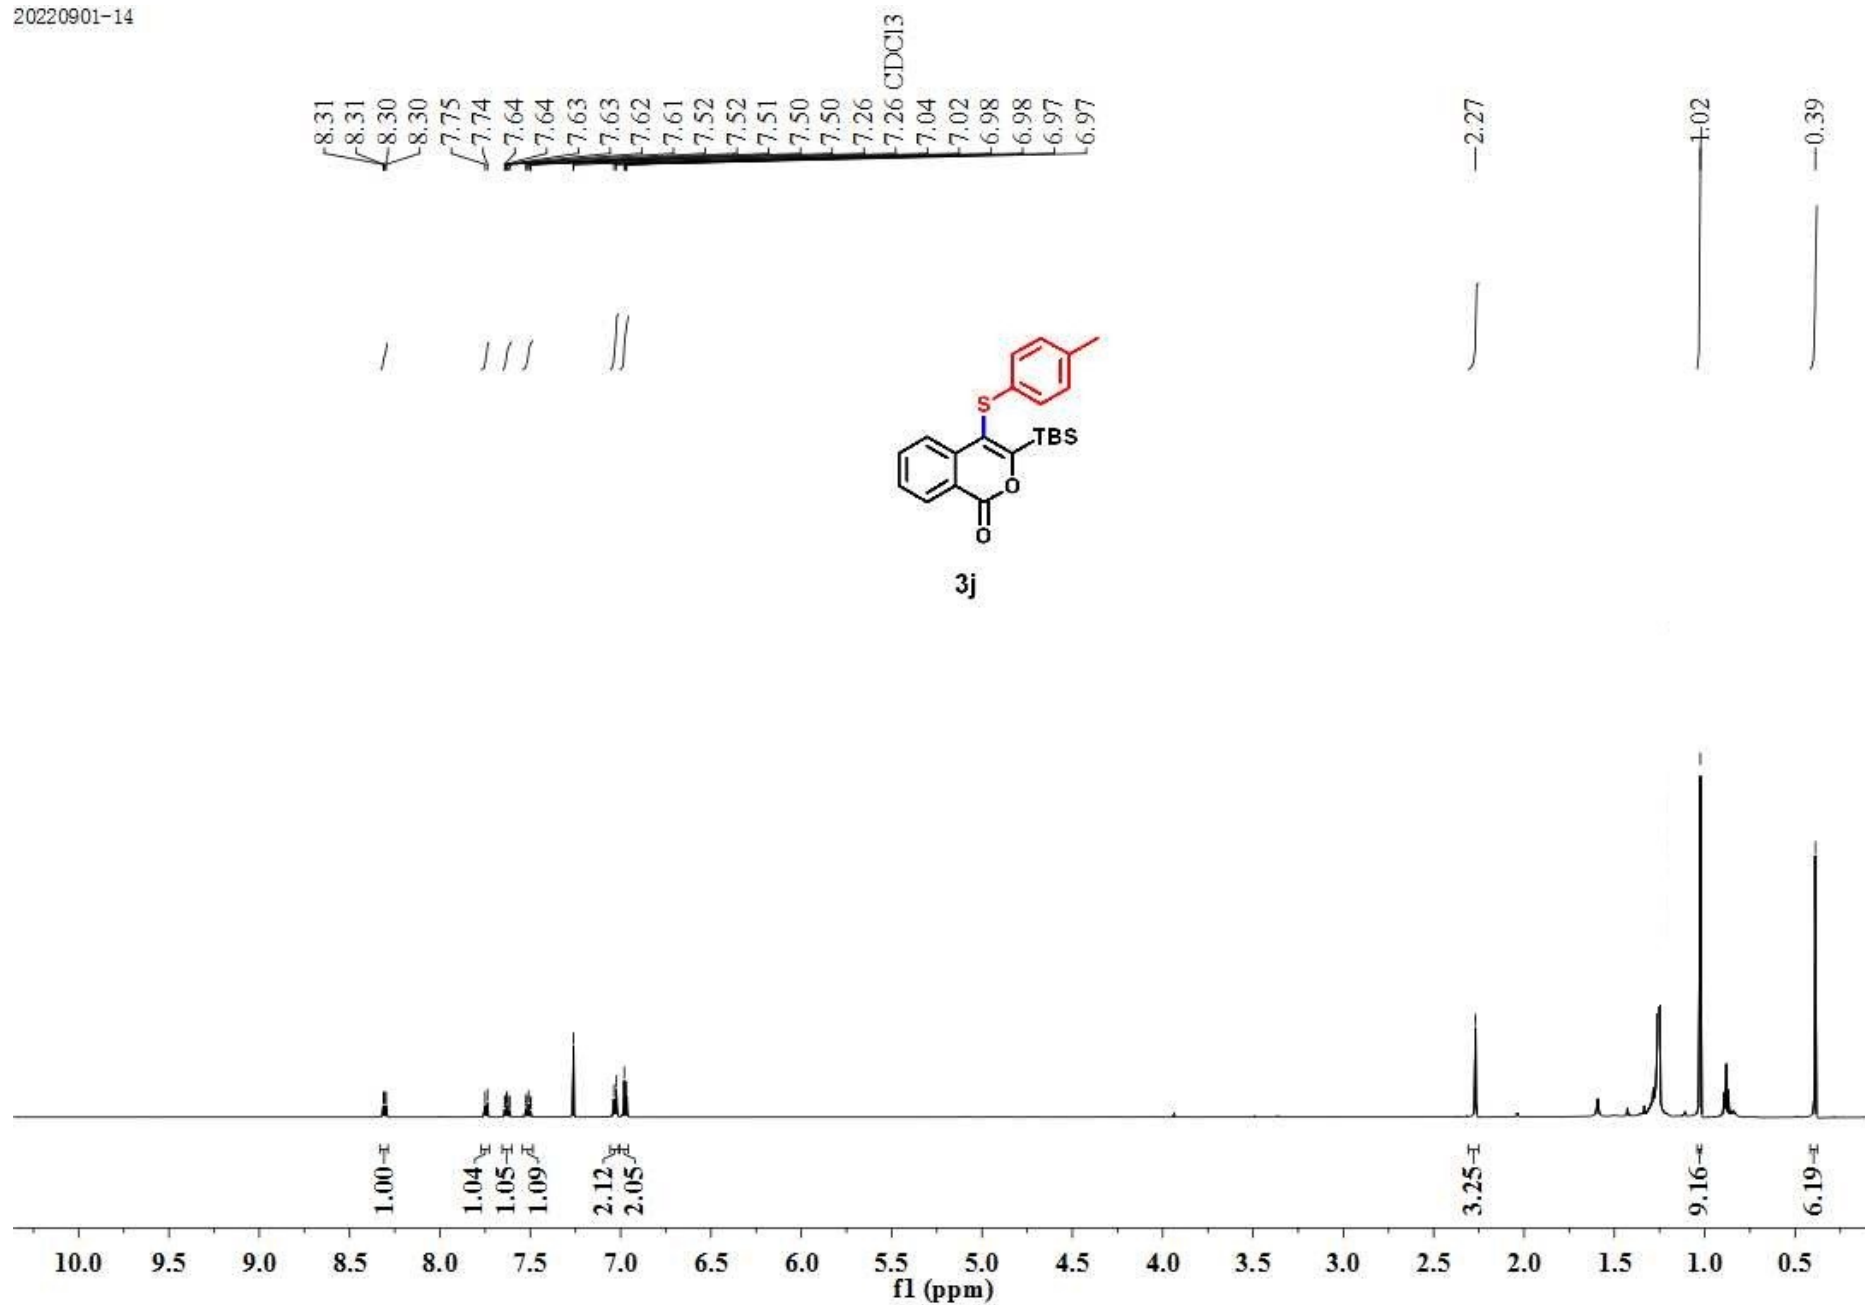

—169.88

—162.65

136.74

135.56

134.98

133.27

130.10

129.61

129.23

125.92

125.57

121.92

119.73

—77.16 CDCl<sub>3</sub>

—29.85

—27.14

—18.17

—14.27

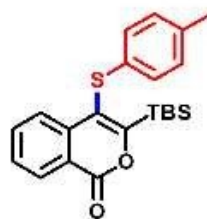

3j

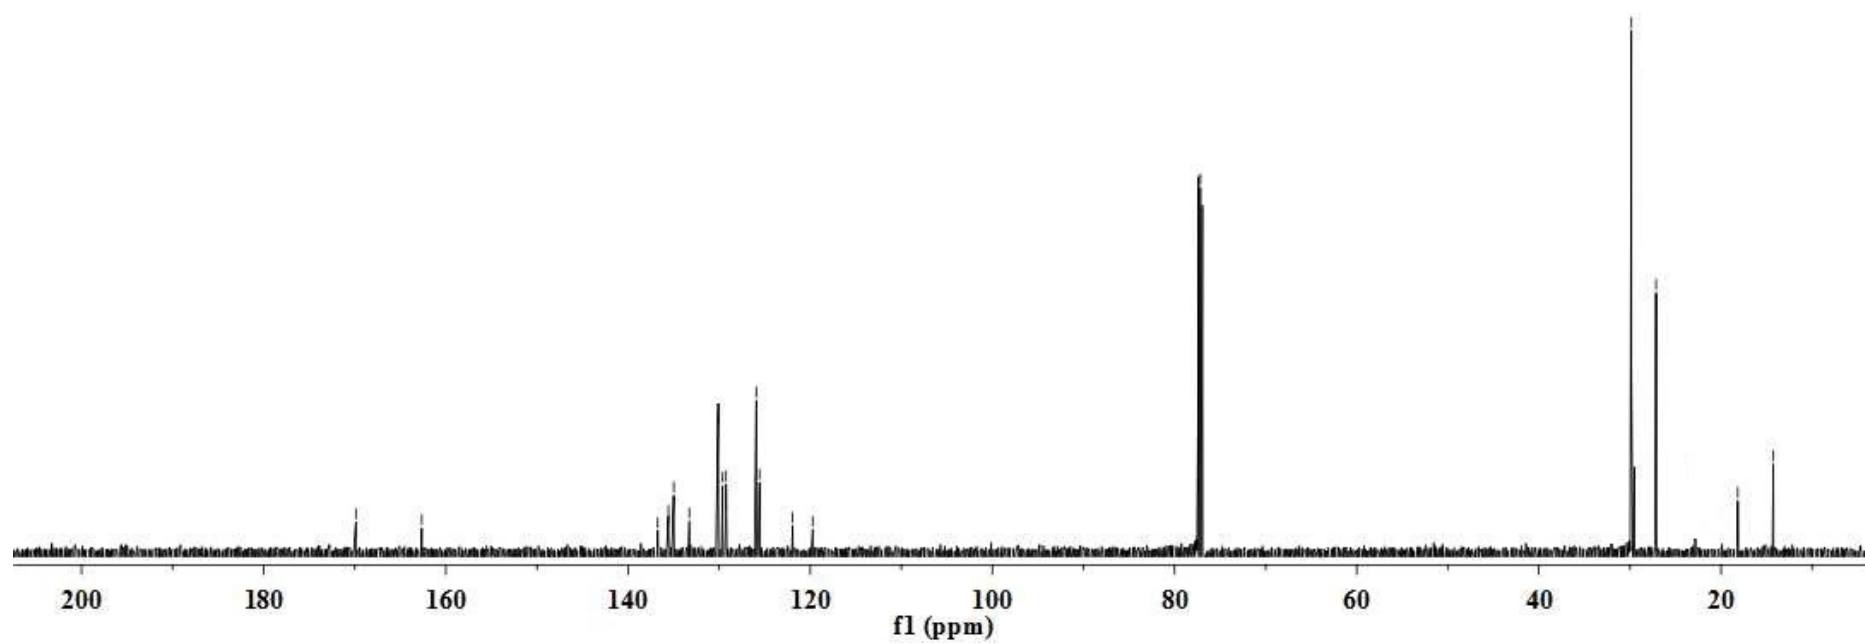

20220901-09

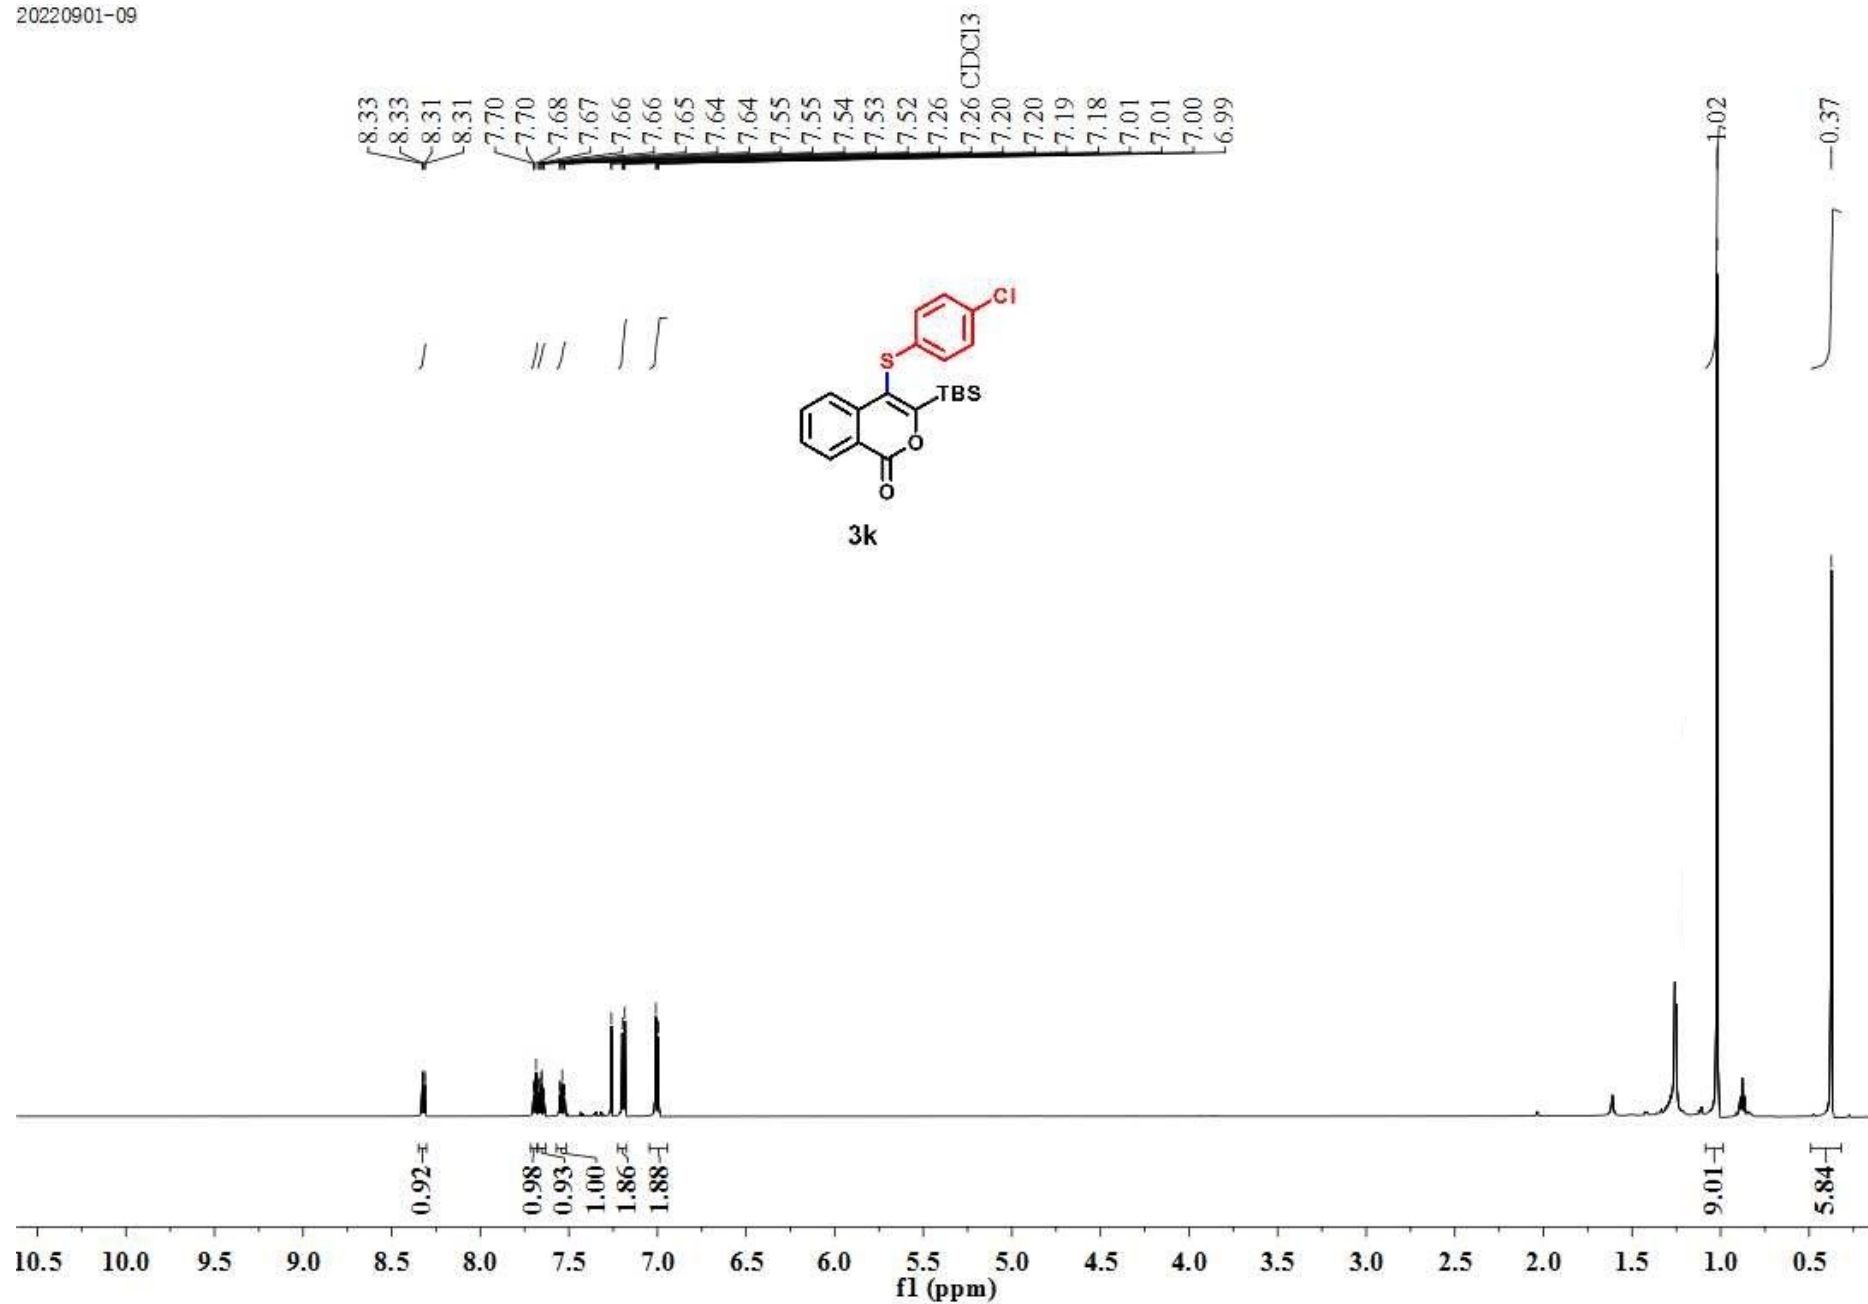

—170.62

—162.35

136.29

135.54

135.13

131.62

129.79

129.49

126.98

125.26

121.90

118.95

—77.16 CDCl<sub>3</sub>

—29.83

—27.09

—18.14

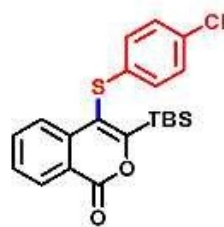

3k

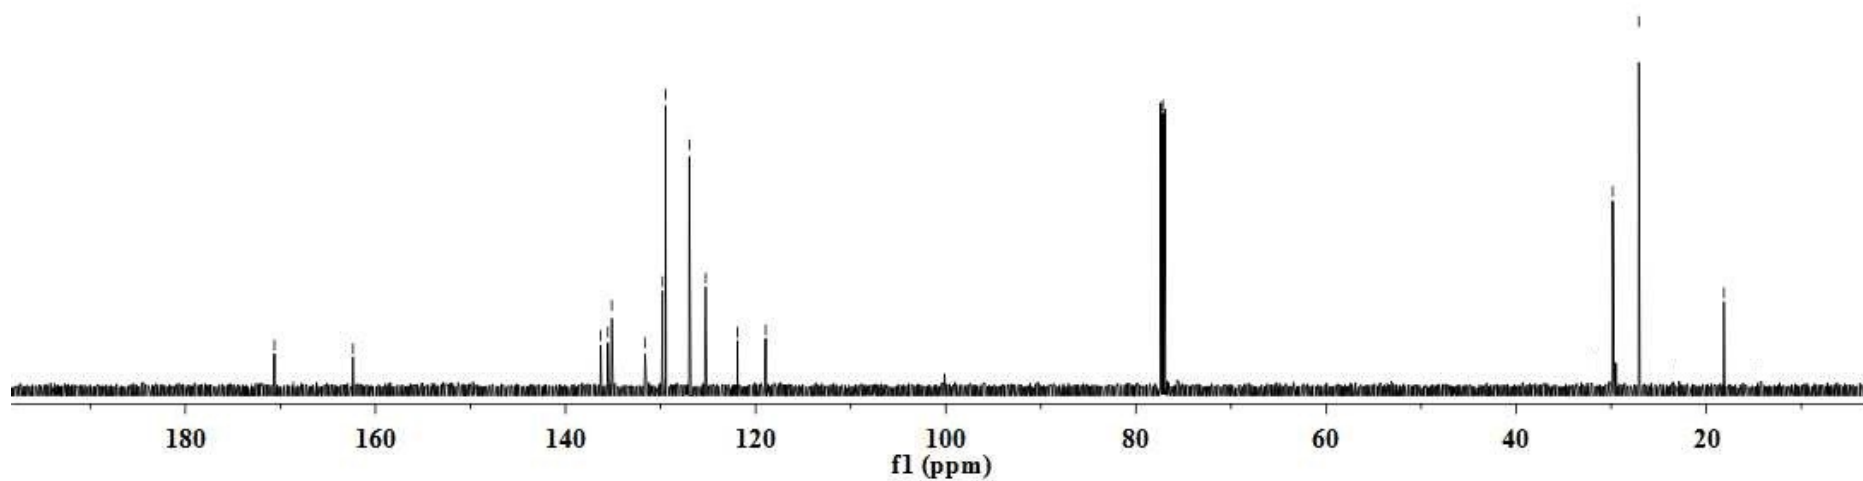

20220901-12

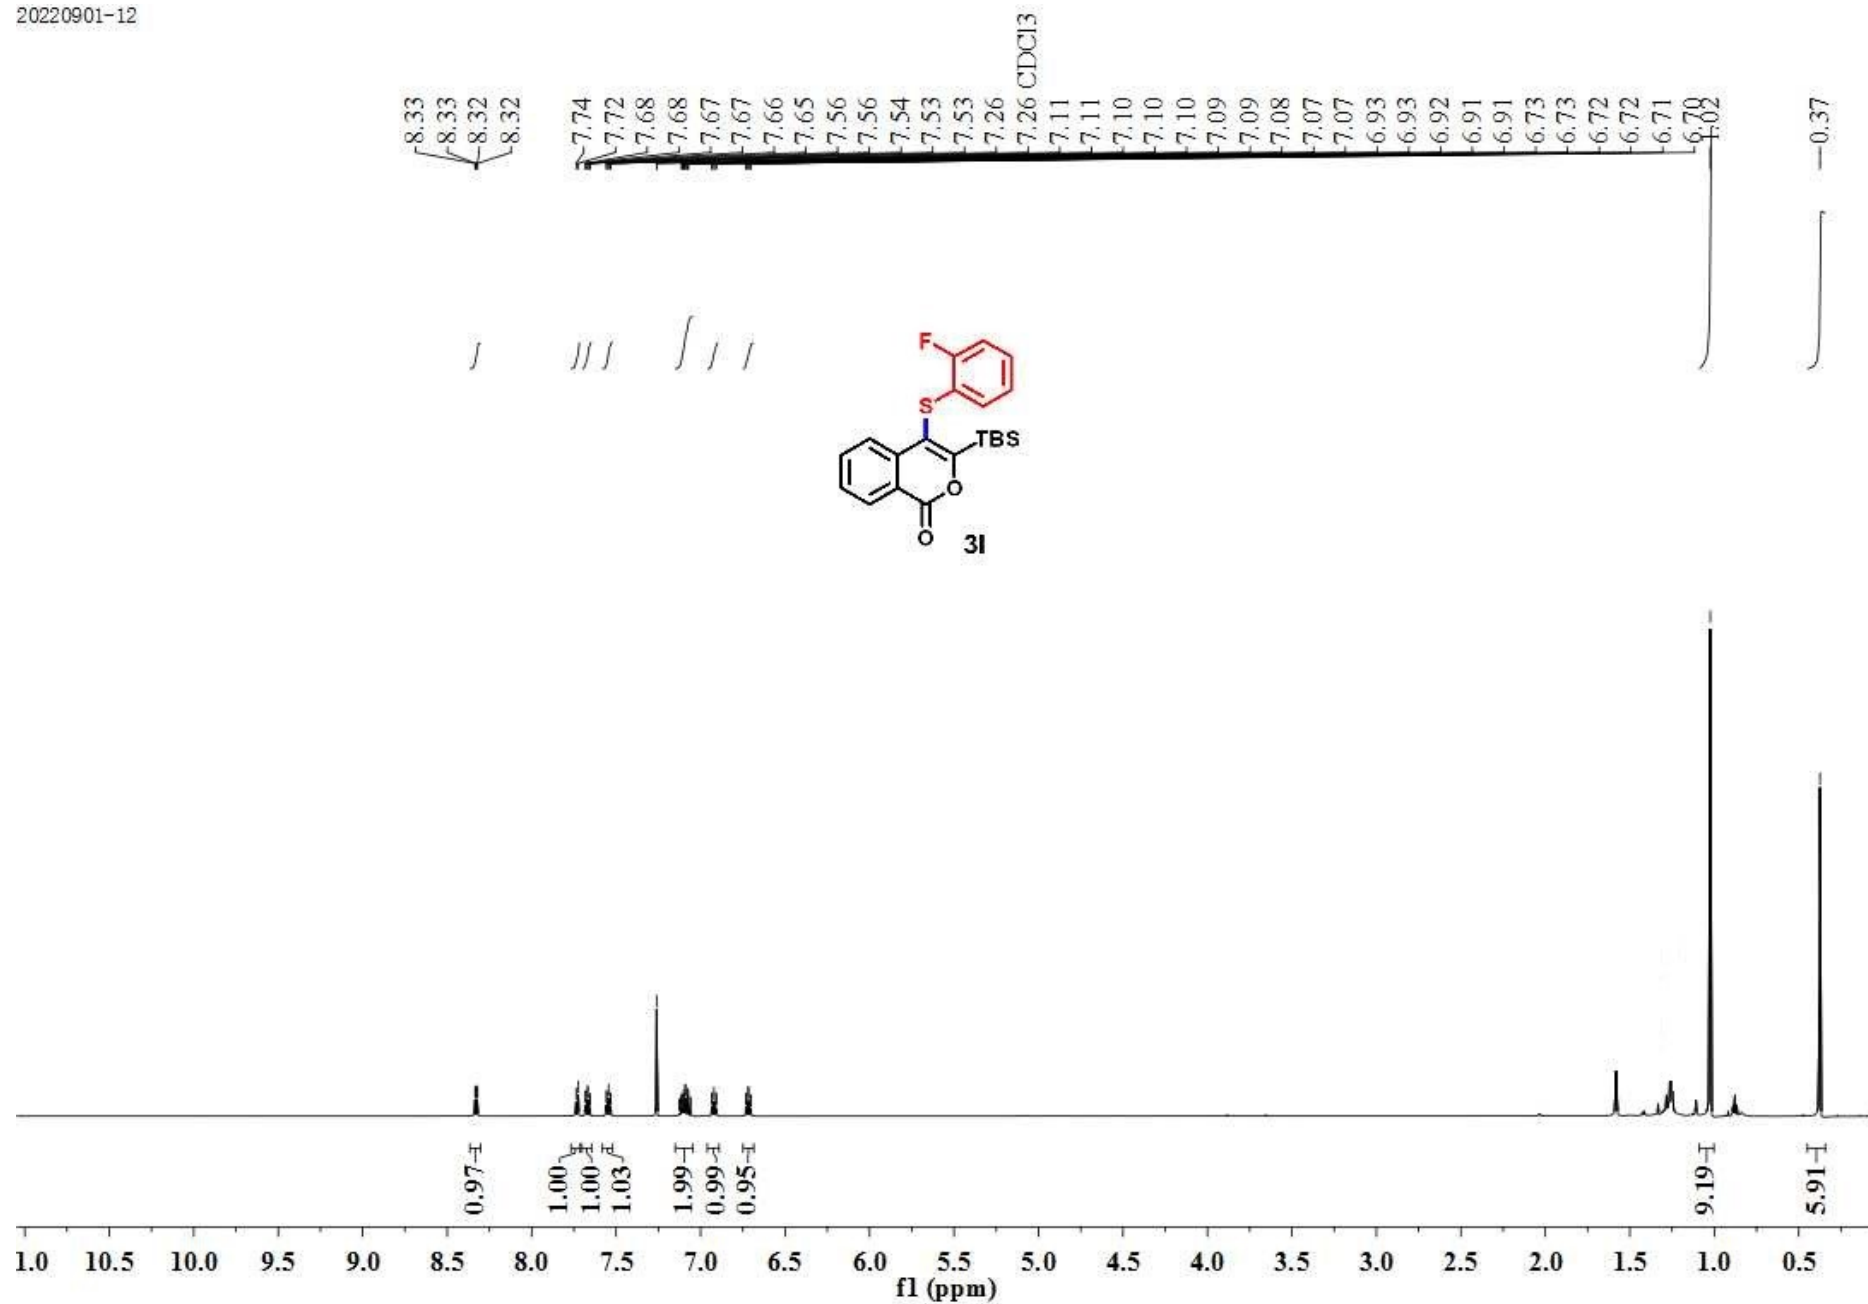

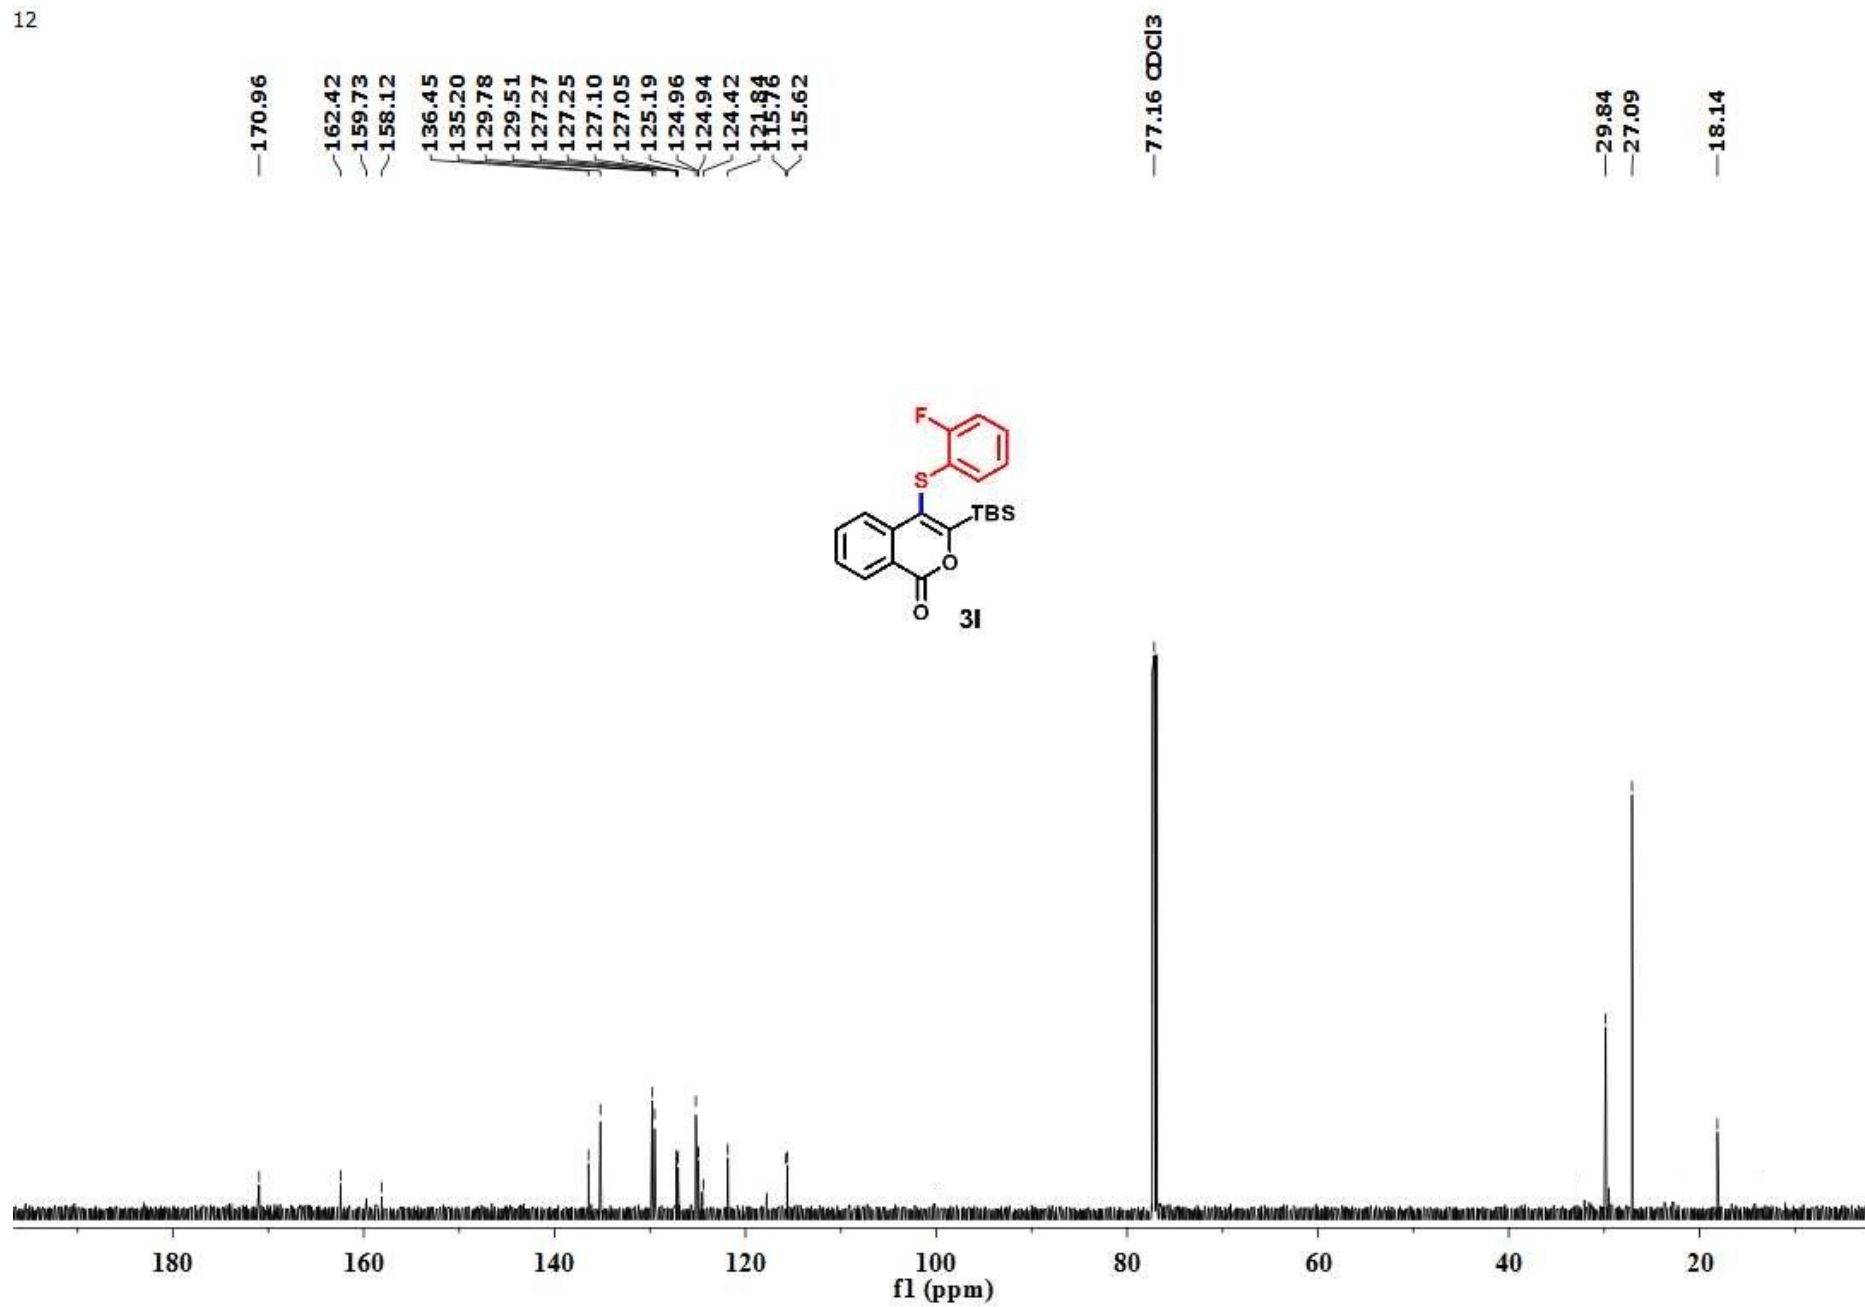

1sw-02

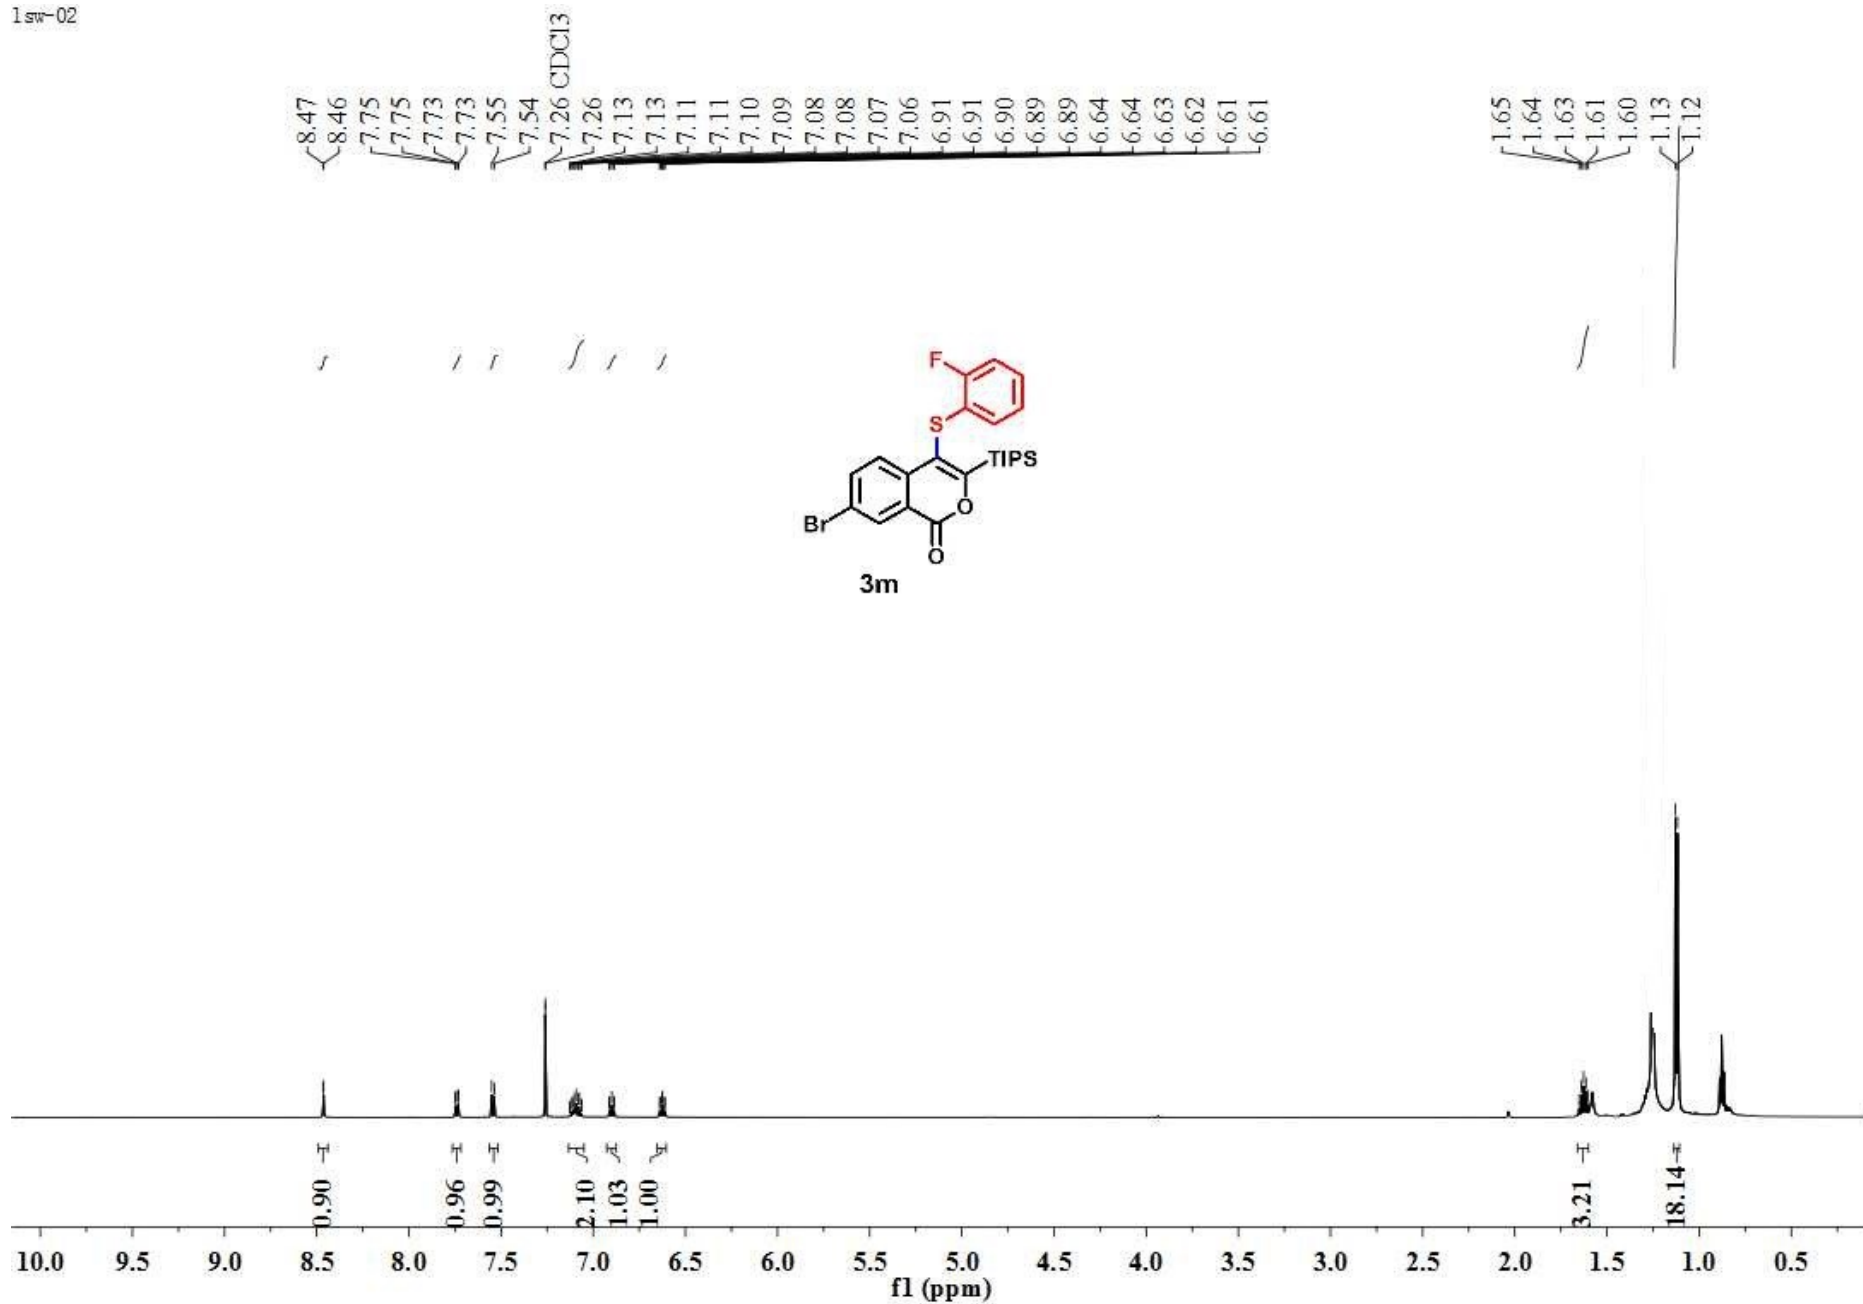

171.17  
159.54  
157.92  
138.10  
135.01  
132.13  
127.23  
127.19  
127.17  
127.06  
127.01  
124.73  
124.71  
123.15  
122.77  
115.72  
115.59

29.72

18.86

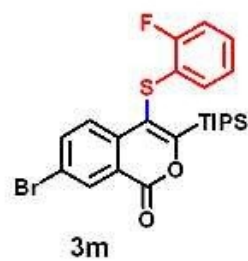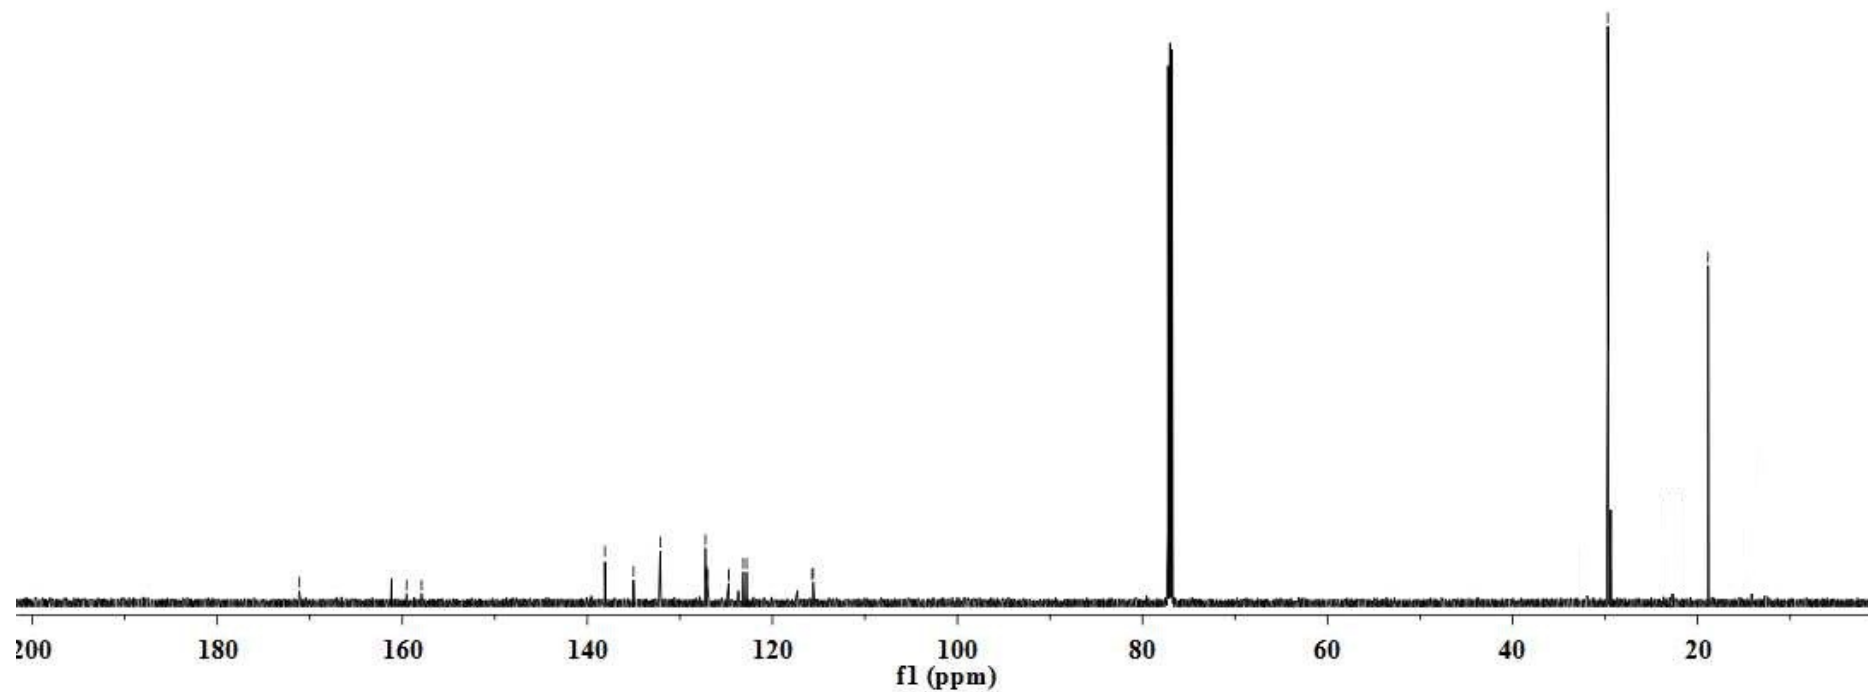



1sw-01

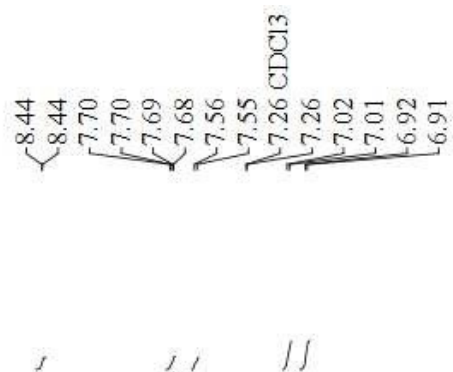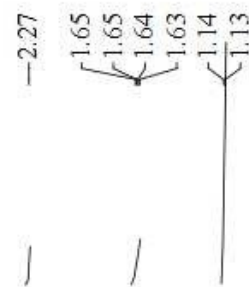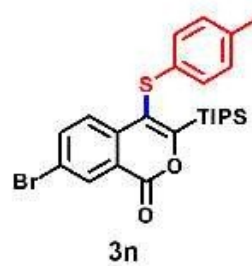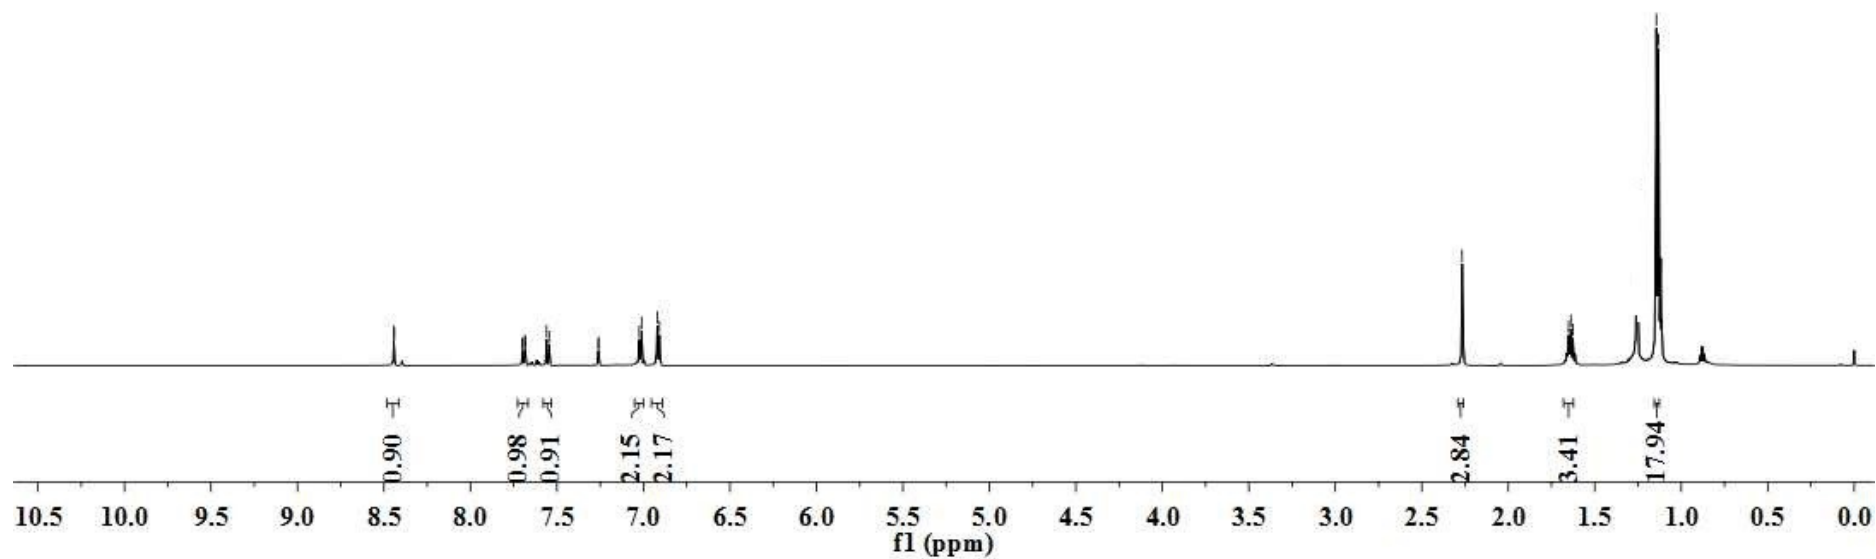

lsw-01-bb

—170.03

—161.52

137.98

135.64

135.37

132.54

132.04

130.10

127.77

125.94

123.01

122.97

119.47

—77.16 CDCl<sub>3</sub>

—29.83

—19.04

—12.72

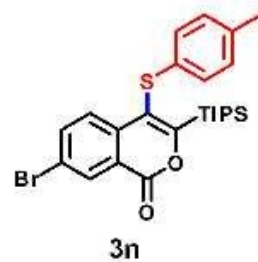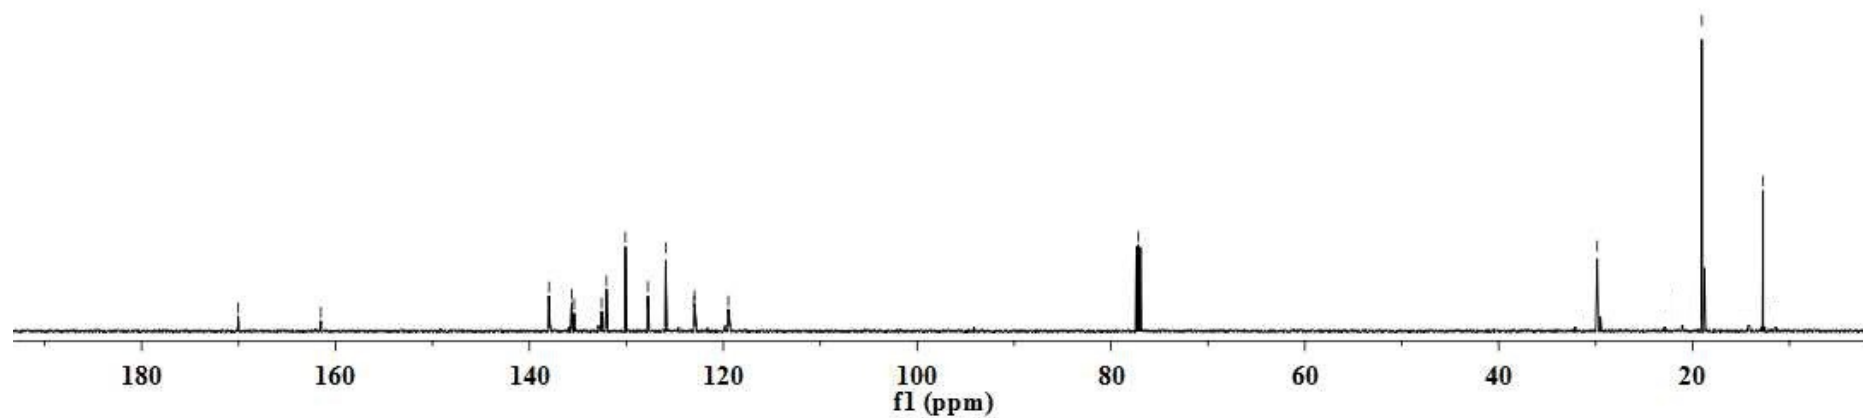

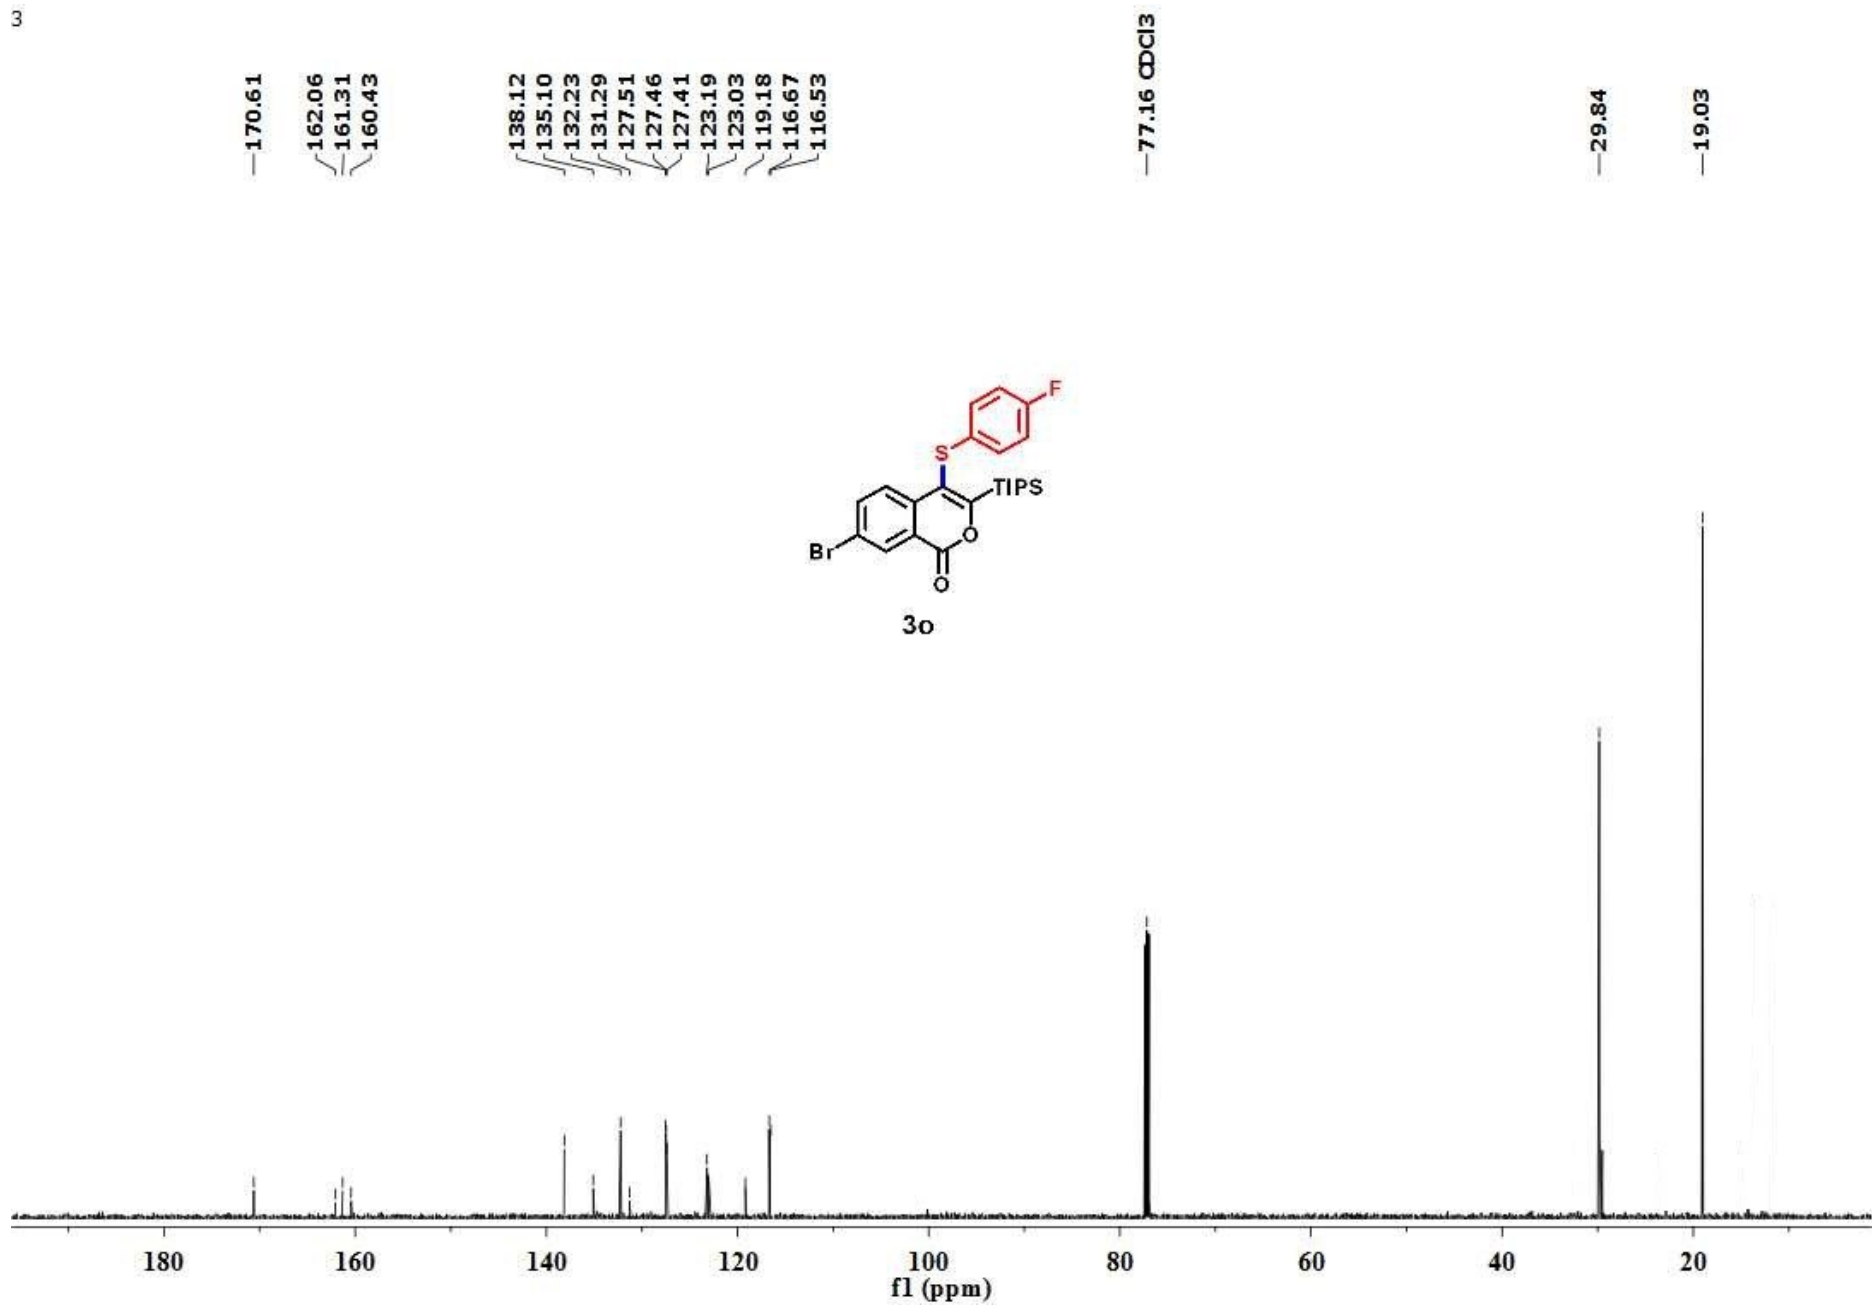

1sw-06

8.48  
8.48  
7.76  
7.76  
7.75  
7.75  
7.54  
7.52  
7.22  
7.20  
6.97  
6.96

1.67  
1.66  
1.65  
1.65  
1.64  
1.64  
1.63  
1.62  
1.16  
1.15

s s s | |

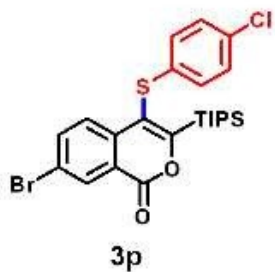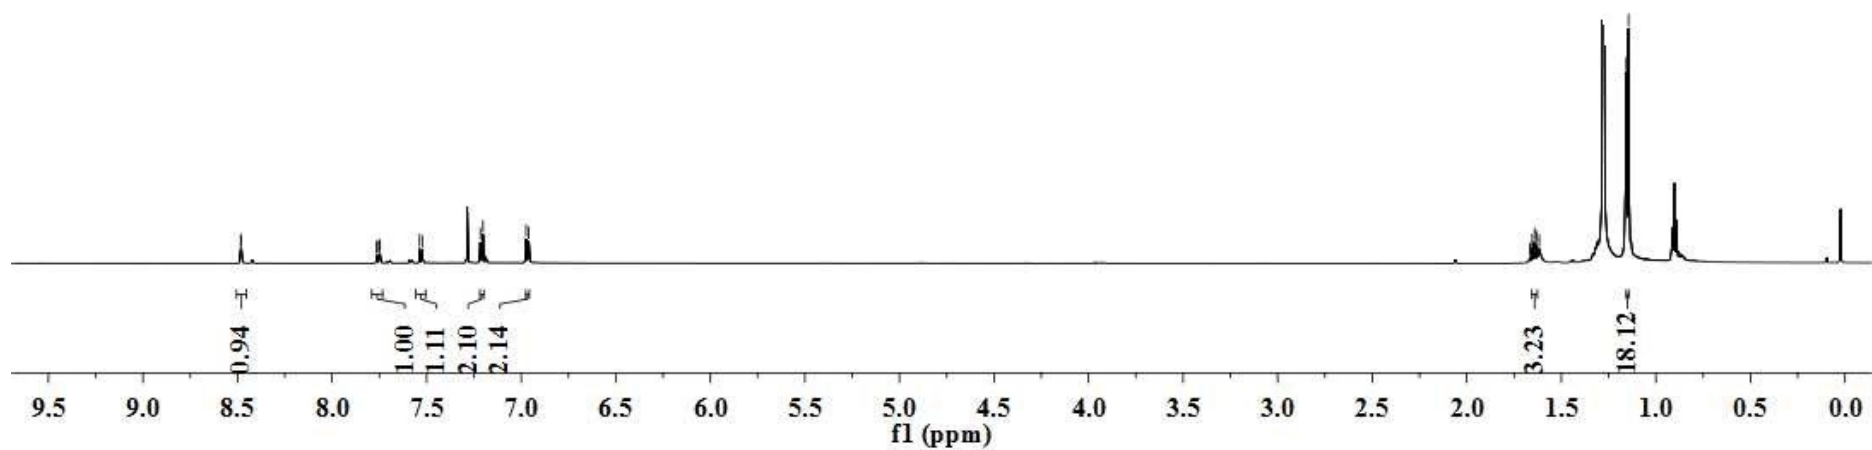

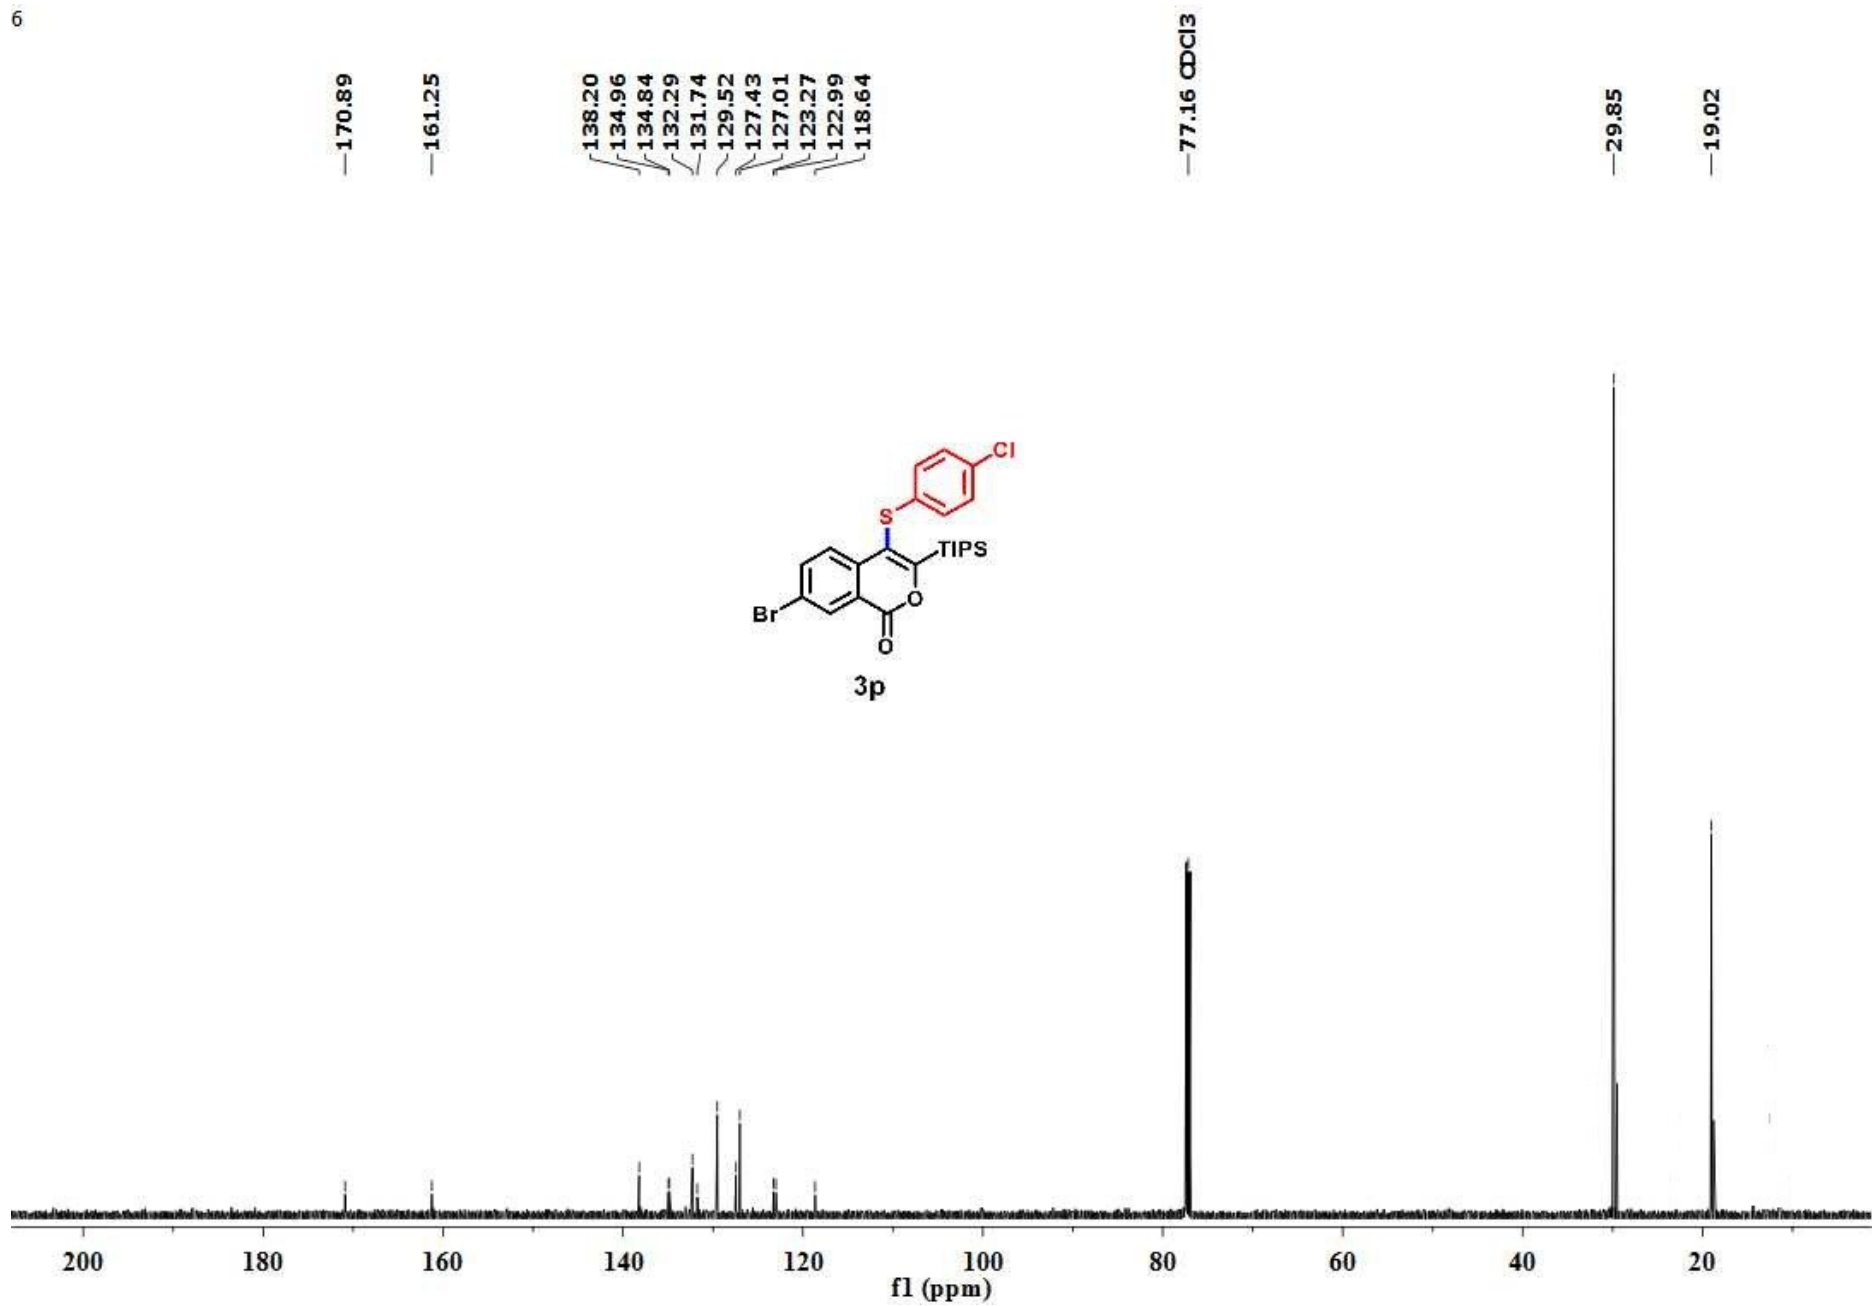

LSW-4H-S4CL

7.52  
7.51  
7.50  
7.42  
7.40  
7.36  
7.35  
7.34  
7.31  
7.26

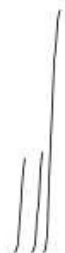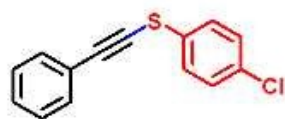

4a

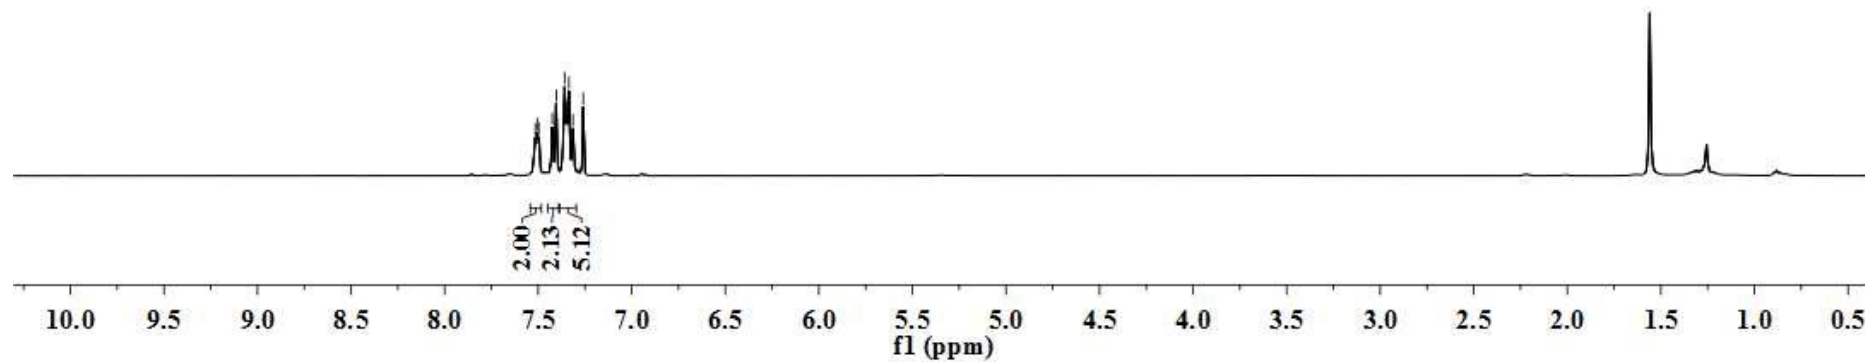

LSW-4H-S4CL

132.53  
131.83  
131.59  
129.40  
128.89  
128.46  
127.49  
122.63

98.40

74.77

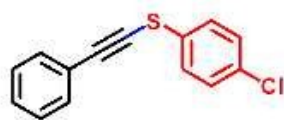

4a

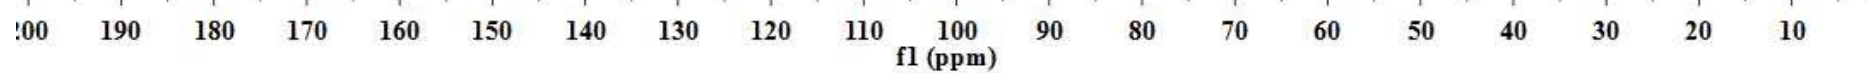

LSW-4H-S2F

7.70  
7.69  
7.67  
7.67  
7.53  
7.52  
7.51  
7.36  
7.35  
7.26  
7.24  
7.22  
7.21  
7.19  
7.17  
7.09  
7.07  
7.04

—1.56

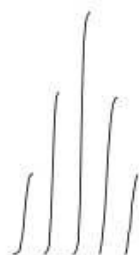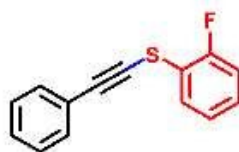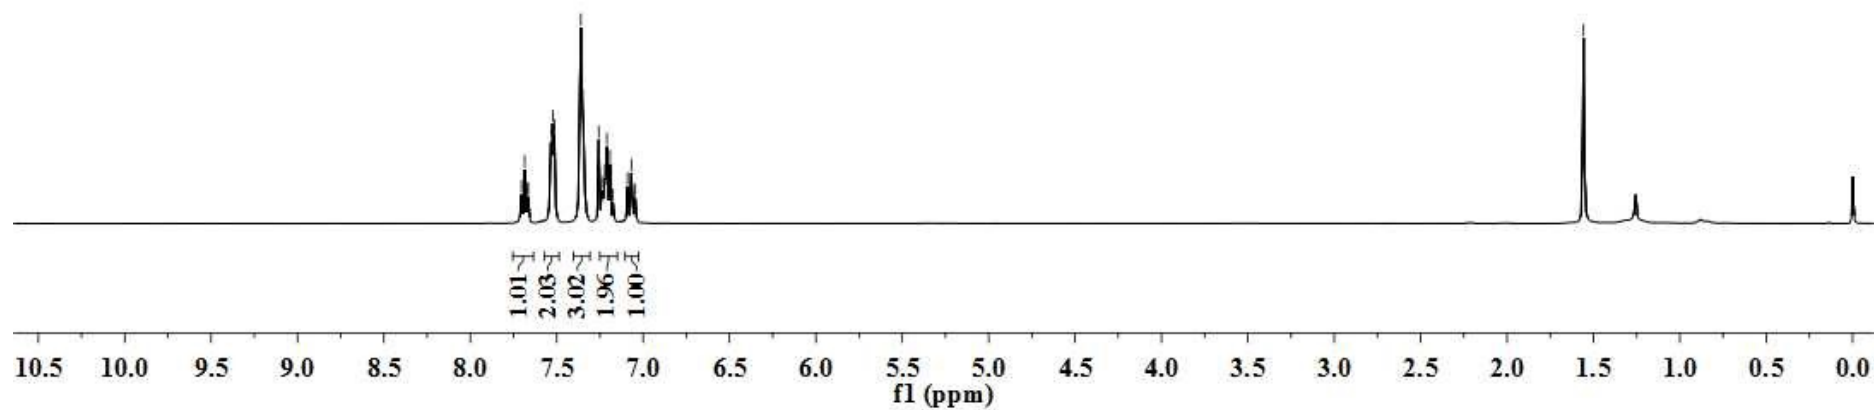



1sw-4h-s4f

~159.71  
~158.08

131.90  
128.91  
128.46  
128.29  
128.27  
128.16  
128.12  
125.05  
125.03  
120.57  
120.46  
115.52  
115.39

—98.27

—73.55

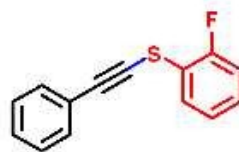

4b

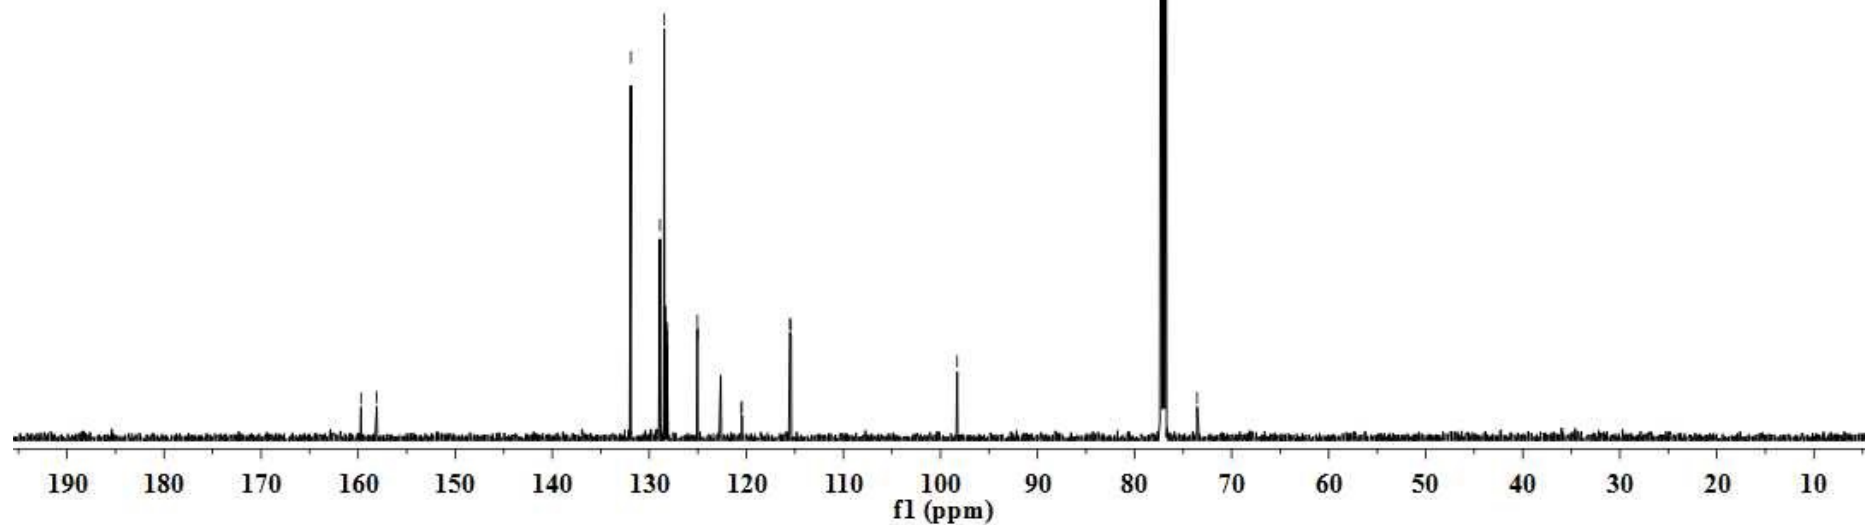

LSW-4H-S4AC

7.95  
7.93  
7.56  
7.54  
7.53  
7.38  
7.37  
7.26

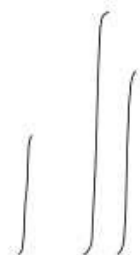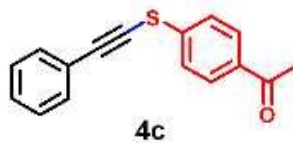

2.59

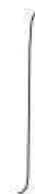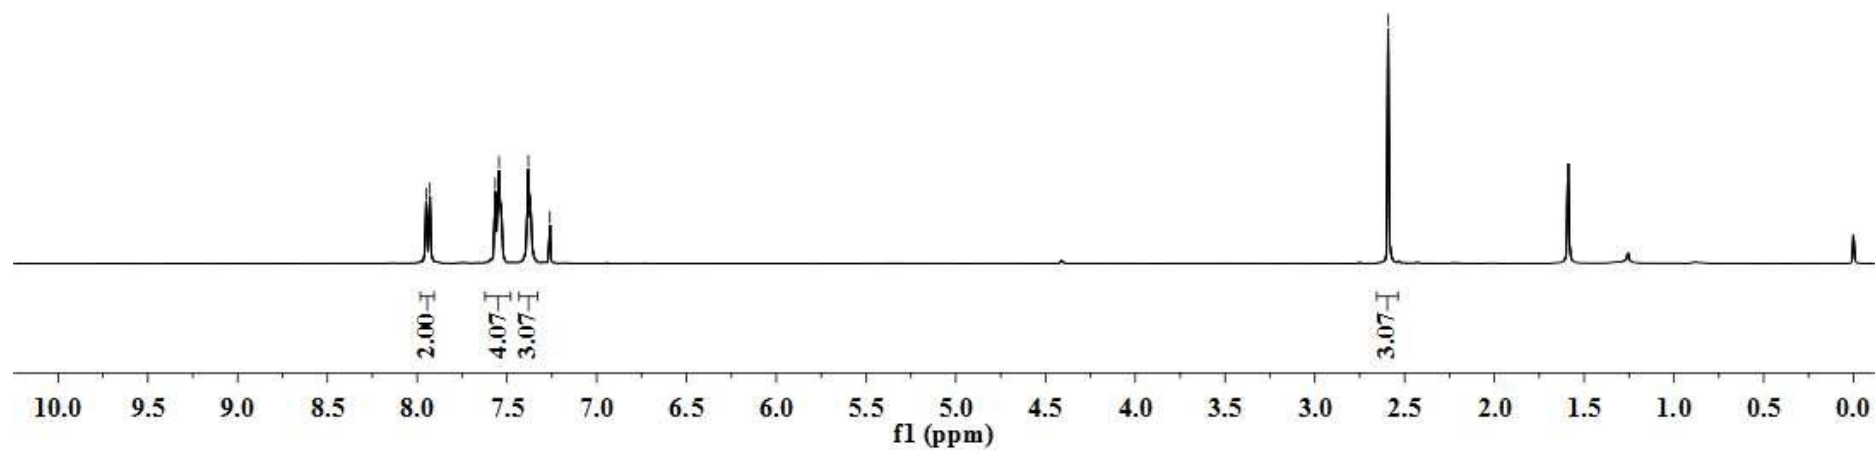

LSW-4H-SAC

—197.01

140.02  
135.16  
131.91  
129.13  
129.09  
128.52  
125.44  
122.43

—99.54

—73.59

—26.55

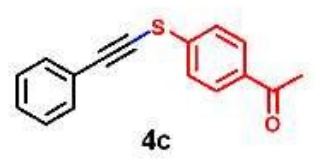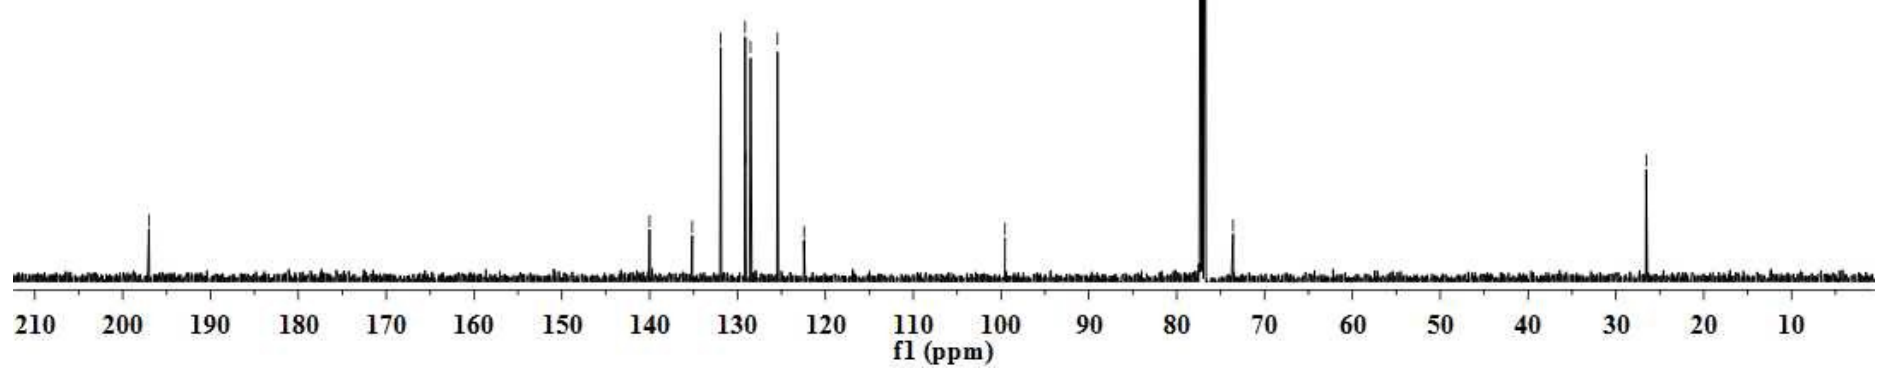

1sw-2br-scf3-1

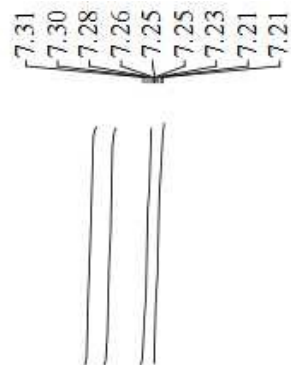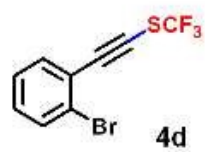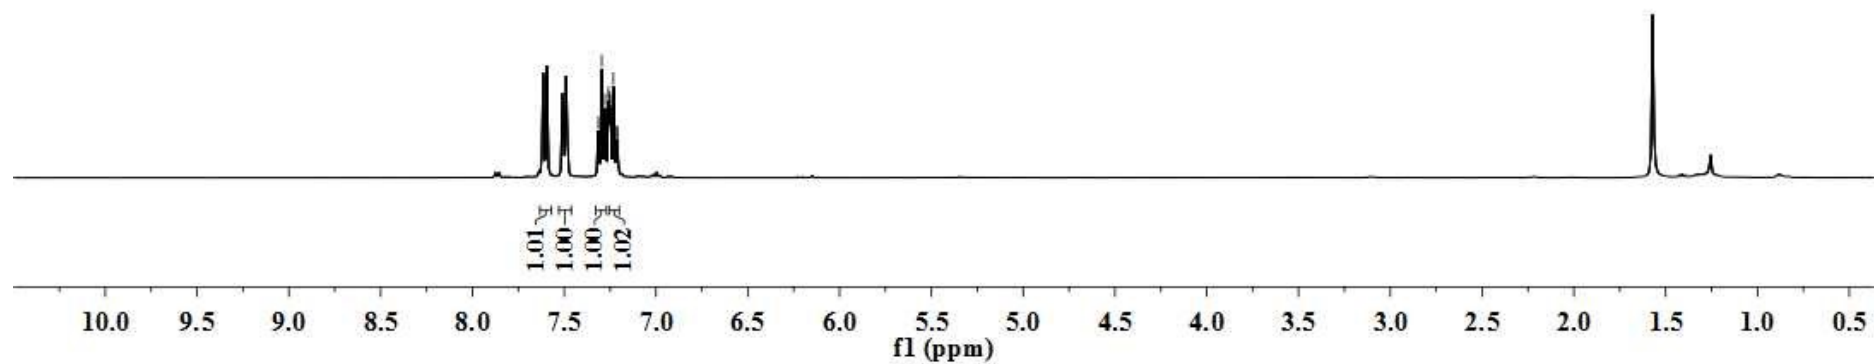

1sw-2br-scf3-1

—43.07

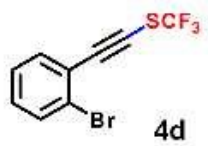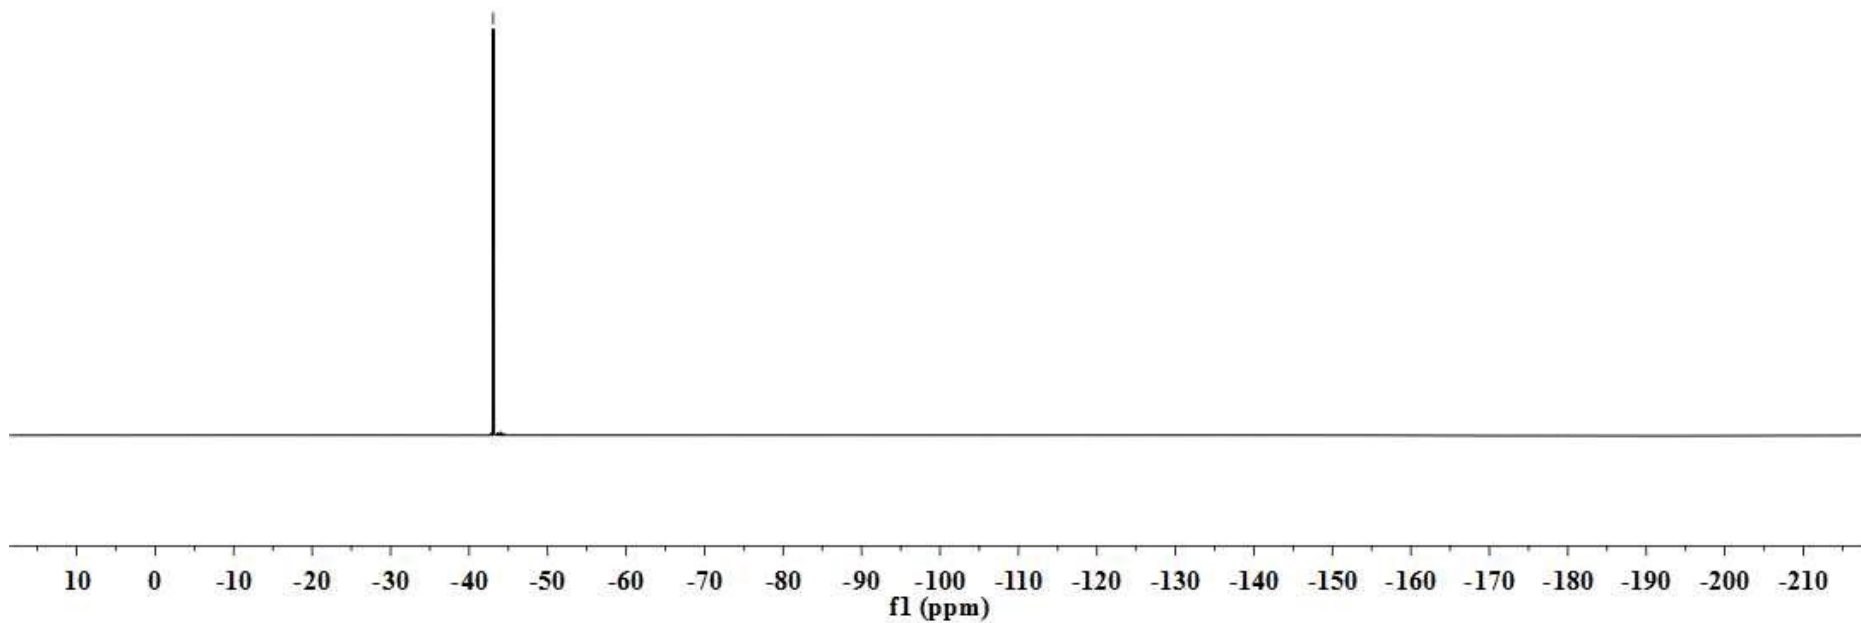

LSW-2Br-SCF3

133.62  
132.64  
131.15  
130.64  
129.00  
127.12  
126.92  
125.77  
124.81  
123.92

—99.73

71.68  
71.65  
71.62  
71.59

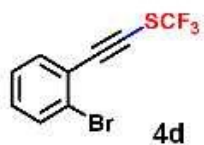

LSW-2Br-SCF3

71.68  
71.65  
71.62  
71.59

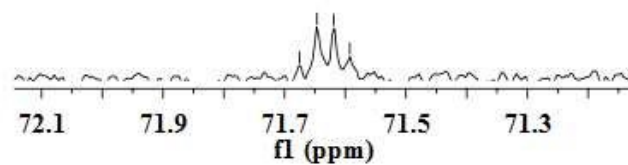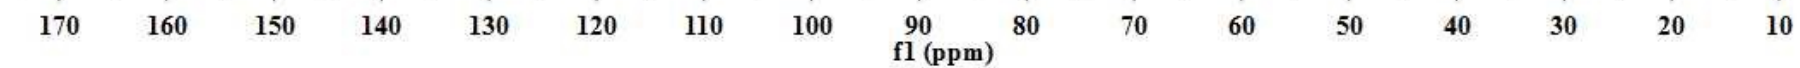

LSW-30H-SCF3

7.26  
7.24  
7.22  
7.20  
7.08  
7.06  
6.96  
6.89  
6.87

3.08

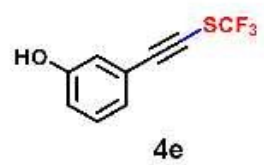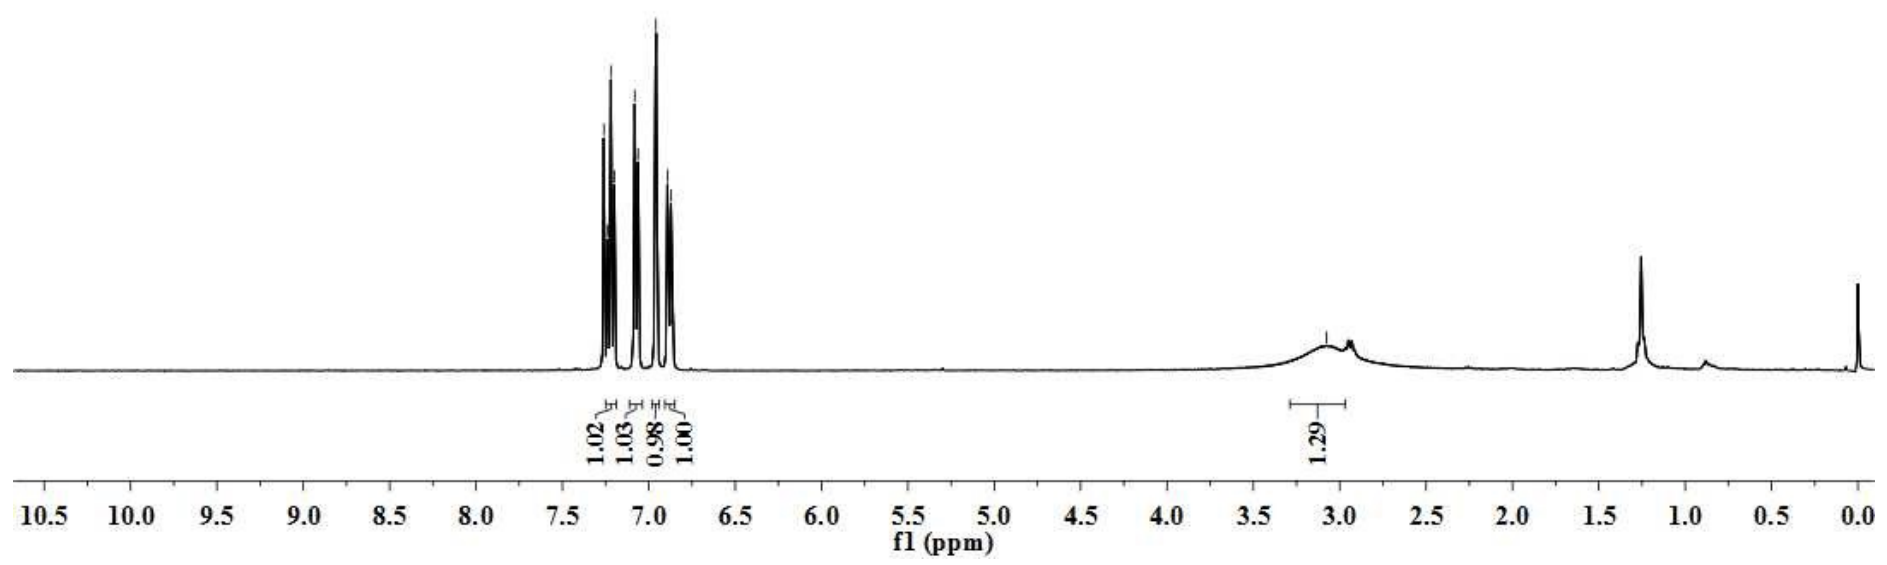

LSW-30H-SCF3

—43.55

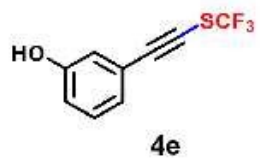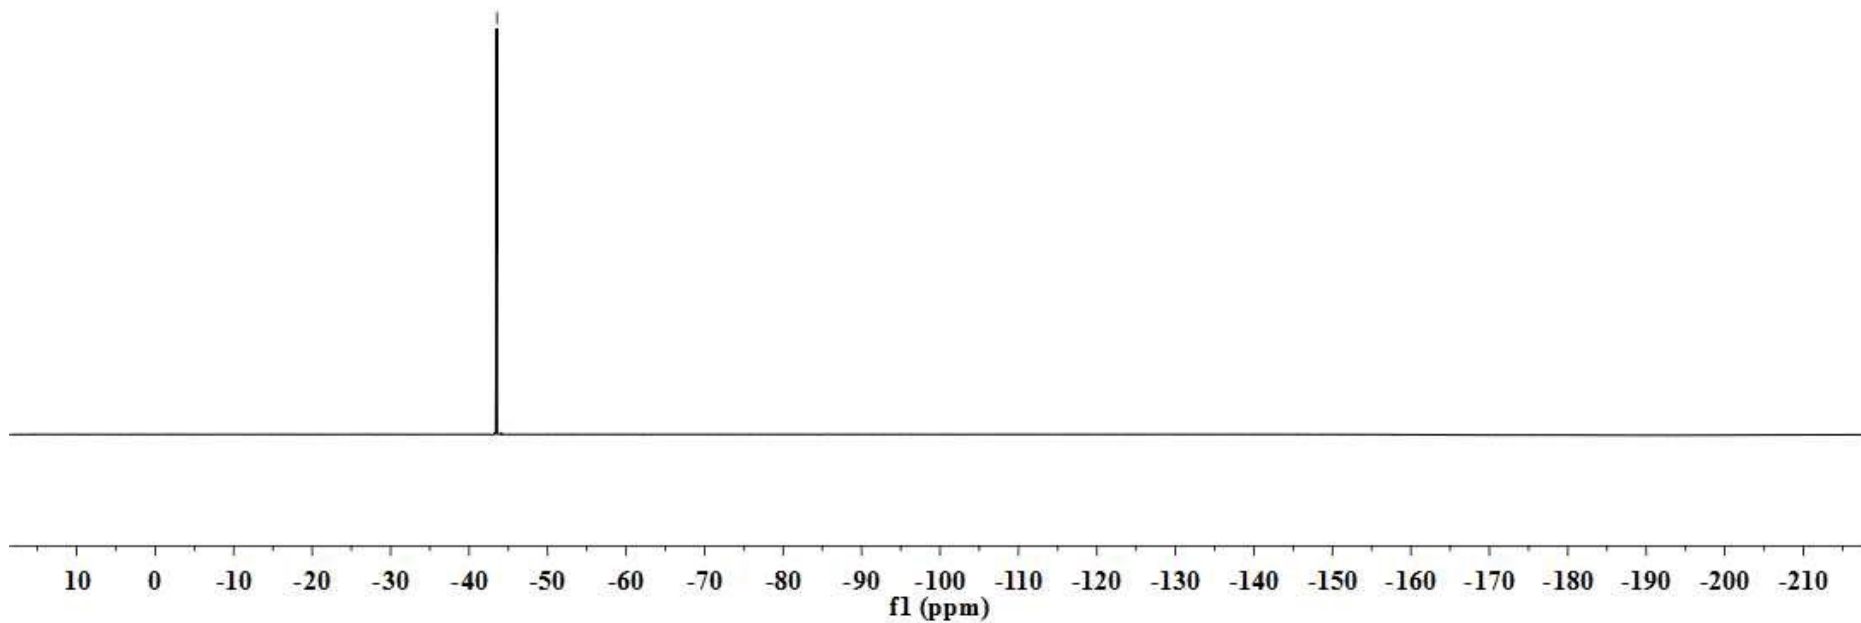



LSW-30H-SCF3

—155.45  
131.19  
129.84  
129.12  
127.05  
124.98  
124.78  
122.67  
118.66  
117.27  
—100.90  
66.85  
66.82  
66.80  
66.77

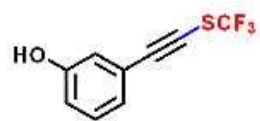

4e

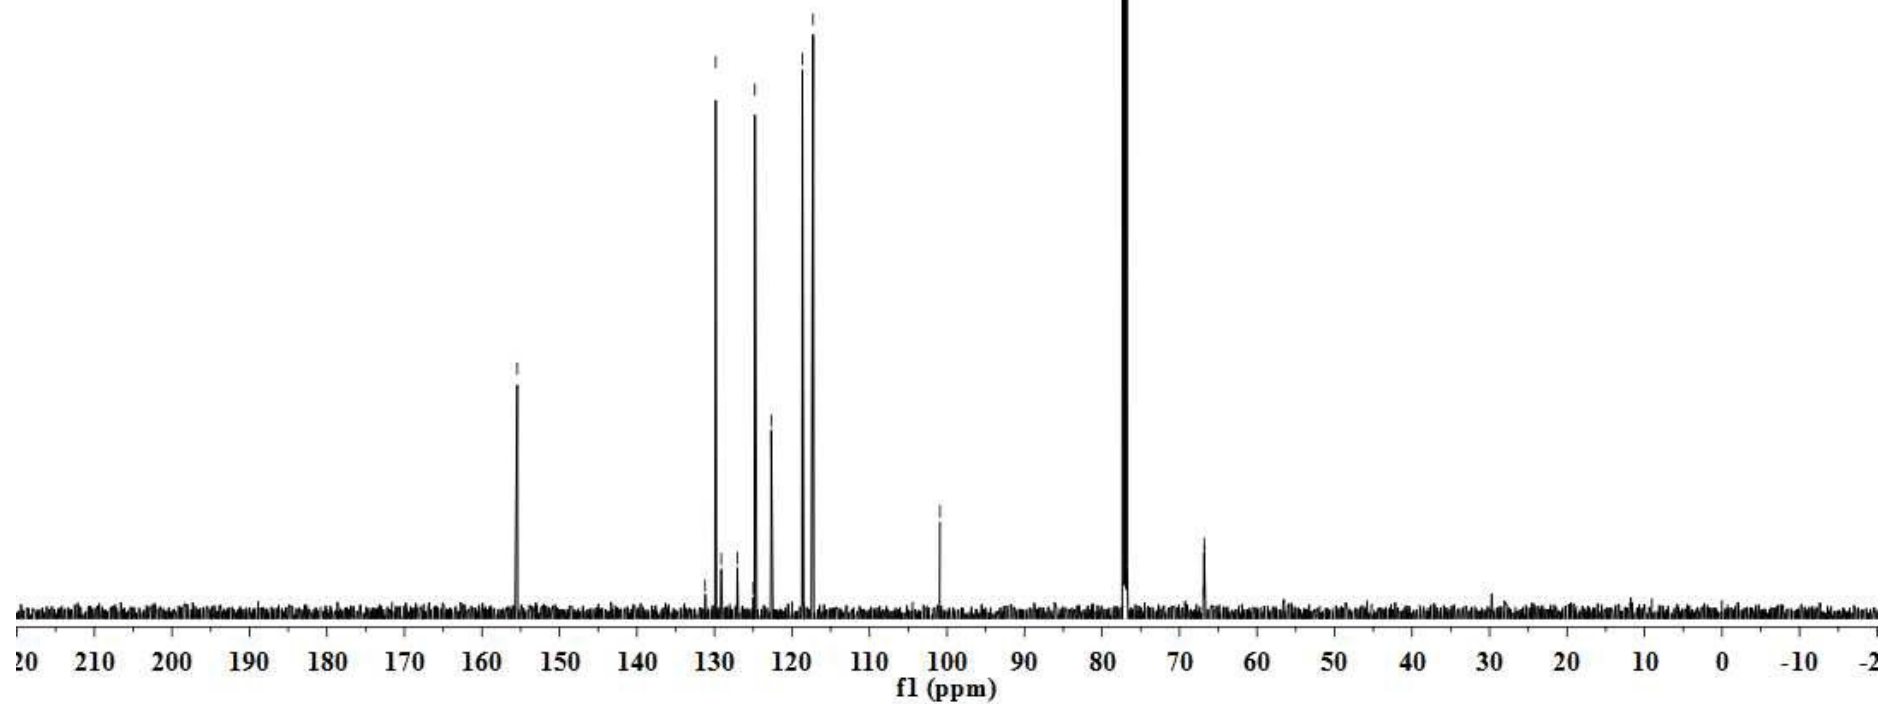

LSW-4AC-SCF3

7.95  
7.93  
7.57  
7.55

2.61

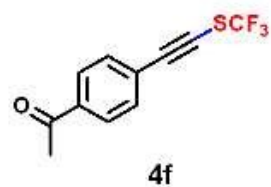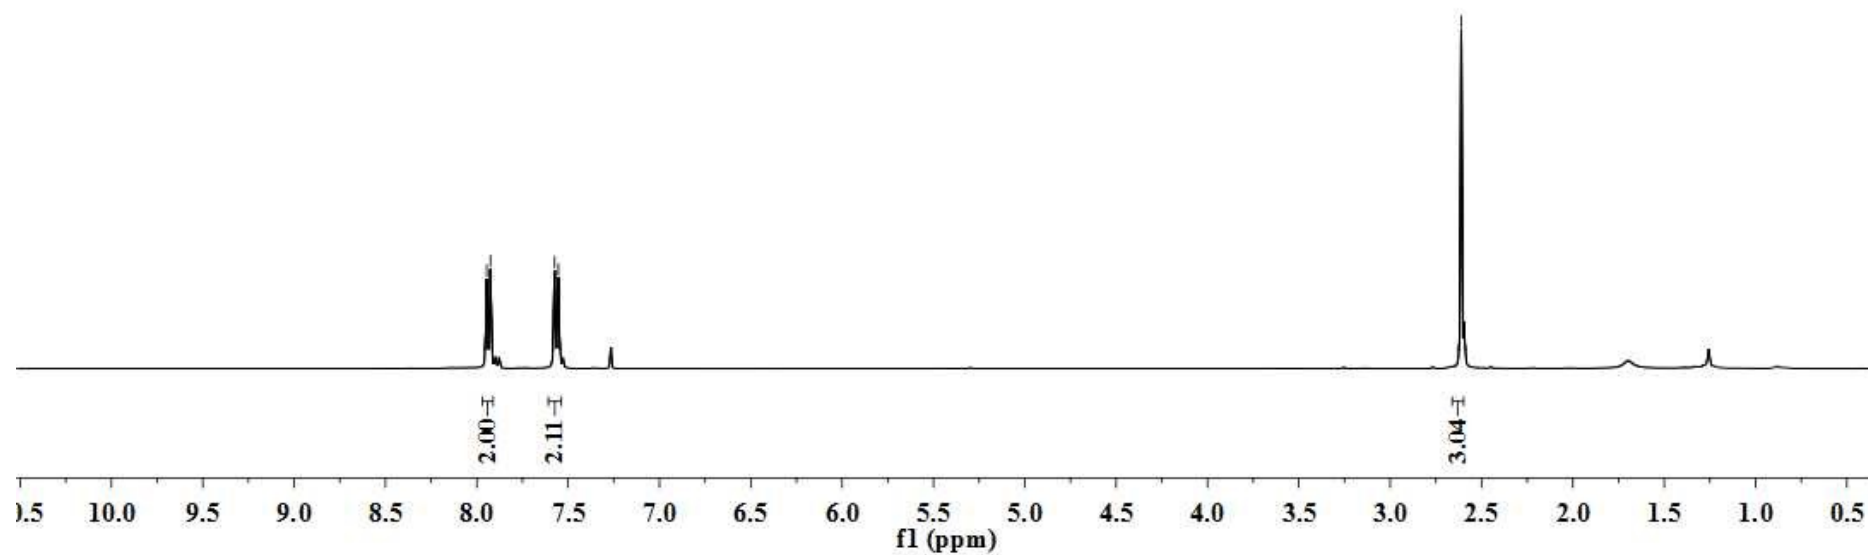

LSW-4AC-SCF3

--43.15

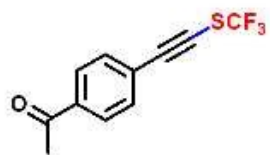

4f

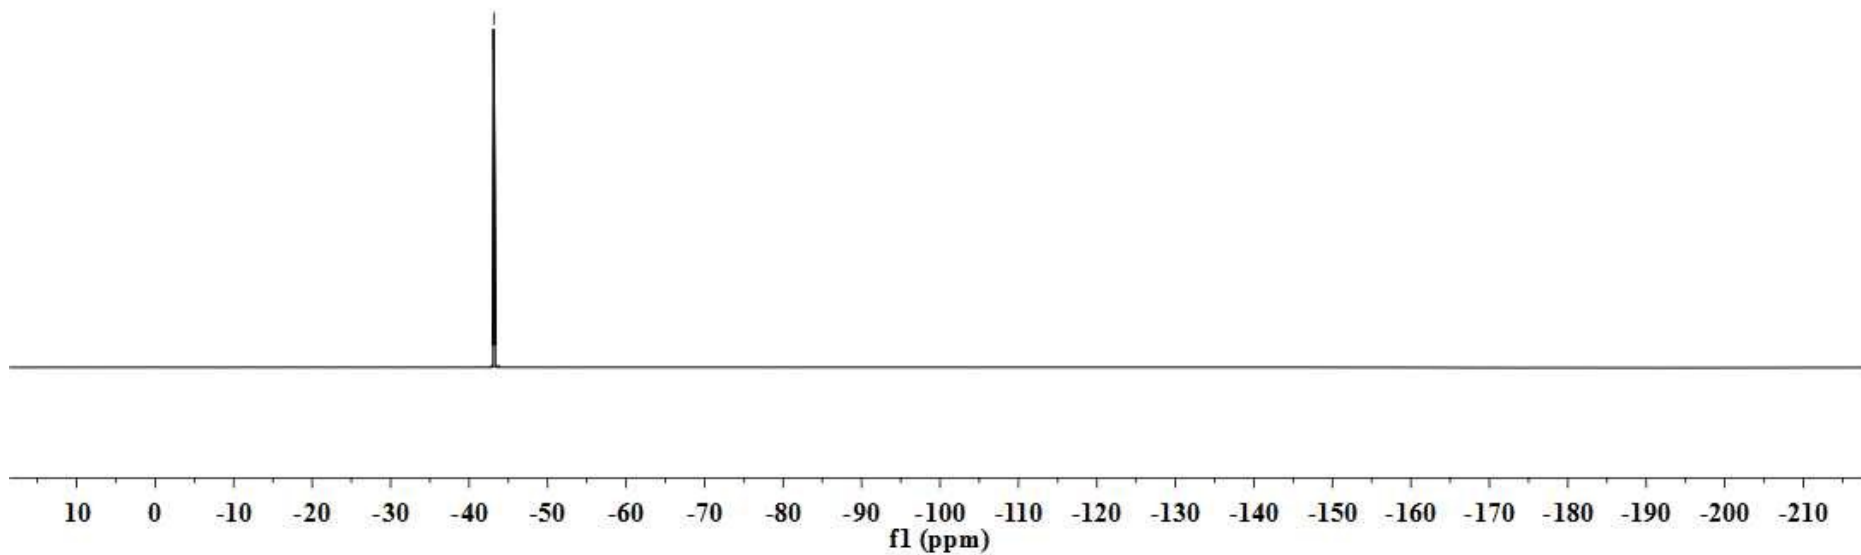

LSW-4AC-SCF3

—197.18

137.19  
131.89  
131.04  
128.97  
128.31  
126.90  
126.14  
124.83

—100.44

70.46  
70.44  
70.41  
70.38

—26.66

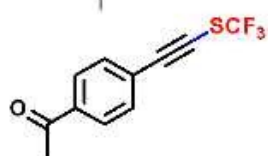

4f

LSW-4AC-SCF3

70.46  
70.44  
70.41  
70.38

70.55 70.50 70.45 70.40 70.35 70.30  
fl (ppm)

200 190 180 170 160 150 140 130 120 110 100 90 80 70 60 50 40 30 20 10  
fl (ppm)

## 7. References

1. Shimada, H.; Kikuchi, S.; Okuda, S.; Haraguchi, K.; Tanaka, H. *Tetrahedron* **2009**, *65*, 6008-6016.
2. Hu, X.; Li, Z.; Ge, Y.; Liu, S.; Shi, C. *Colloids Surf. A Physicochem. Eng. Aspects* **2022**, *643*, 128782.
